# Supplementary material
Source: PubMed Central journal article supplement (PMC5799868)
Supplement: jo7b02984_si_001.pdf [file jo7b02984_si_001.pdf]

**Supporting Information**  
**Two Step Macrocycle Synthesis by Classical Ugi Reaction**

Eman M. M. Abdelraheem<sup>†‡</sup>, Samad Khaksar<sup>†</sup>, Katarzyna Kurpiewska<sup>§</sup>, Justyna Kalinowska-Thućik<sup>§</sup>,  
Shabnam Shaabani<sup>†</sup> and Alexander Dömling<sup>†\*</sup>

<sup>†</sup> University of Groningen, Department of Drug Design, A. Deusinglaan 1, 9713 AV Groningen, The  
Netherlands

<sup>‡</sup> Chemistry Department, Faculty of Science, Sohag University, Sohag, 82524, Egypt

<sup>§</sup> Faculty of Chemistry, Jagiellonian University, Gronostajowa 2, 30-387 Krakow, Poland

**Table of Contents**

|                                                                                                             |      |
|-------------------------------------------------------------------------------------------------------------|------|
| <sup>1</sup> H, <sup>13</sup> C NMR chromatograms and mass spectra of the novel synthesized compounds ..... | S2   |
| Crystal structure determination .....                                                                       | S47  |
| References .....                                                                                            | S50  |
| Virtual library synthesis .....                                                                             | S50  |
| List of random 1000 product smiles .....                                                                    | S43  |
| List of 221 amino isocyanides smiles .....                                                                  | S84  |
| List of 272 oxo compounds smiles .....                                                                      | S91  |
| List of 205 carboxylic acids smiles .....                                                                   | S100 |

**$^1\text{H}$ ,  $^{13}\text{C}$  NMR chromatograms and mass spectra of the novel synthesized compounds:**

Compound 3a:

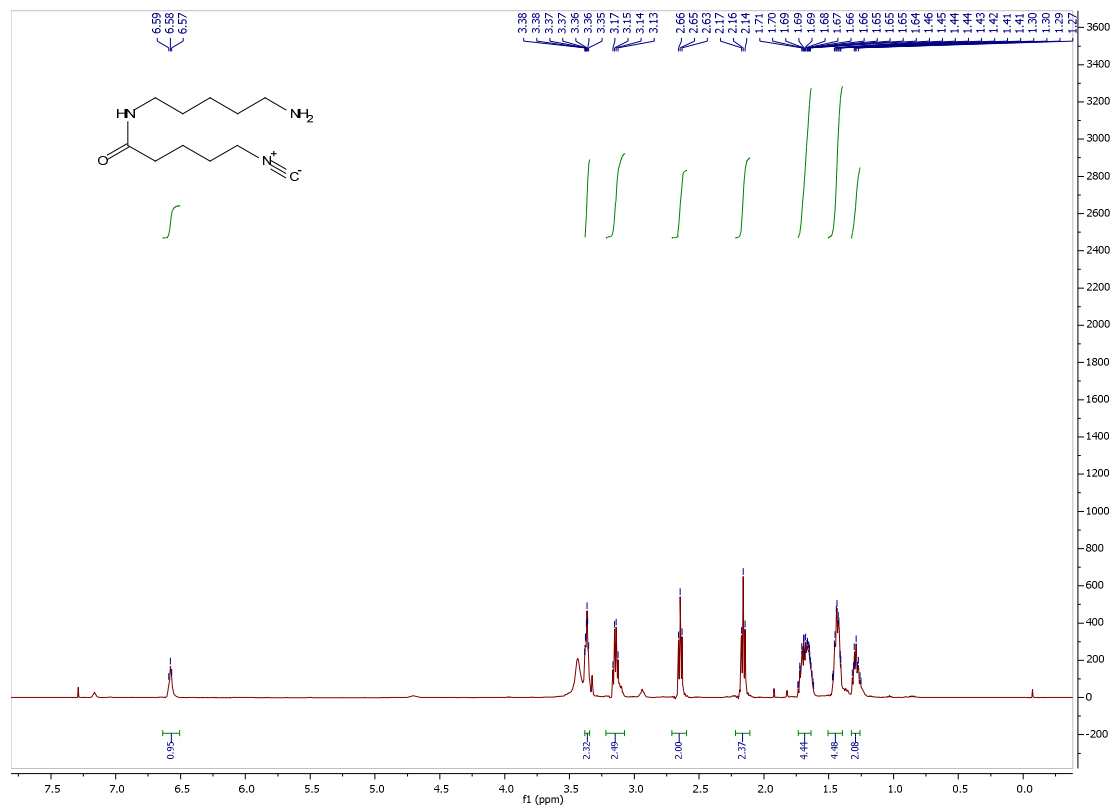

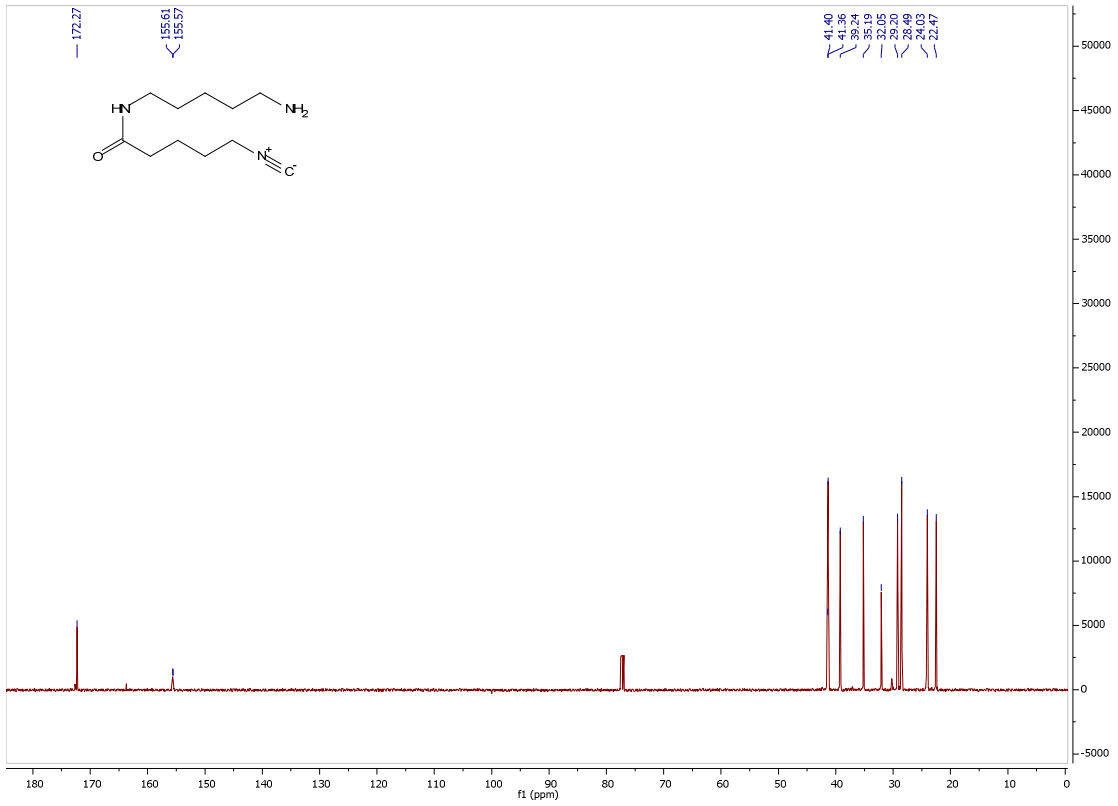

Compound

3b:

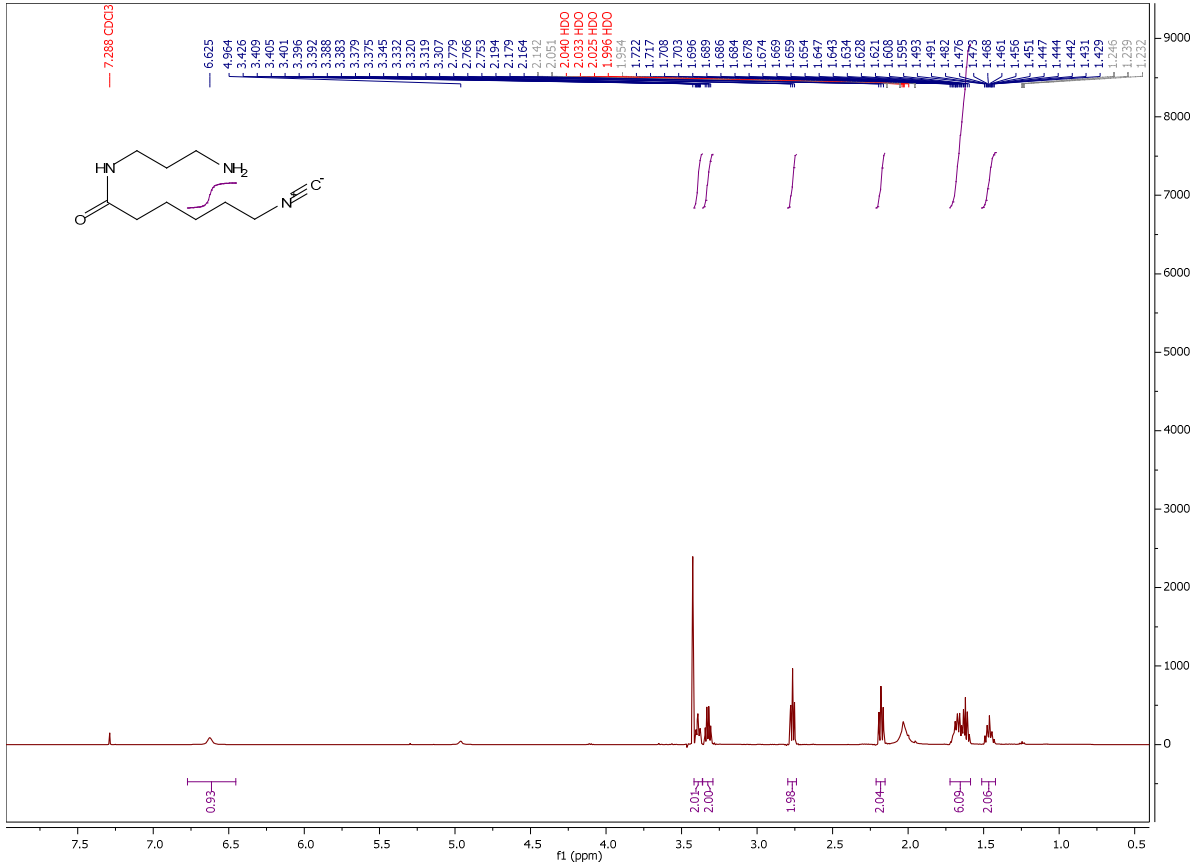

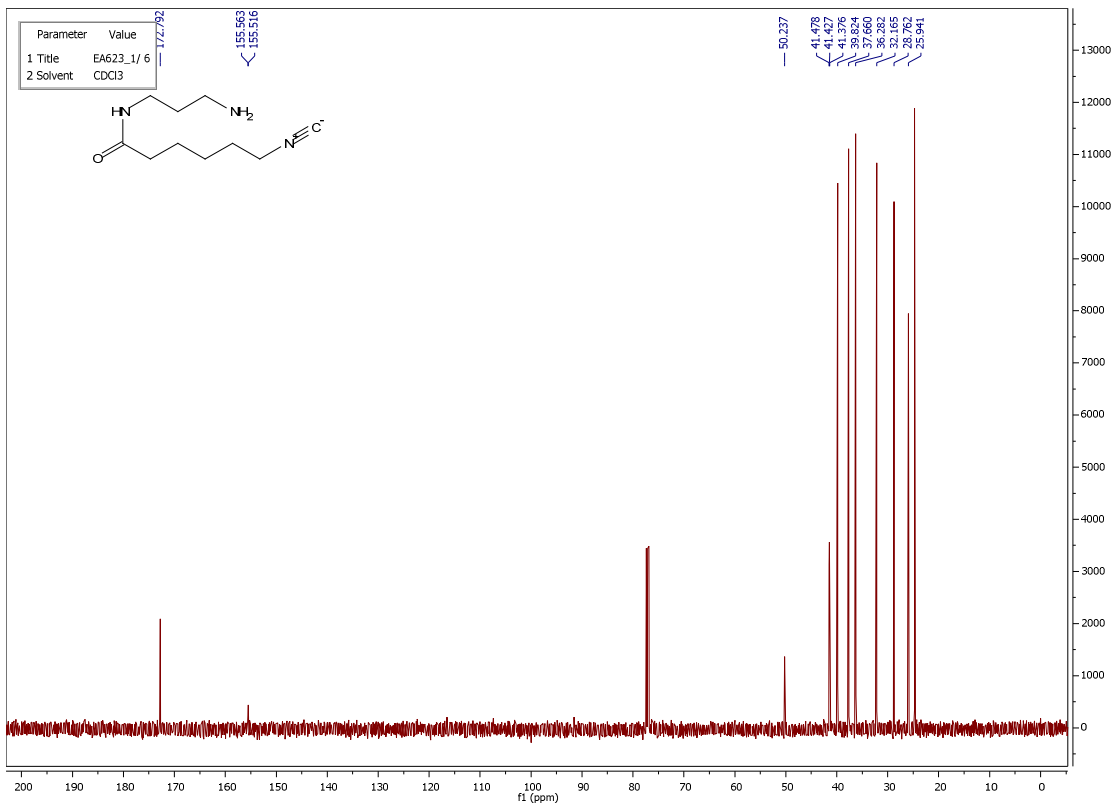

Compound 3c:

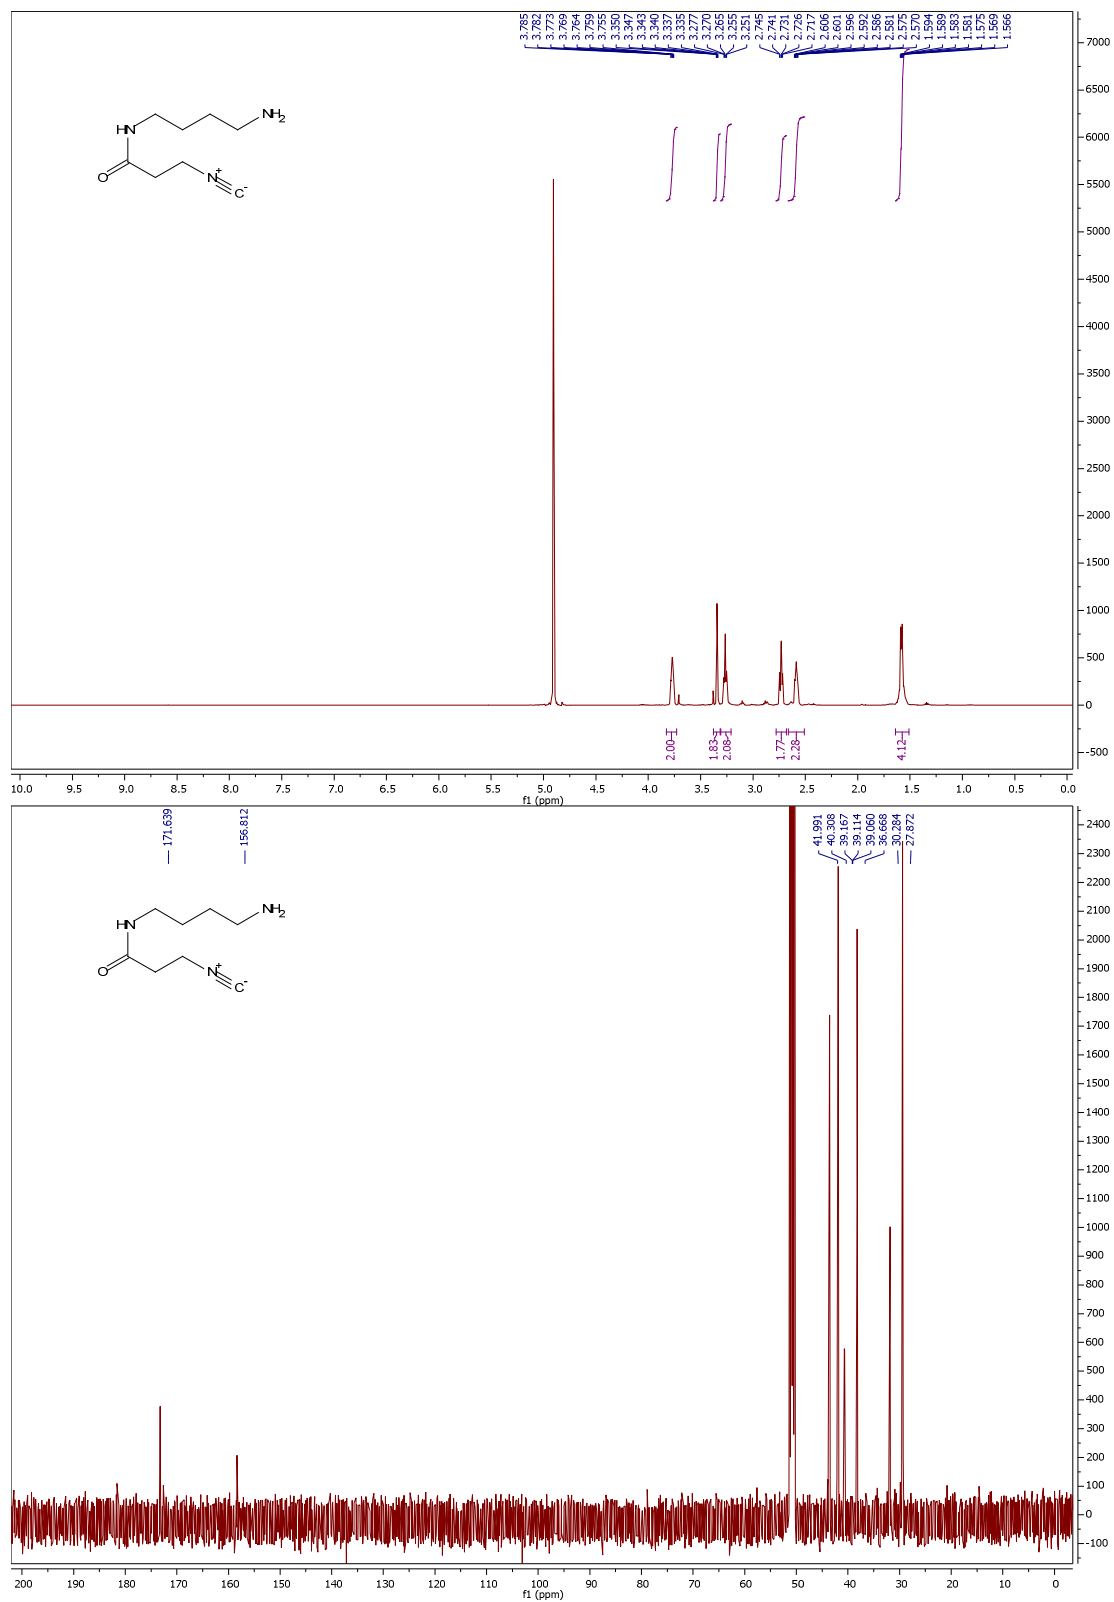

Compound 3d:

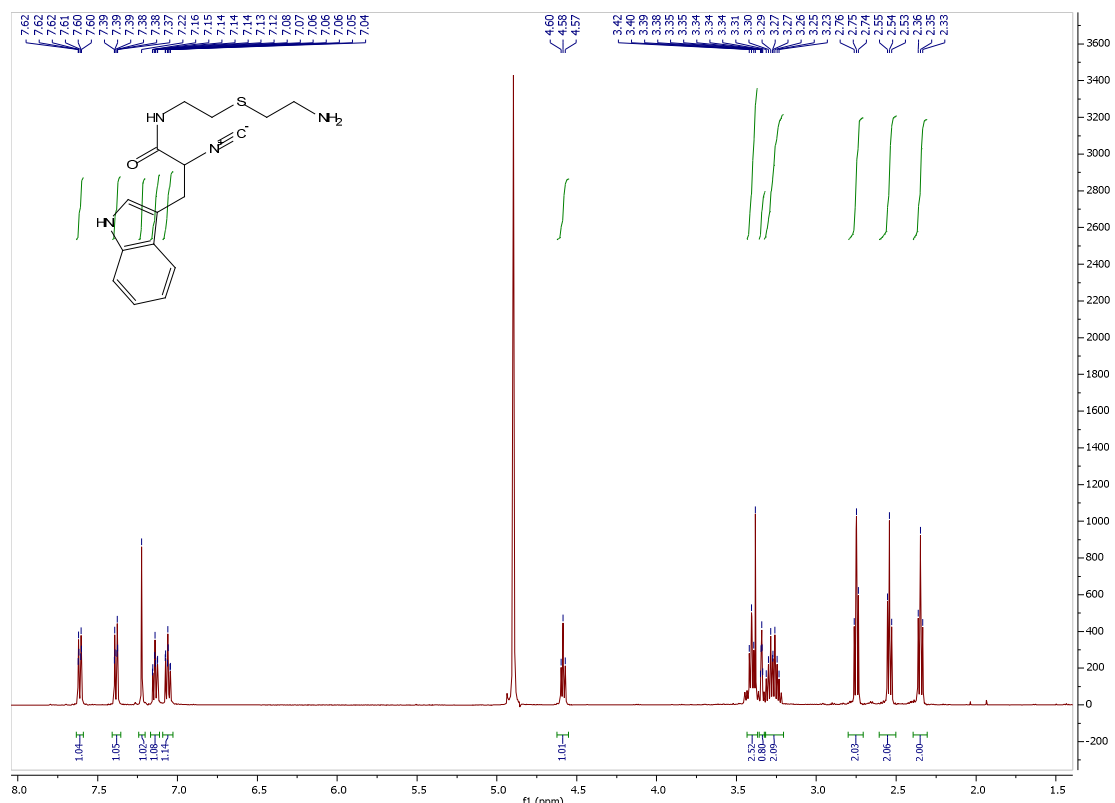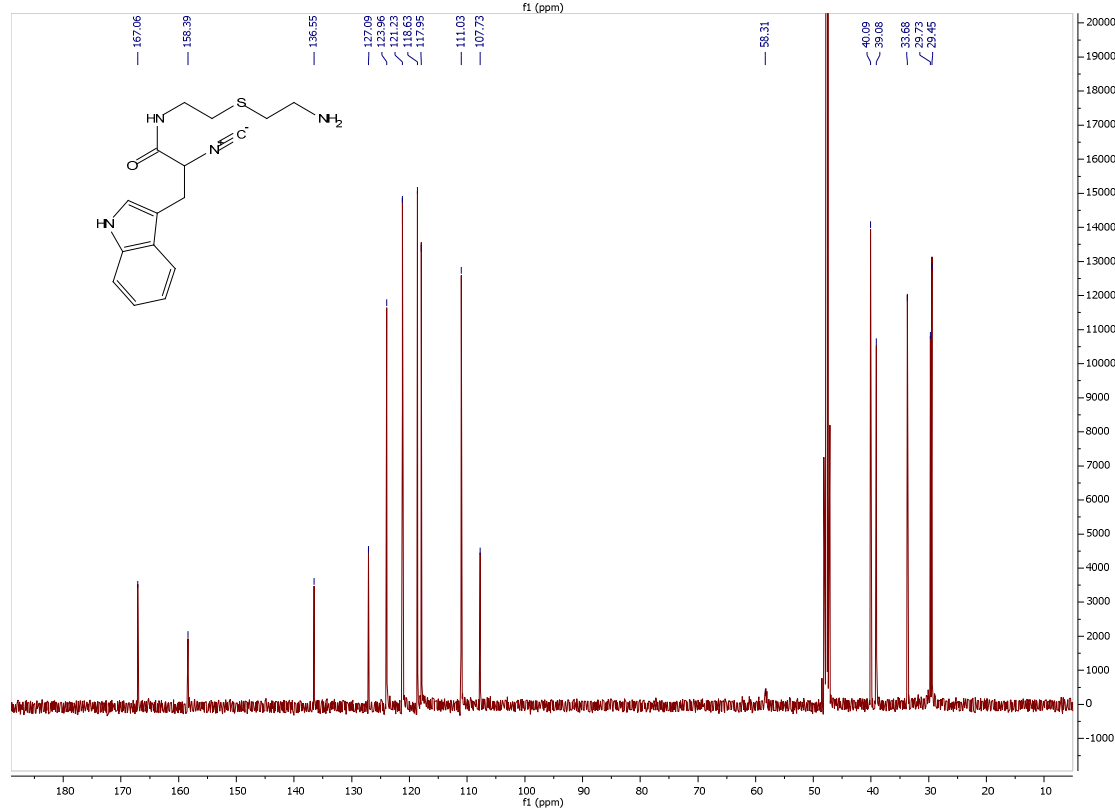

Compound 3e:

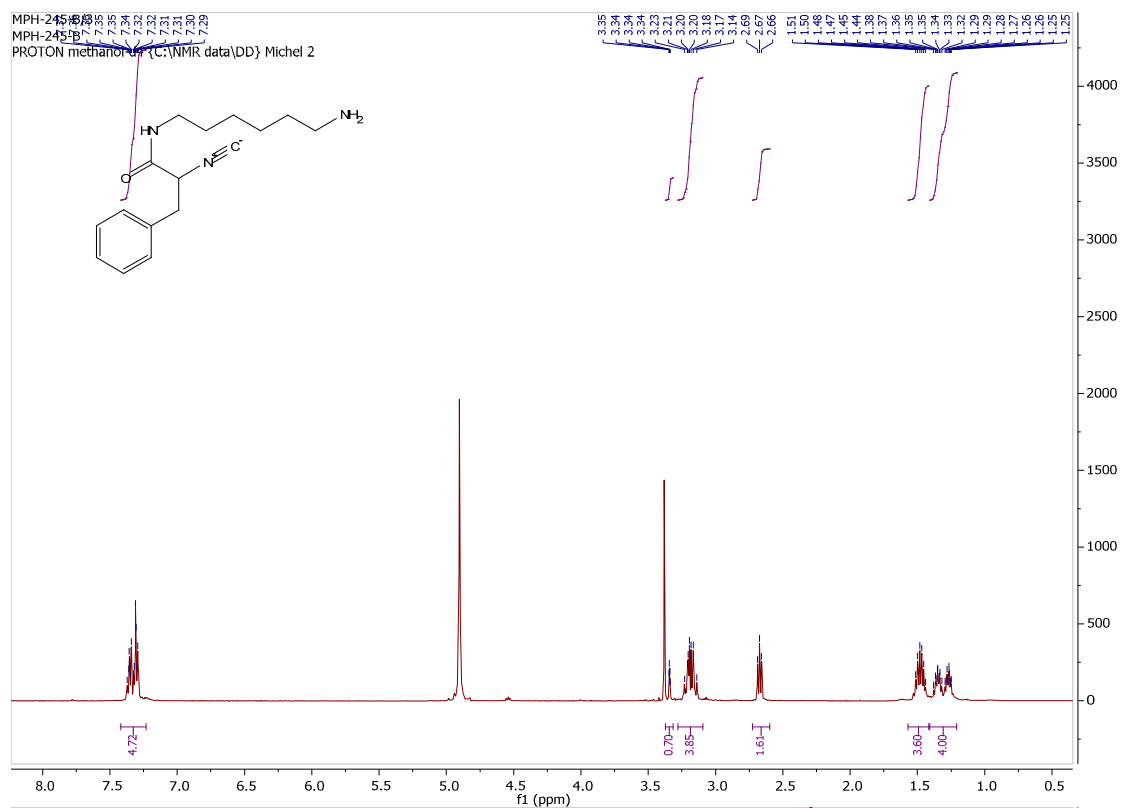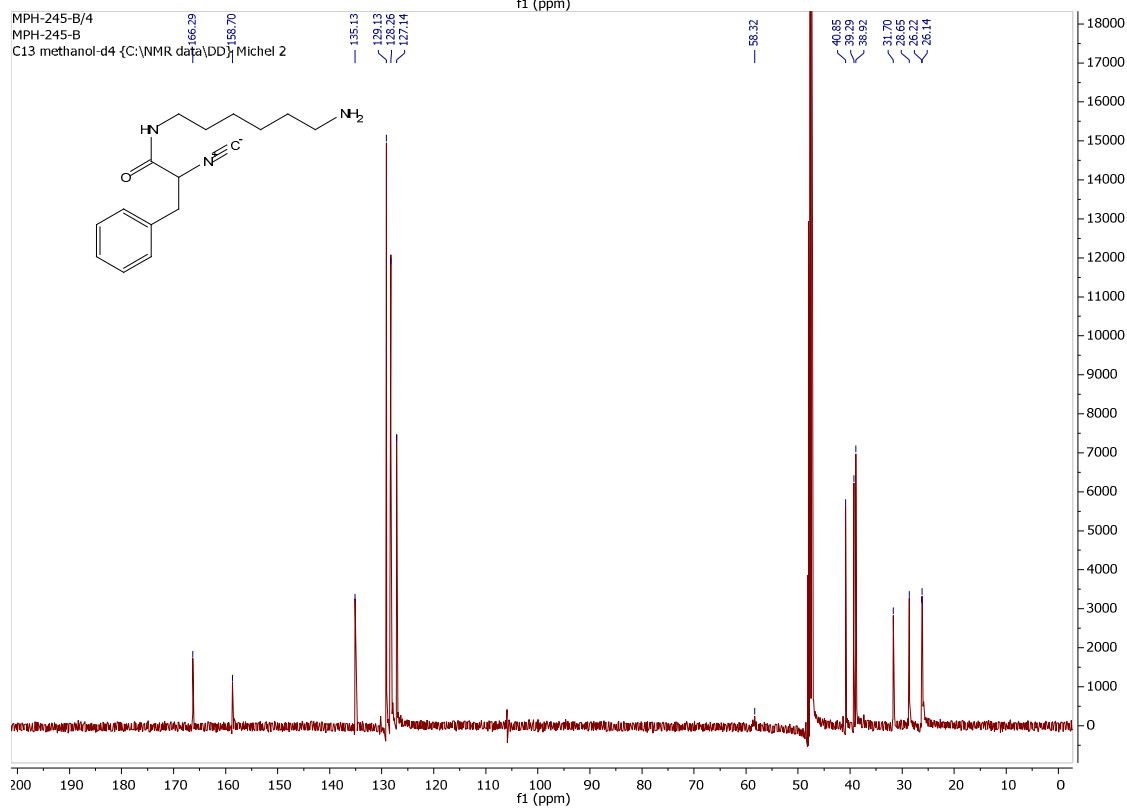

Compound 3f:

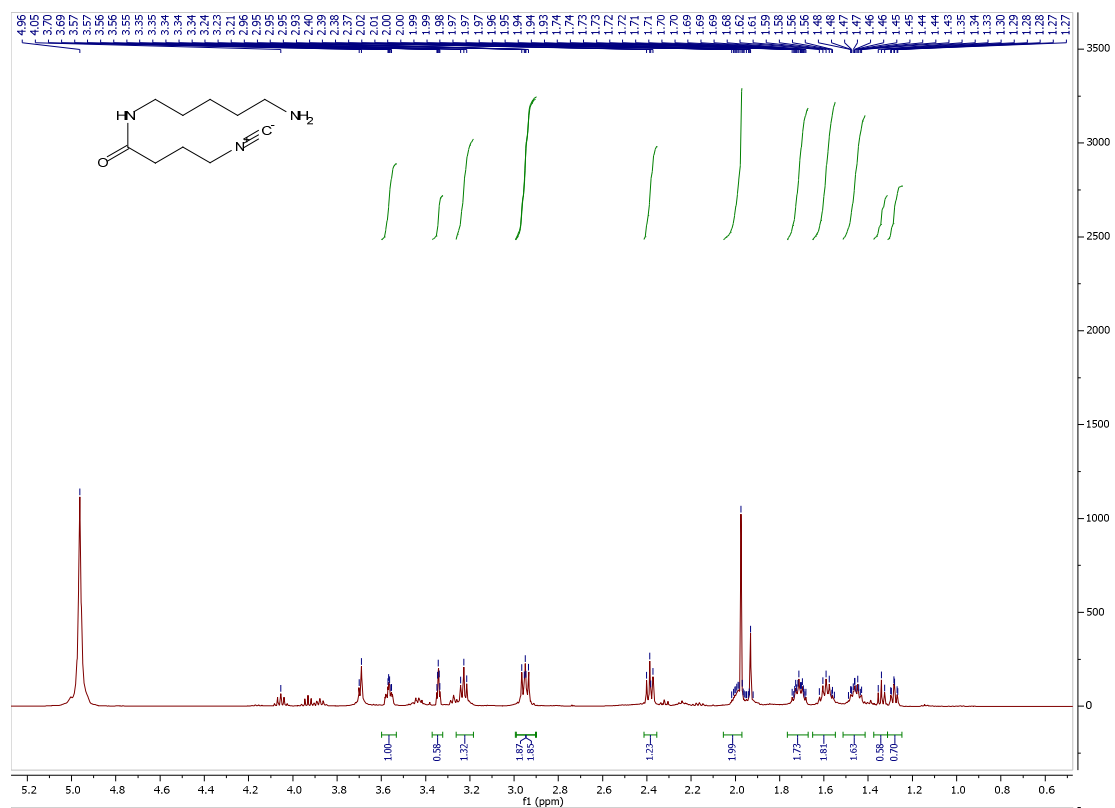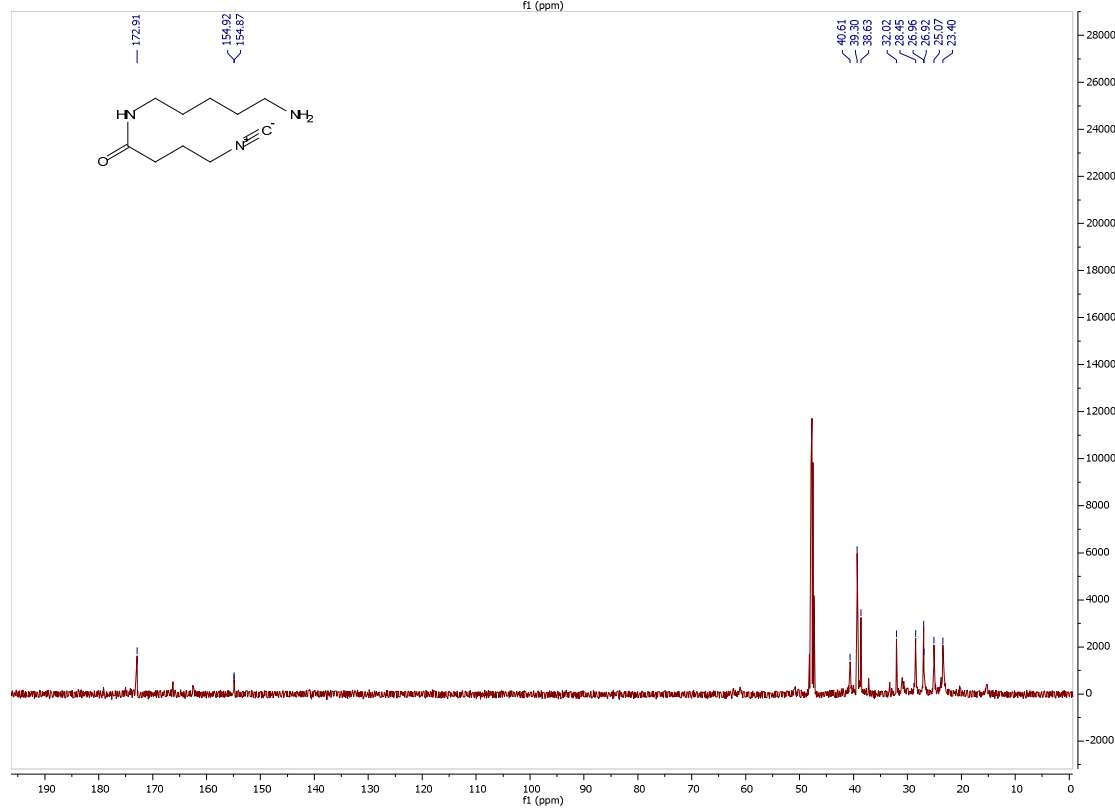



17mdv246-DP17 #28 RT: 0.12 AV: 1 NL: 1.09E8  
T: FTMS + p ESI Full ms [150.0000-1250.0000]

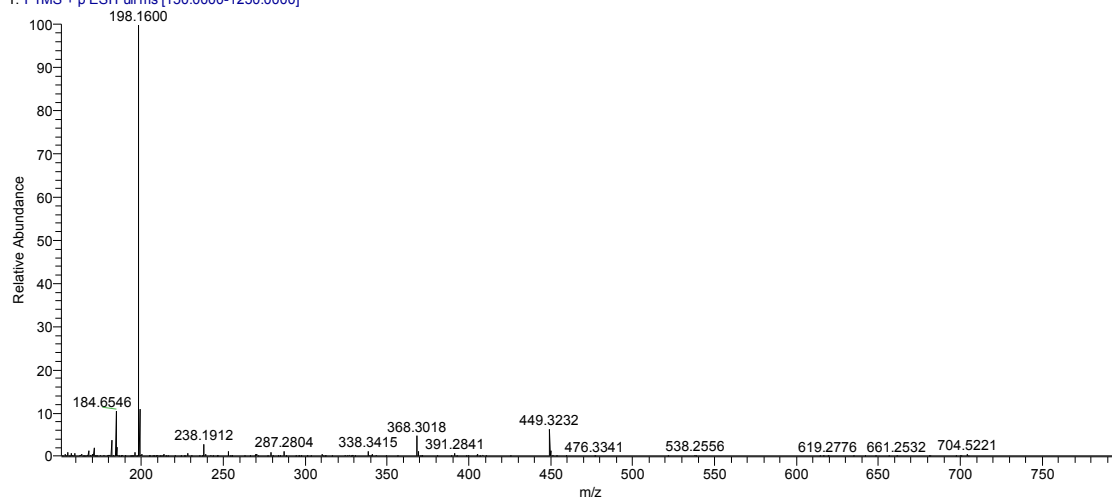

Compound 3g:

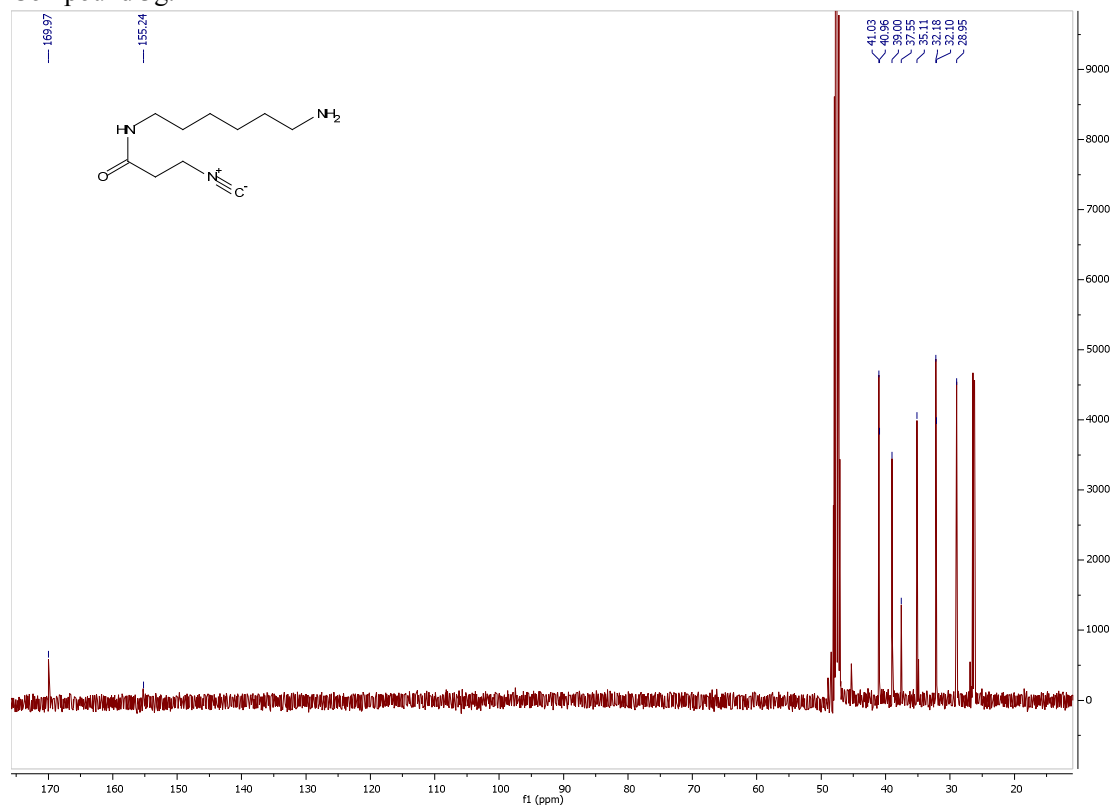

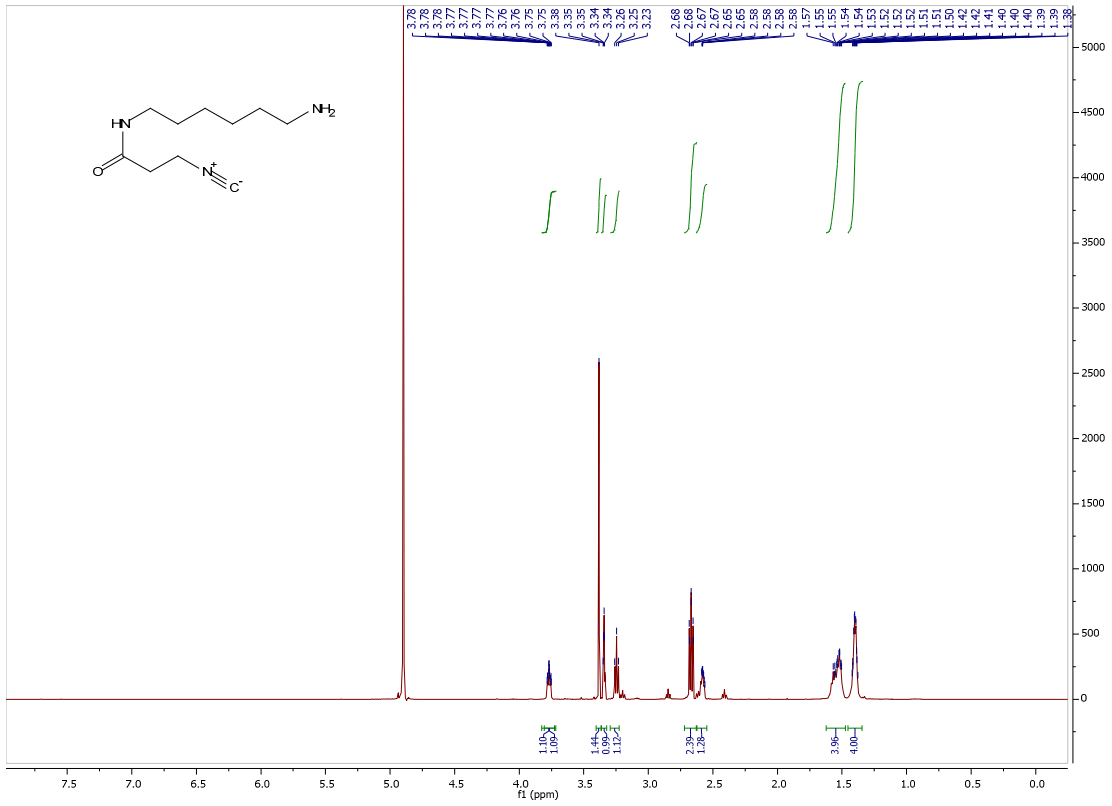

D:\XCALIBUR...17mdv246-165

11/29/17 17:37:53

17mdv246-165 #28 RT: 0.12 AV: 1 NL: 1.30E8  
T: FTMS + p ESI Full ms [150.0000-1250.0000]

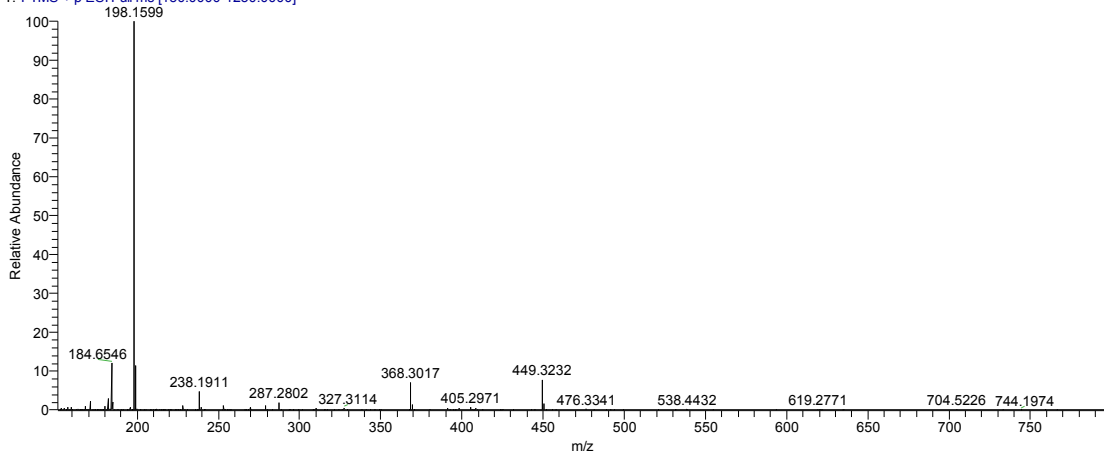

Compound 3h:

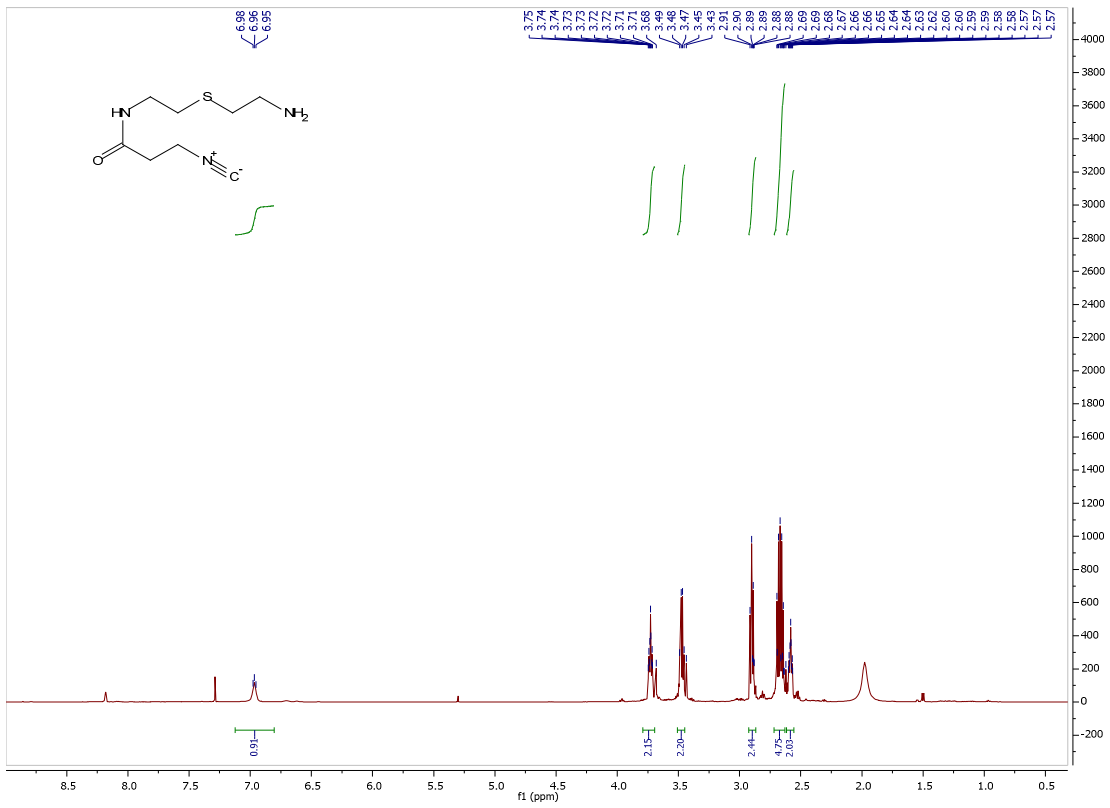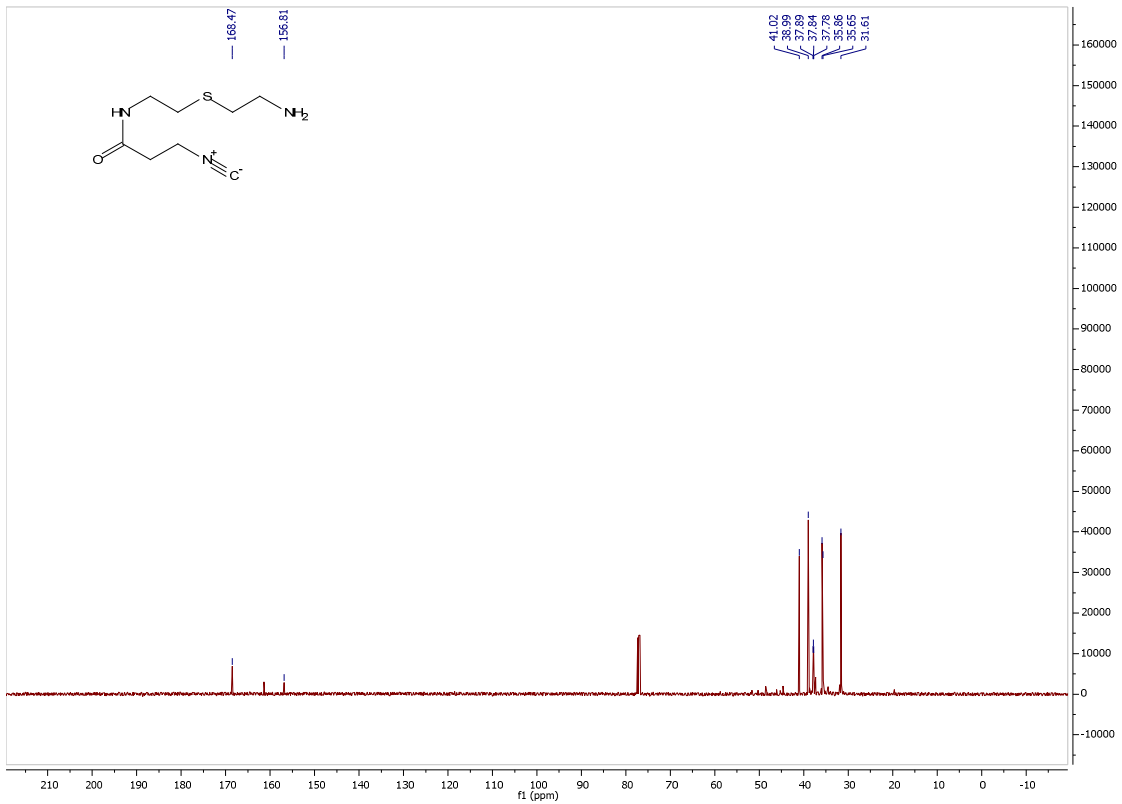

Compound 3i:

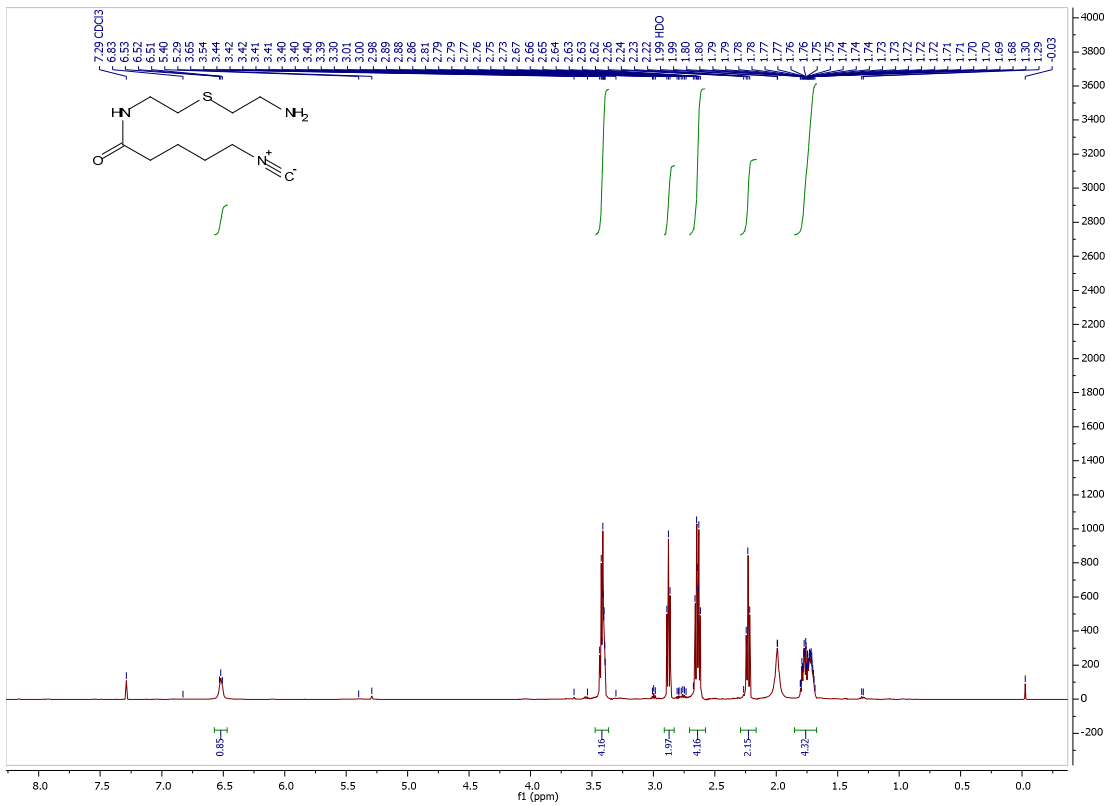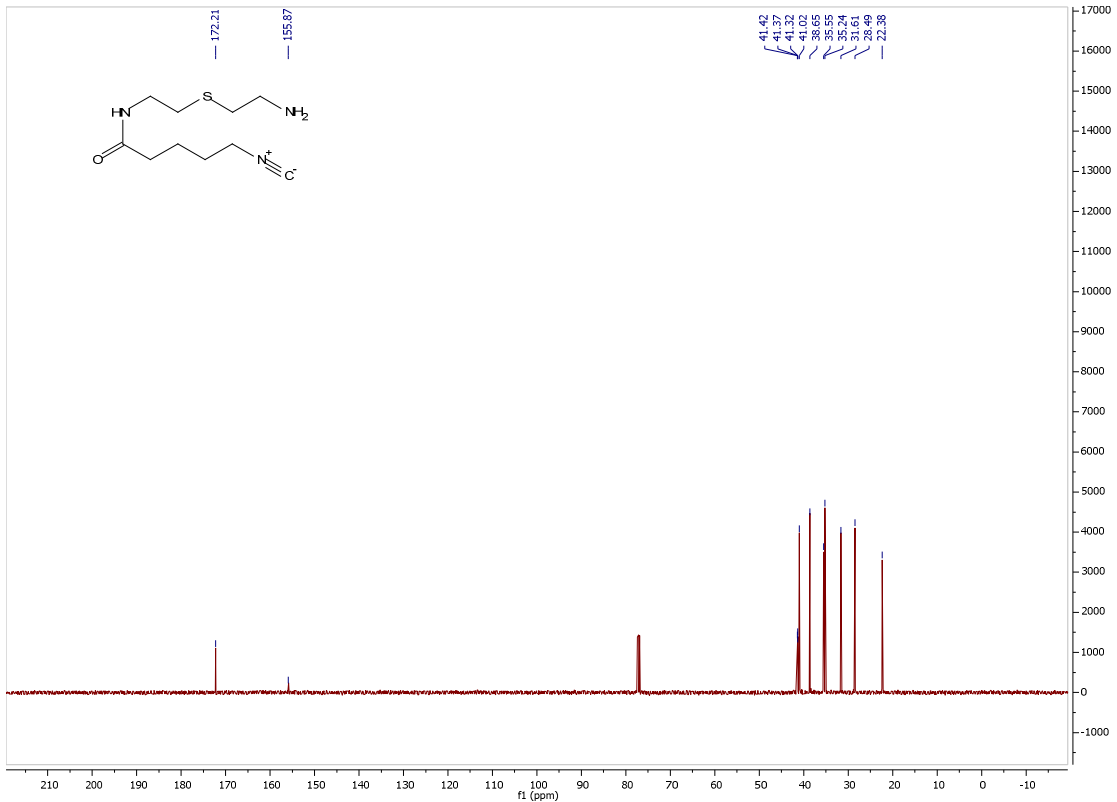

17mdv246-676 #28 RT: 0.12 AV: 1 NL: 4.25E8  
T: FTMS + p ESI Full ms [150.0000-1250.0000]

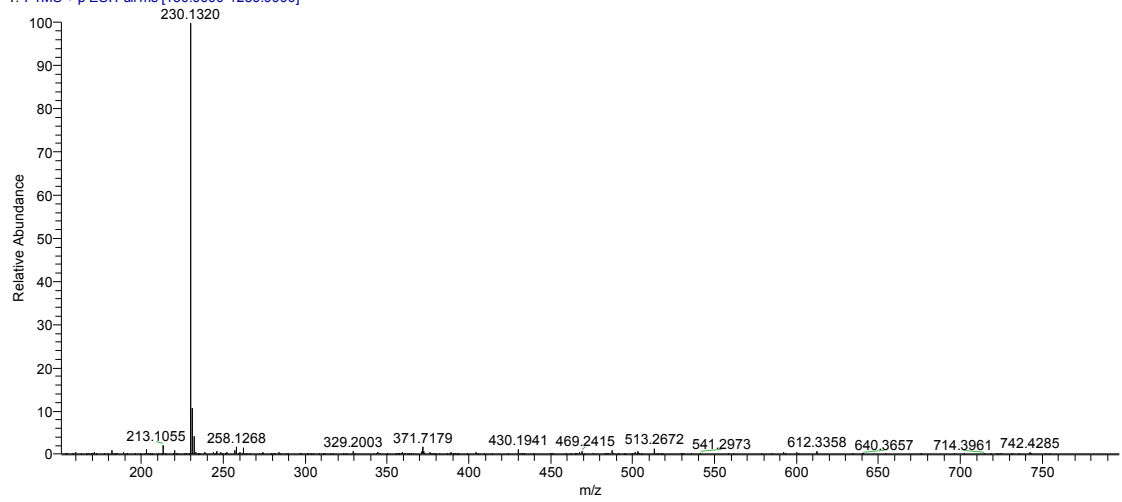

Compound 3j:

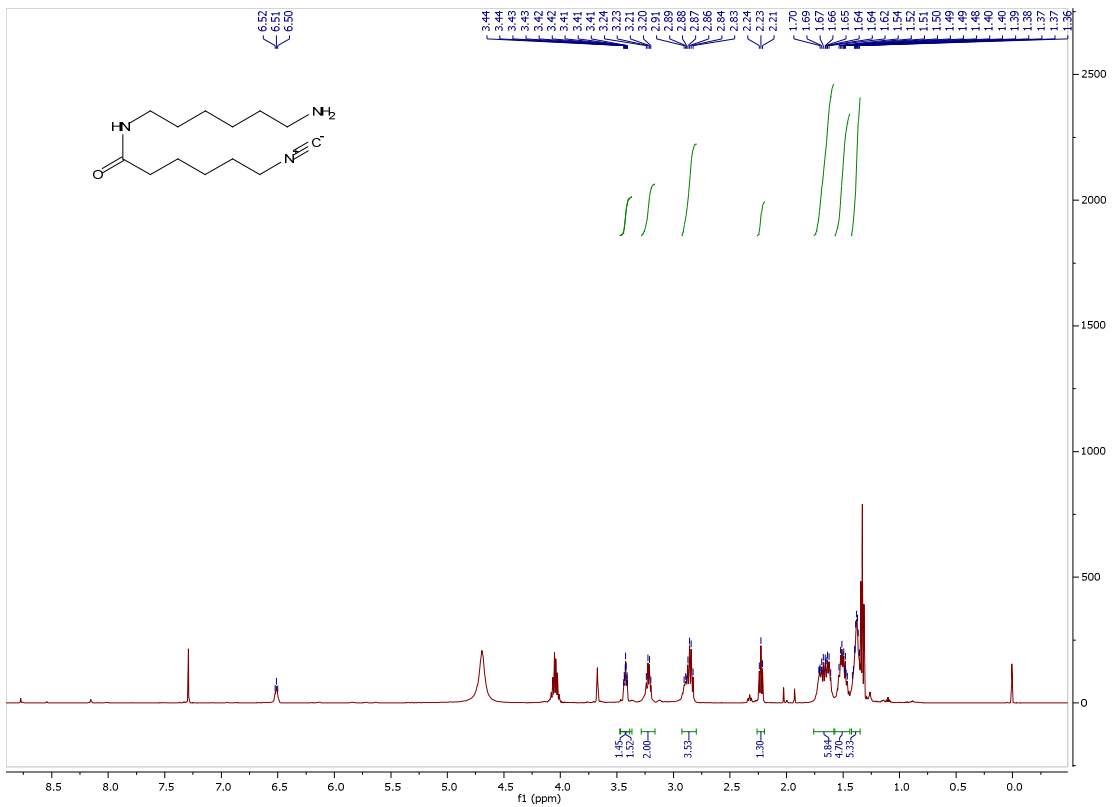

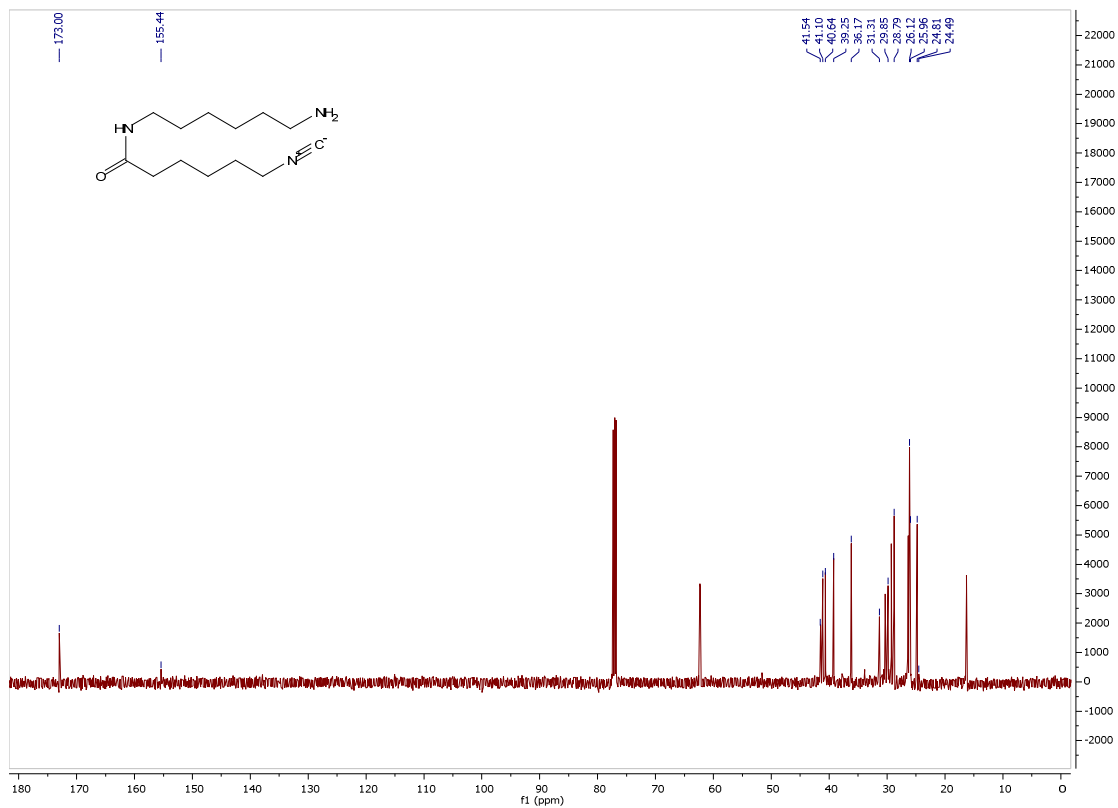

D:\XCALIBUR...17mdv246-706-1

11/29/17 17:51:16

17mdv246-706-1 #28 RT: 0.12 AV: 1 NL: 1.76E8  
T: FTMS + p ESI Full ms [150.0000-1250.0000]

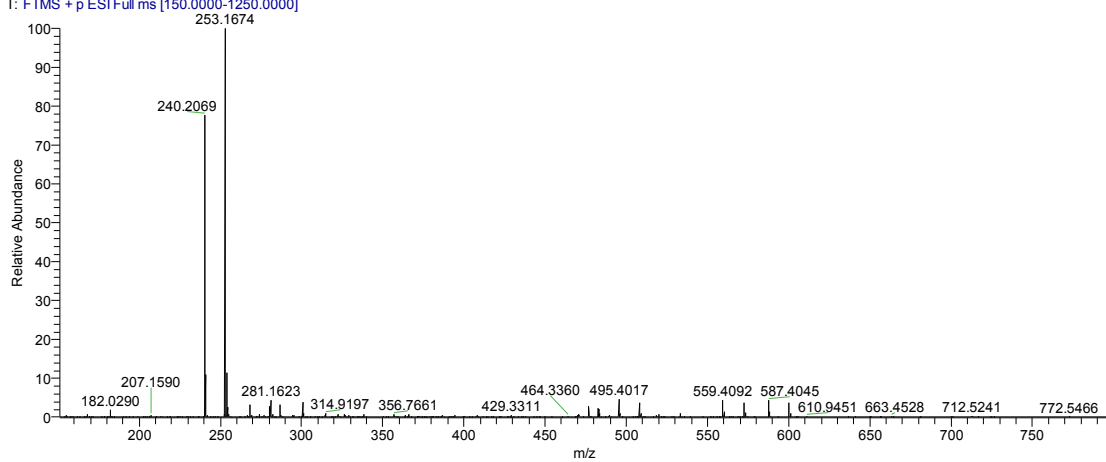

Compound 6a:

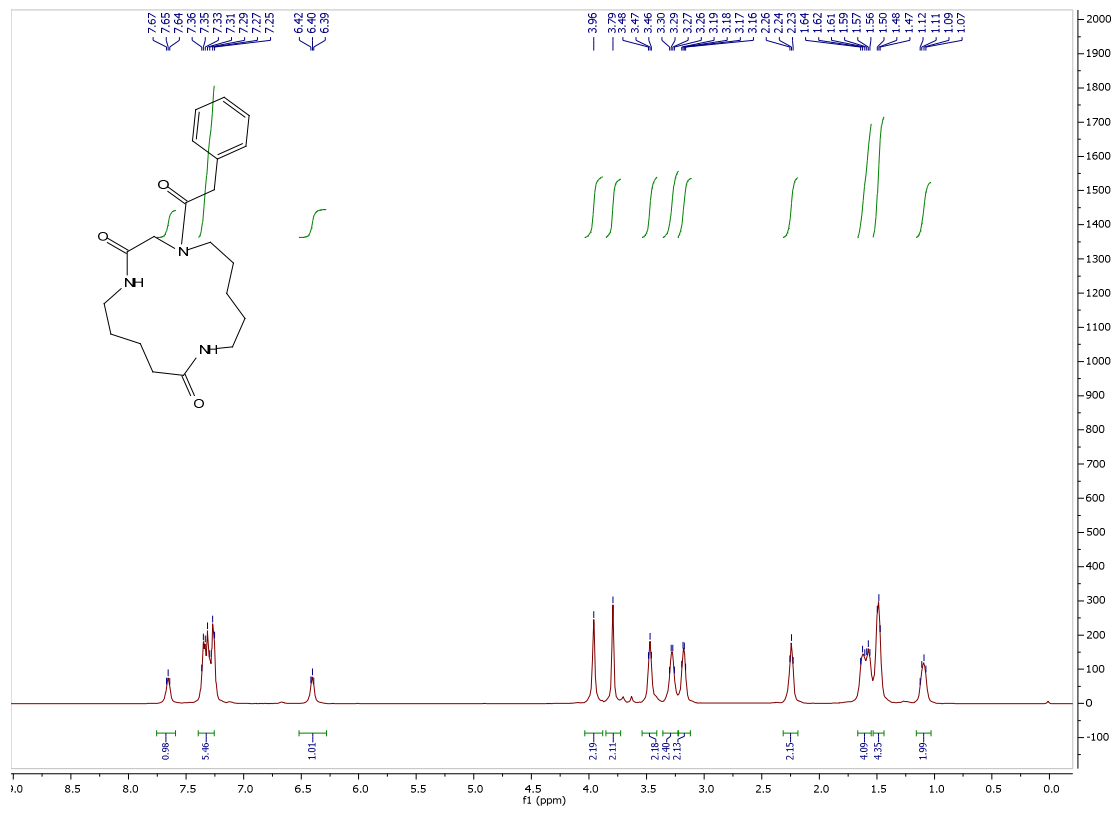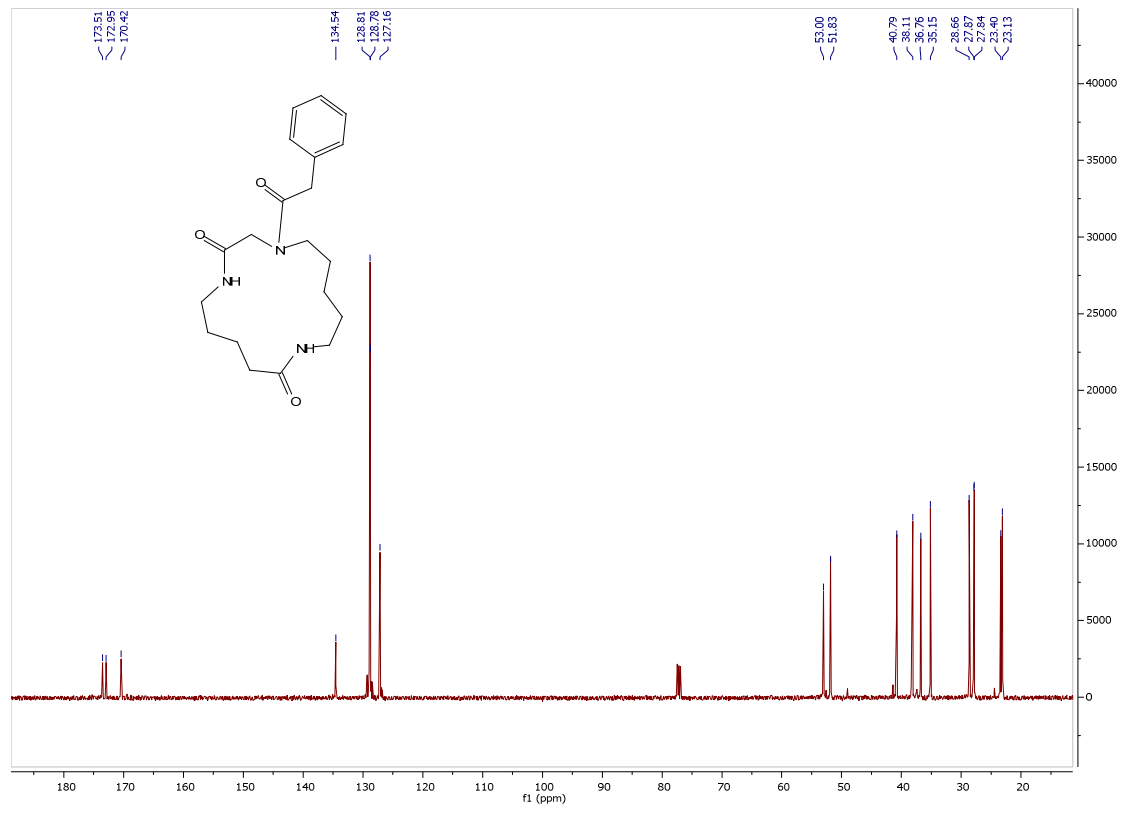

17mdv246-701a #28 RT: 0.12 AV: 1 NL: 2.14E8  
T: FTMS + p ESI Full ms [150.0000-1250.0000]

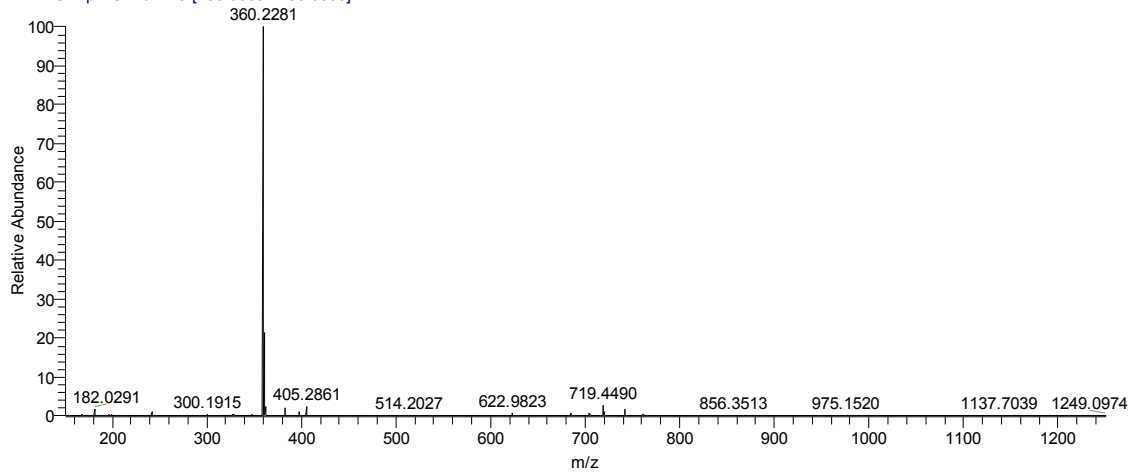

Compound 6b:

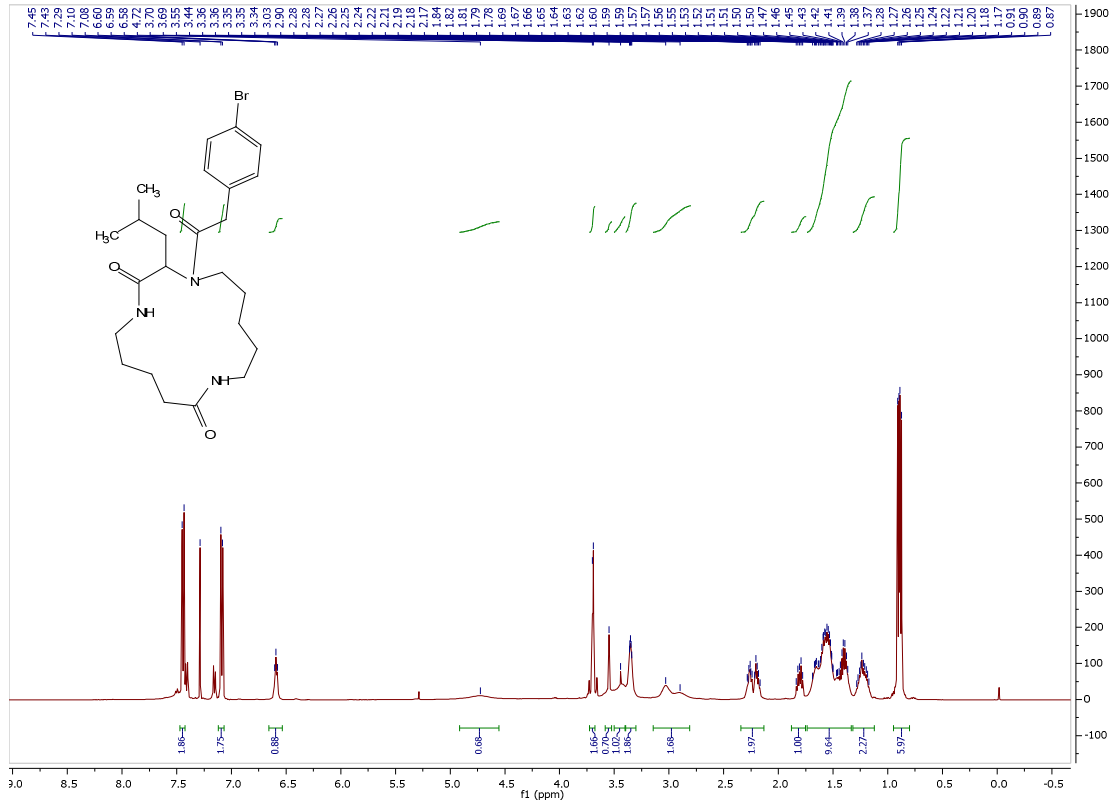



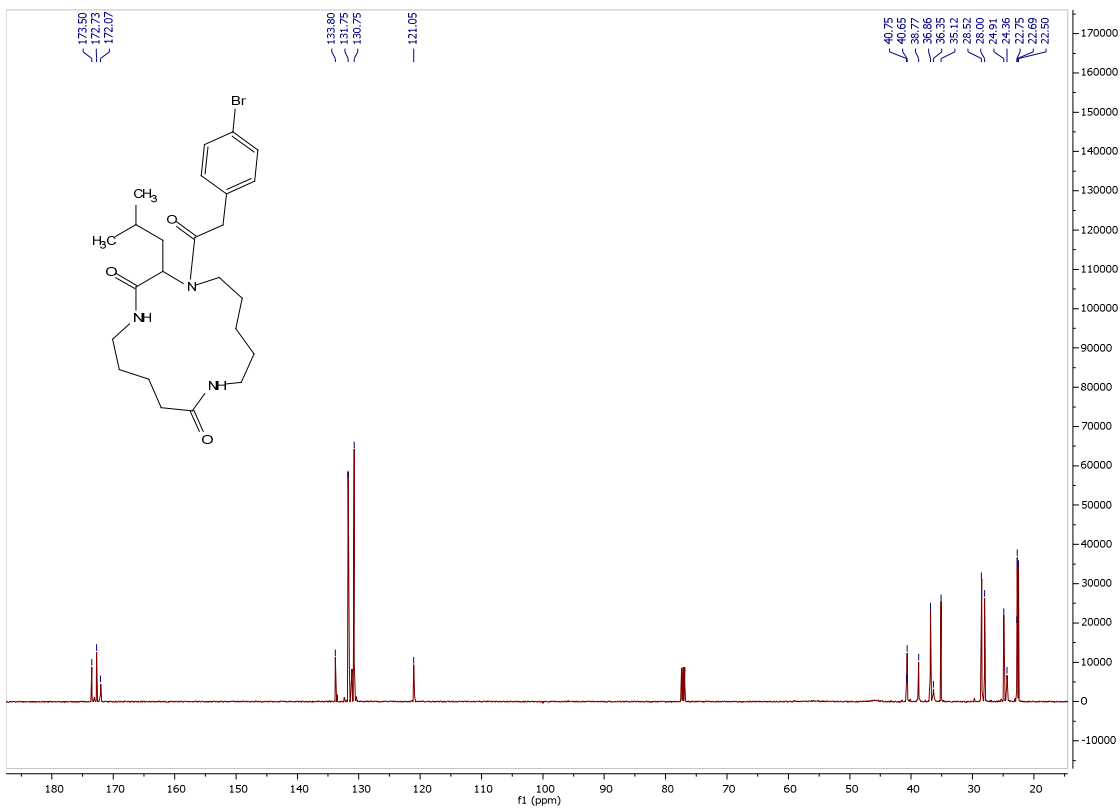

D:\XCALIBUR\...17mdv246-701b

11/29/17 15:43:59

17mdv246-701b #28 RT: 0.12 AV: 1 NL: 1.66E8  
T: FTMS + p ESI Full ms [150.0000-1250.0000]

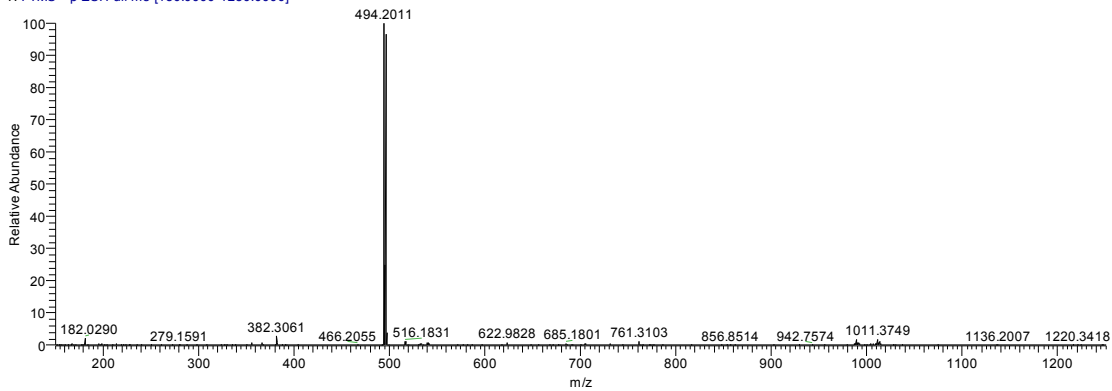

Compound 6c:

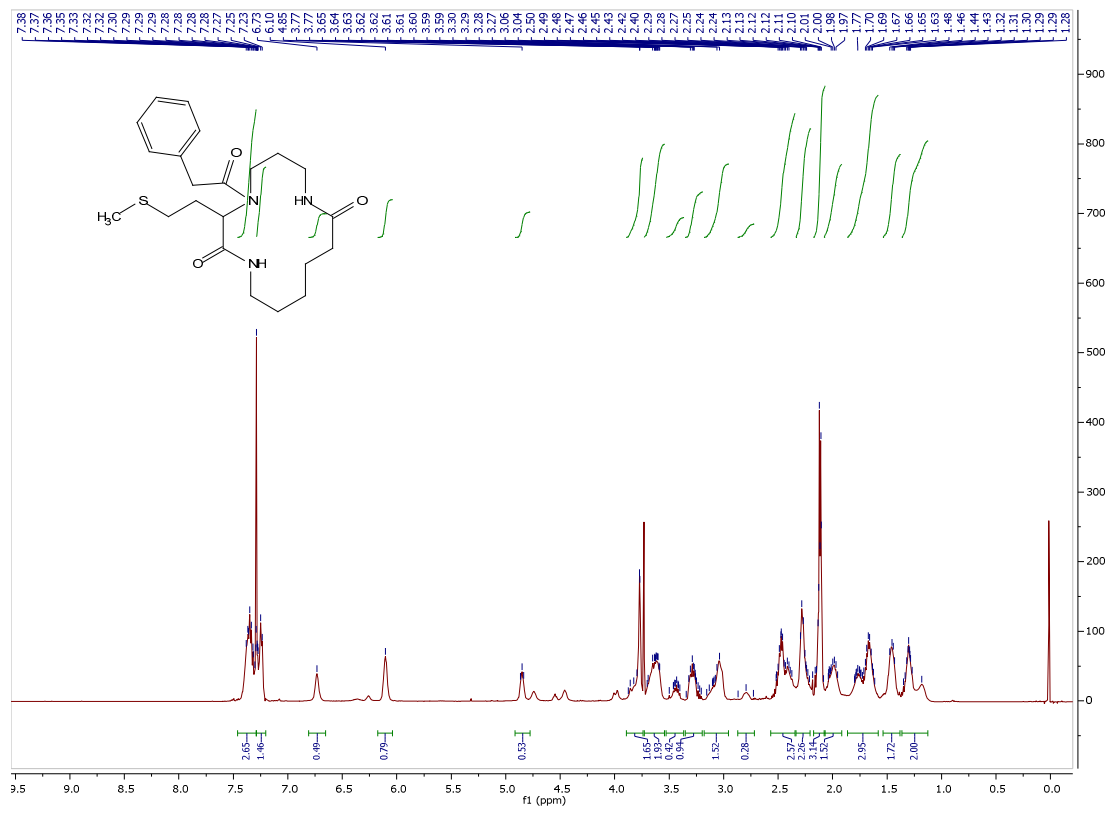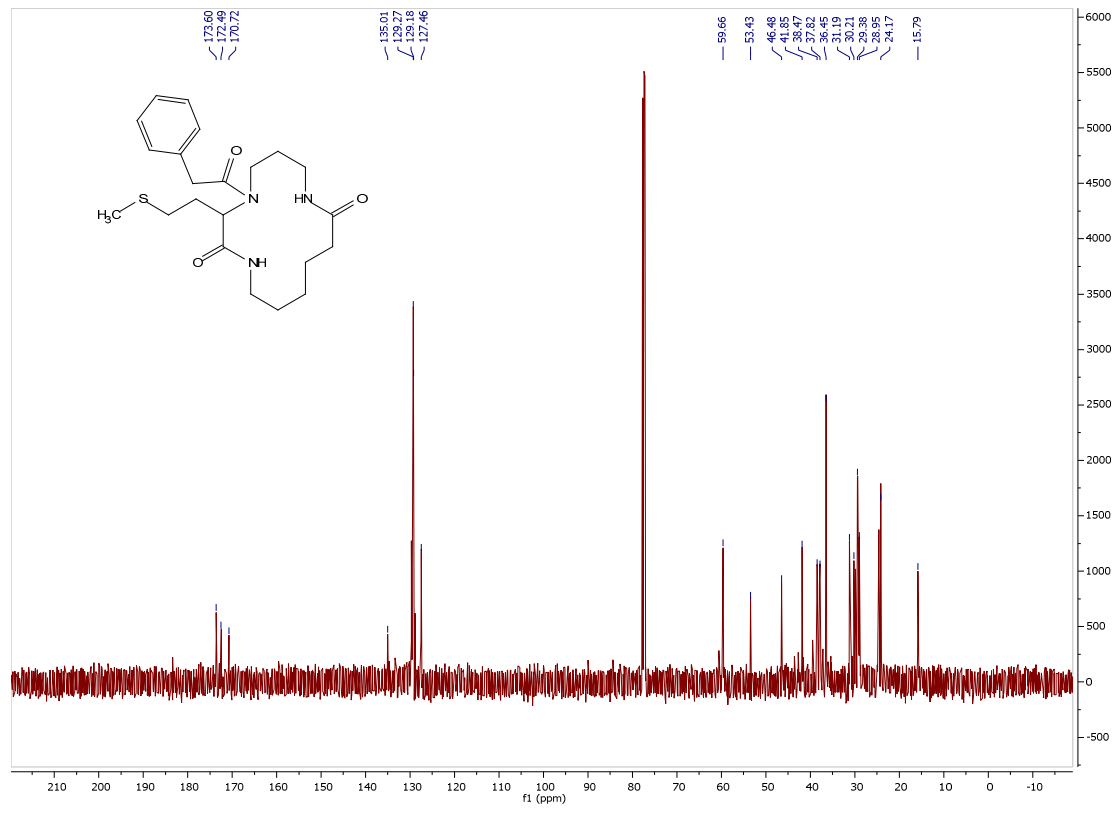

17mdv246-649a #28 RT: 0.12 AV: 1 NL: 1.49E8  
T: FTMS + p ESI Full ms [150.0000-1250.0000]

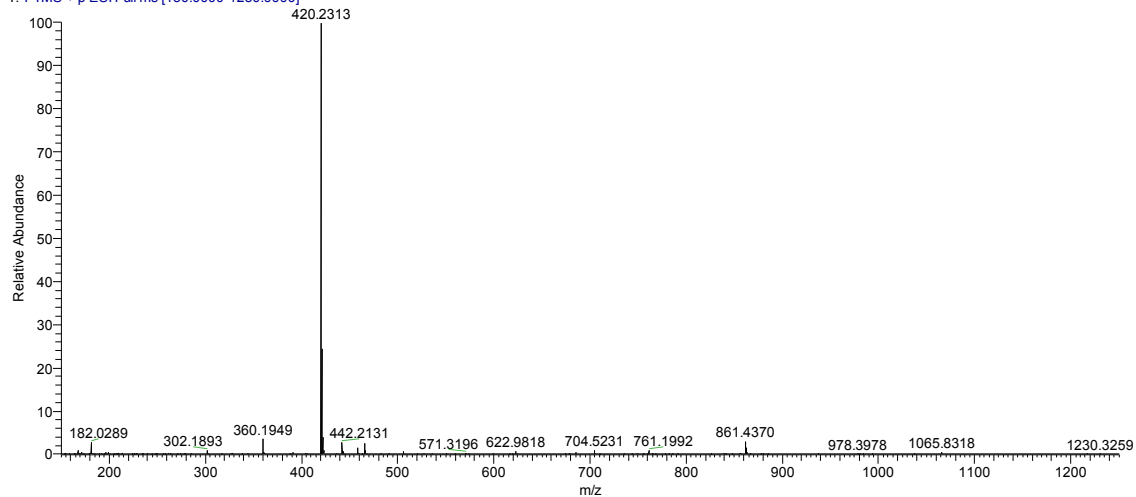

Compound 6d:

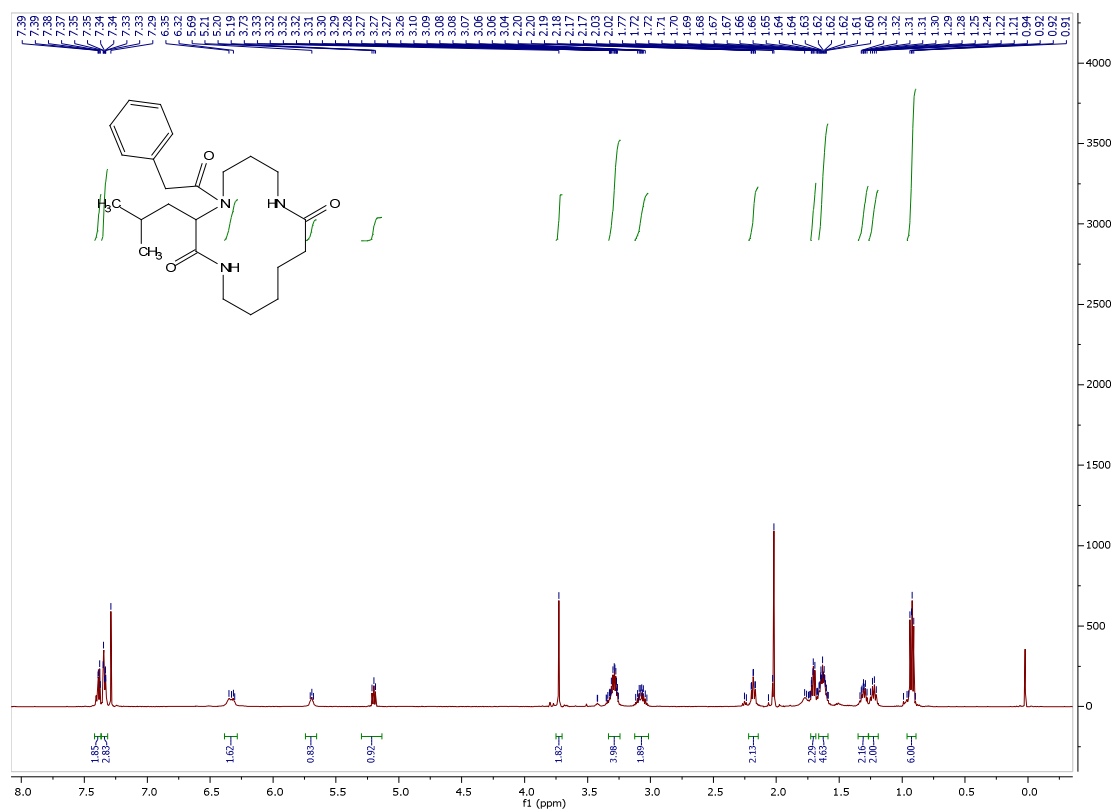

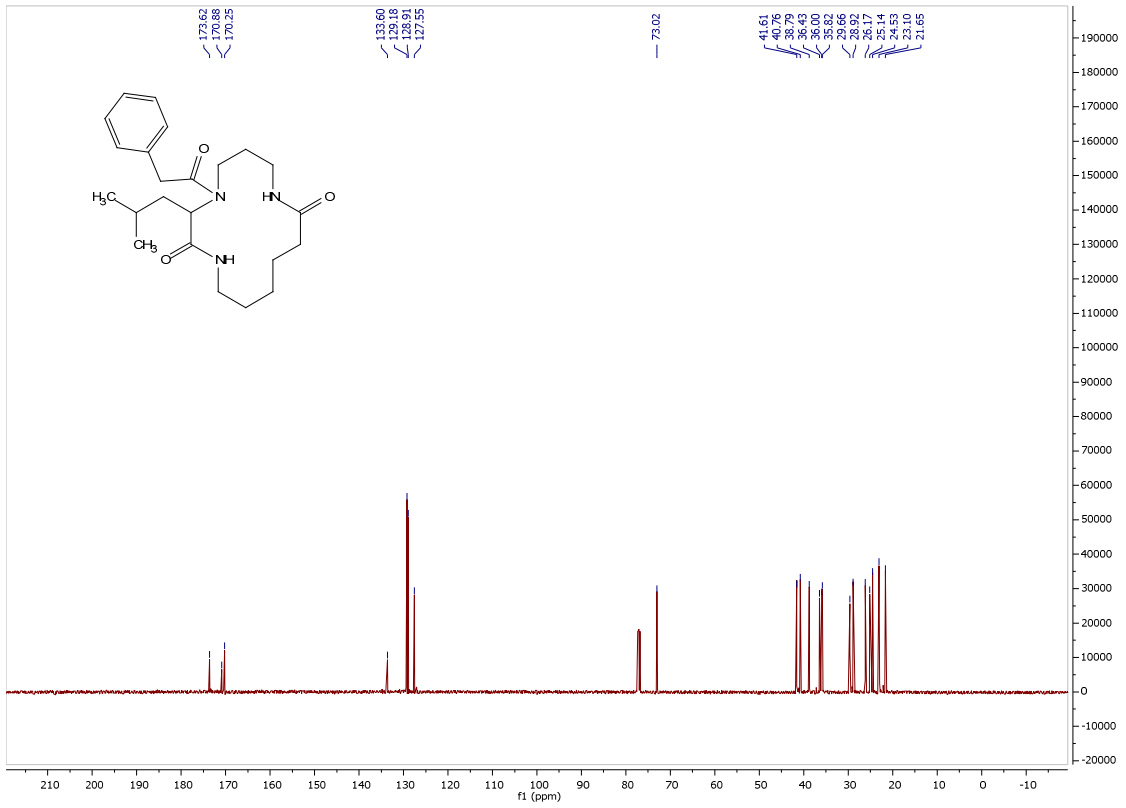

D:\XCALIBUR...17mdv246-440

11/29/17 15:57:22

17mdv246-440 #28 RT: 0.12 AV: 1 NL: 8.62E6  
T: FTMS + p ESI Full ms [150.0000-1250.0000]

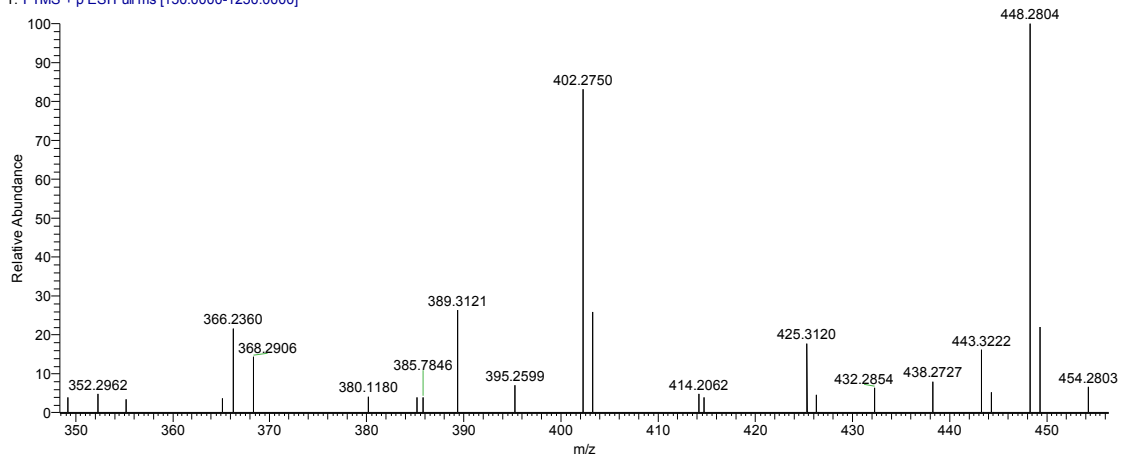



17mdv246-655a #28 RT: 0.12 AV: 1 NL: 4.68E7  
T: FTMS + p ESI Full ms [150.0000-1250.0000]

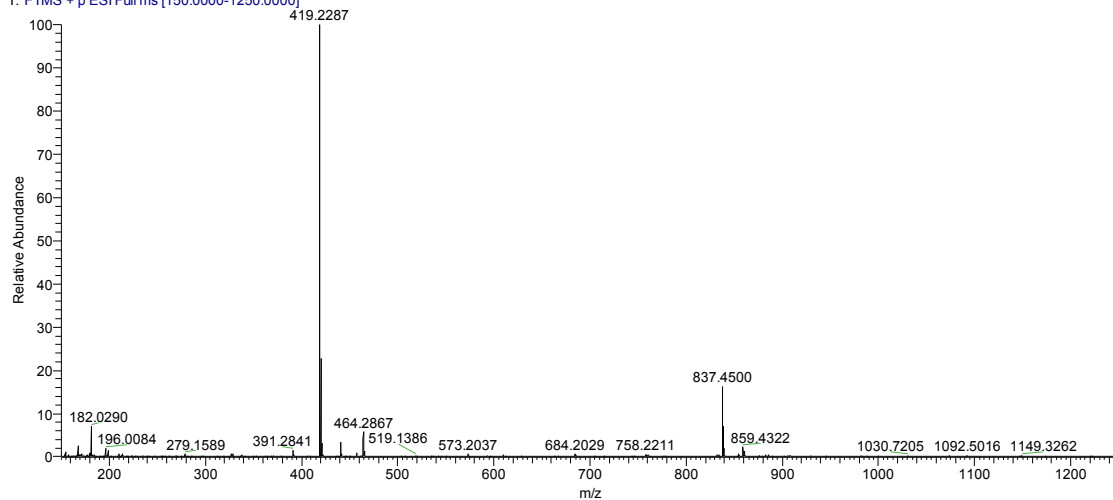

Compound 6f:

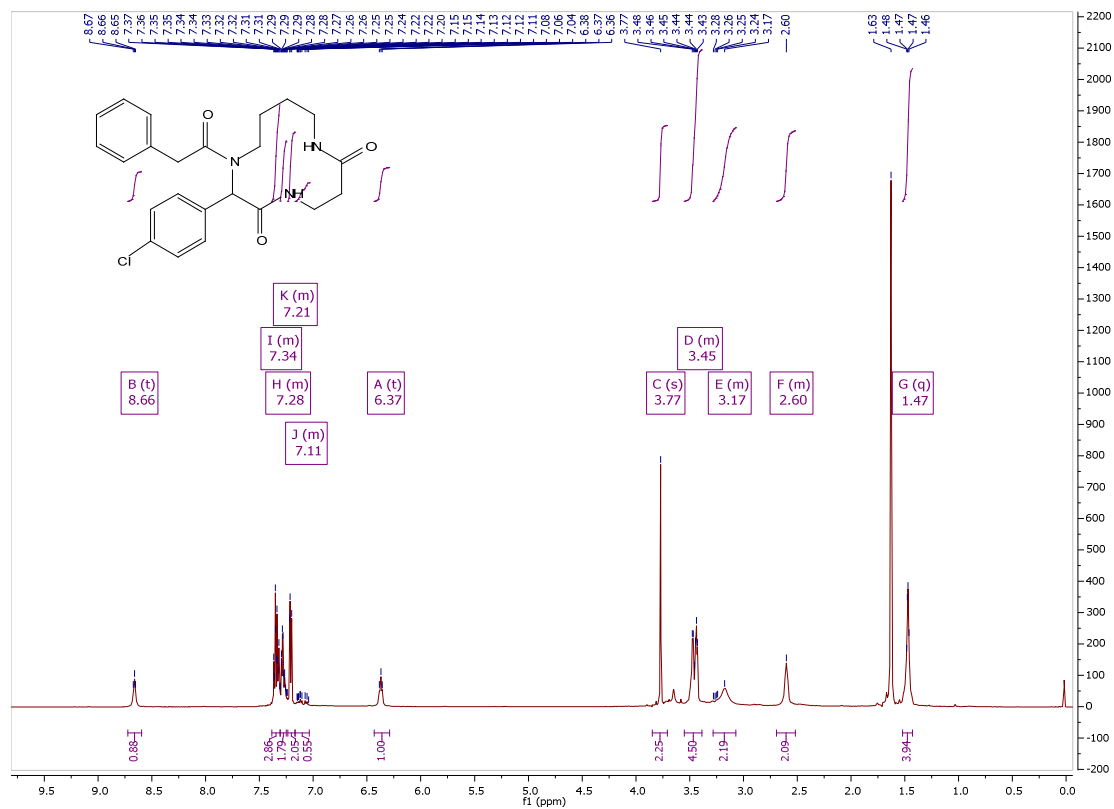

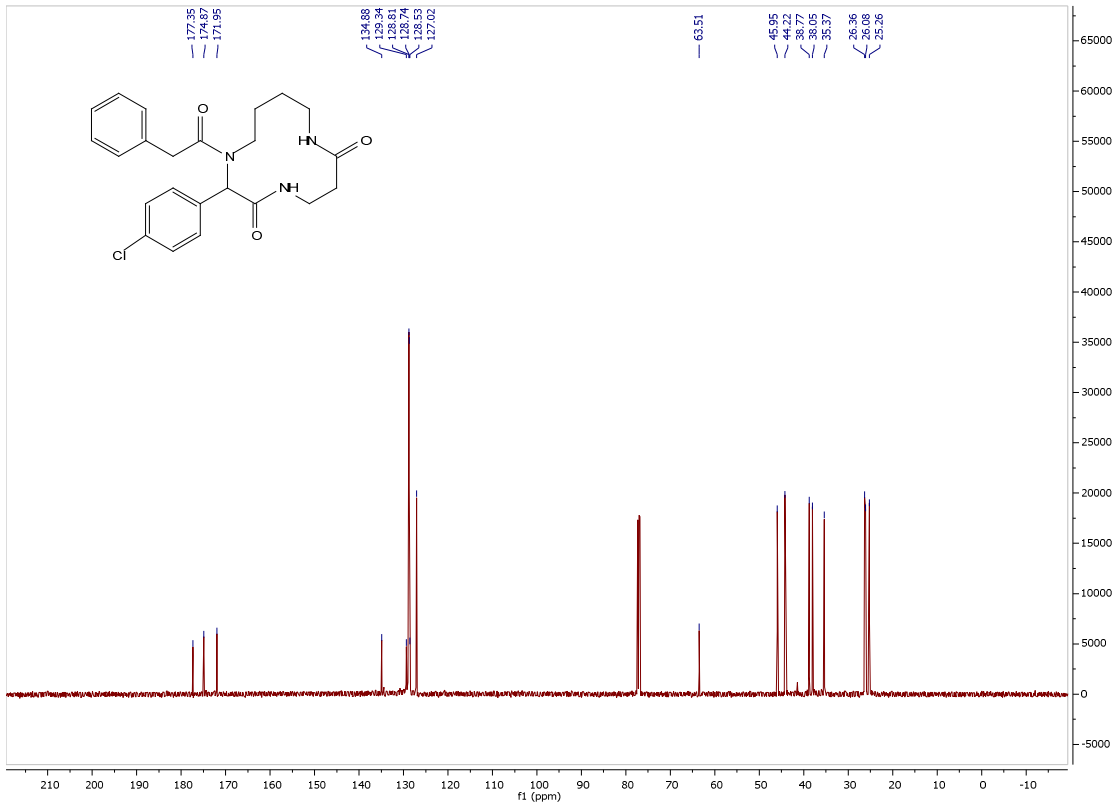

17mdv246-670b #28 RT: 0.12 AV: 1 NL: 4.28E7  
 T: FTMS + p ESI Full ms [150.0000-1250.0000]

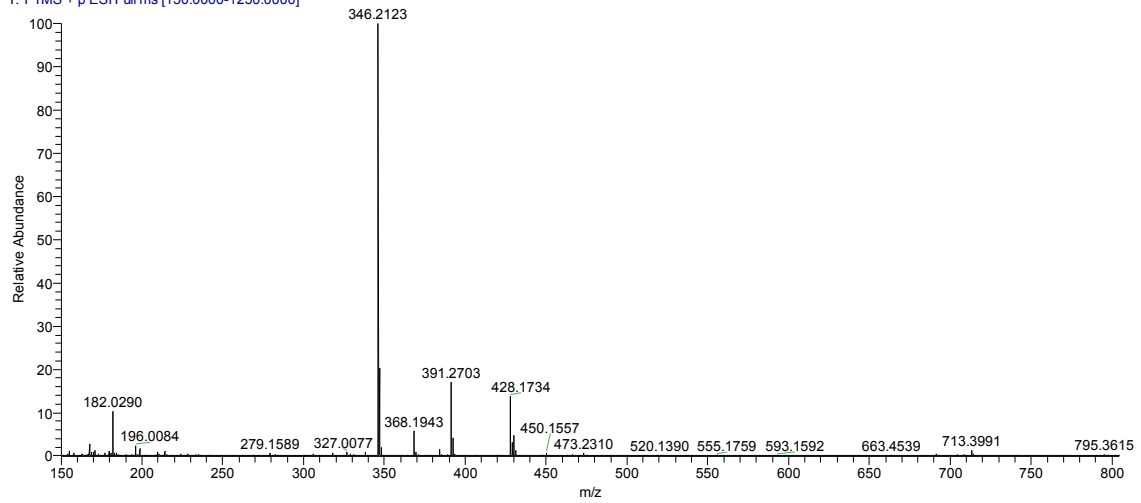

Compound 6g:

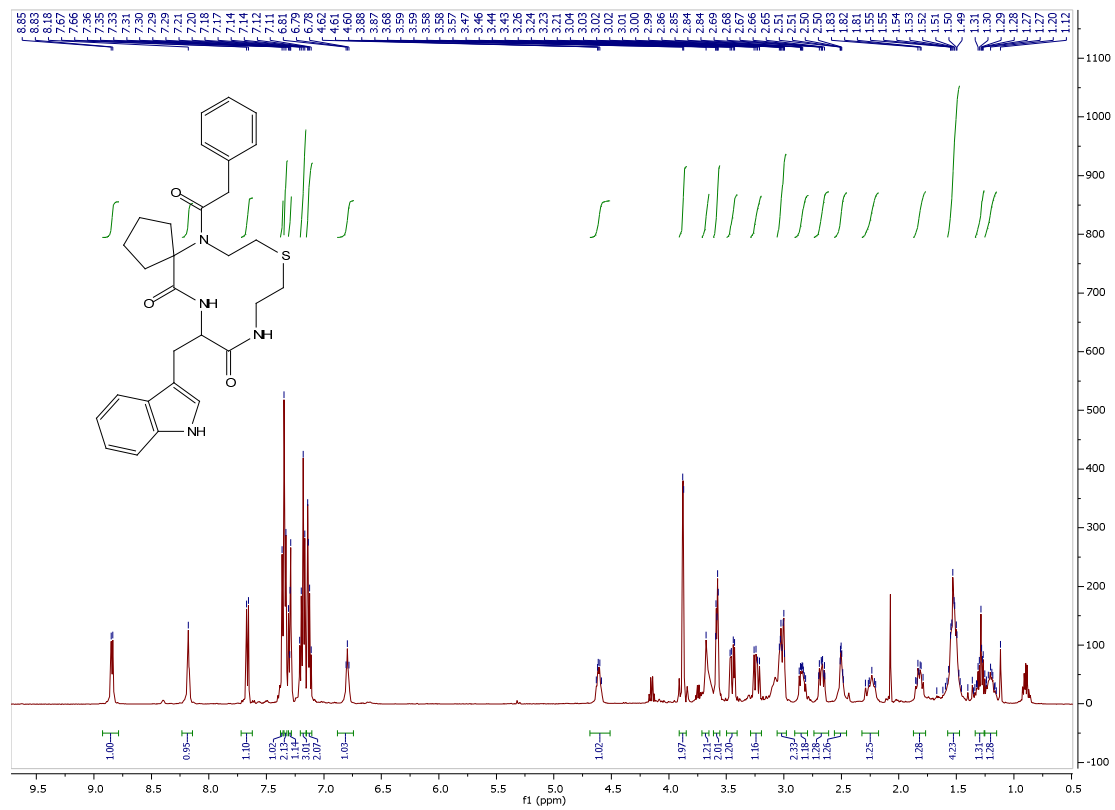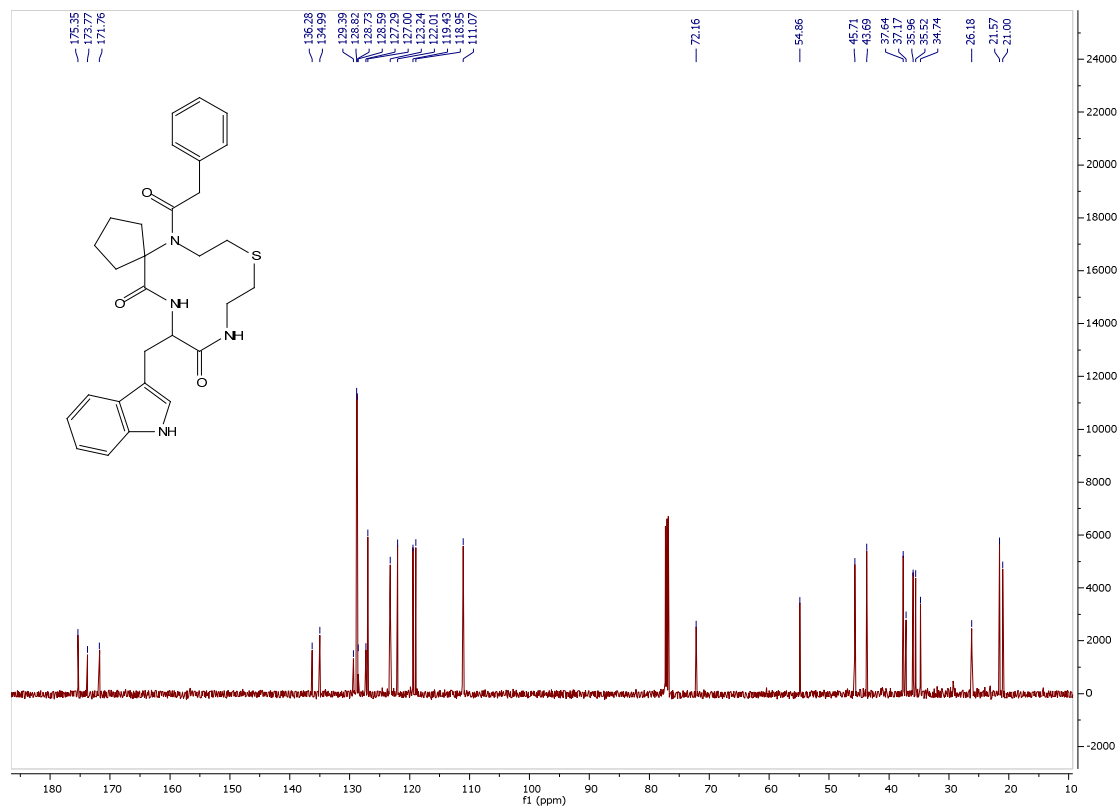



17mdv246-652a #28 RT: 0.12 AV: 1 NL: 5.22E7  
T: FTMS + p ESI Full ms [150.0000-1250.0000]

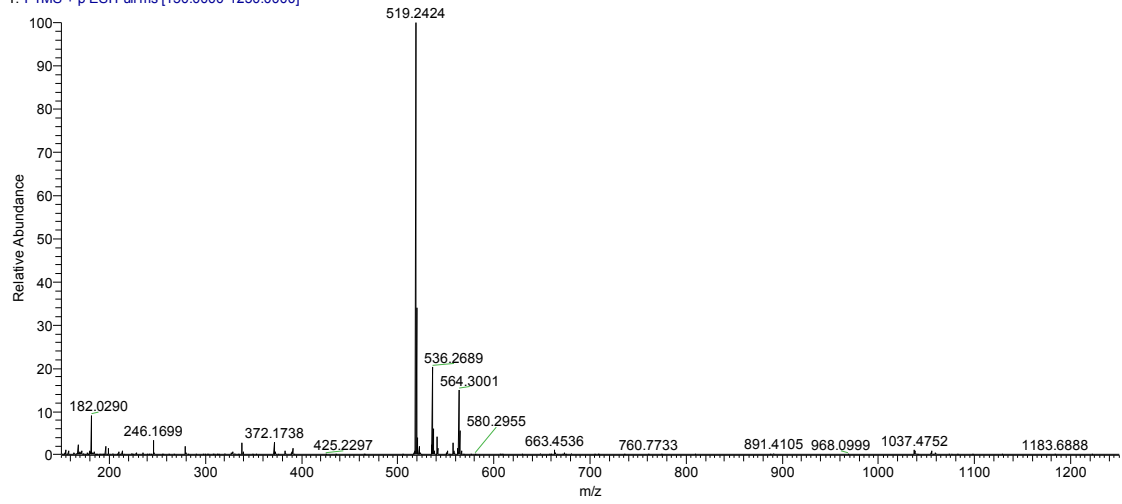

Compound 6h:

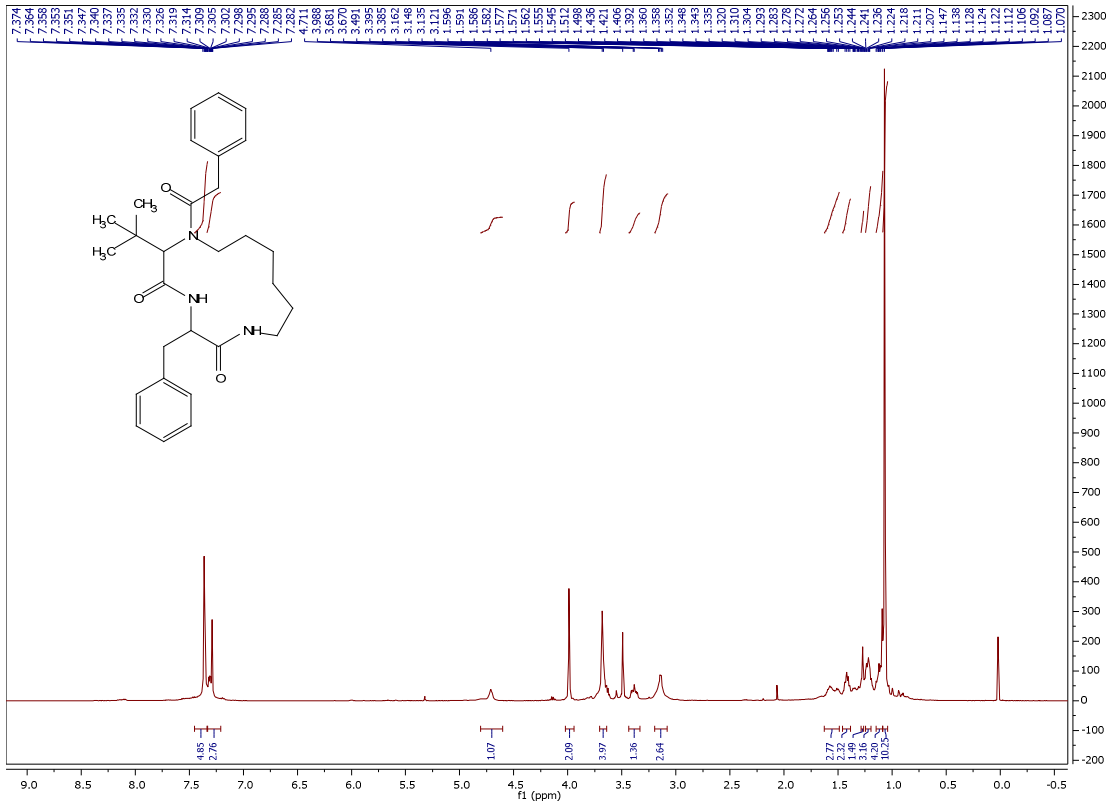

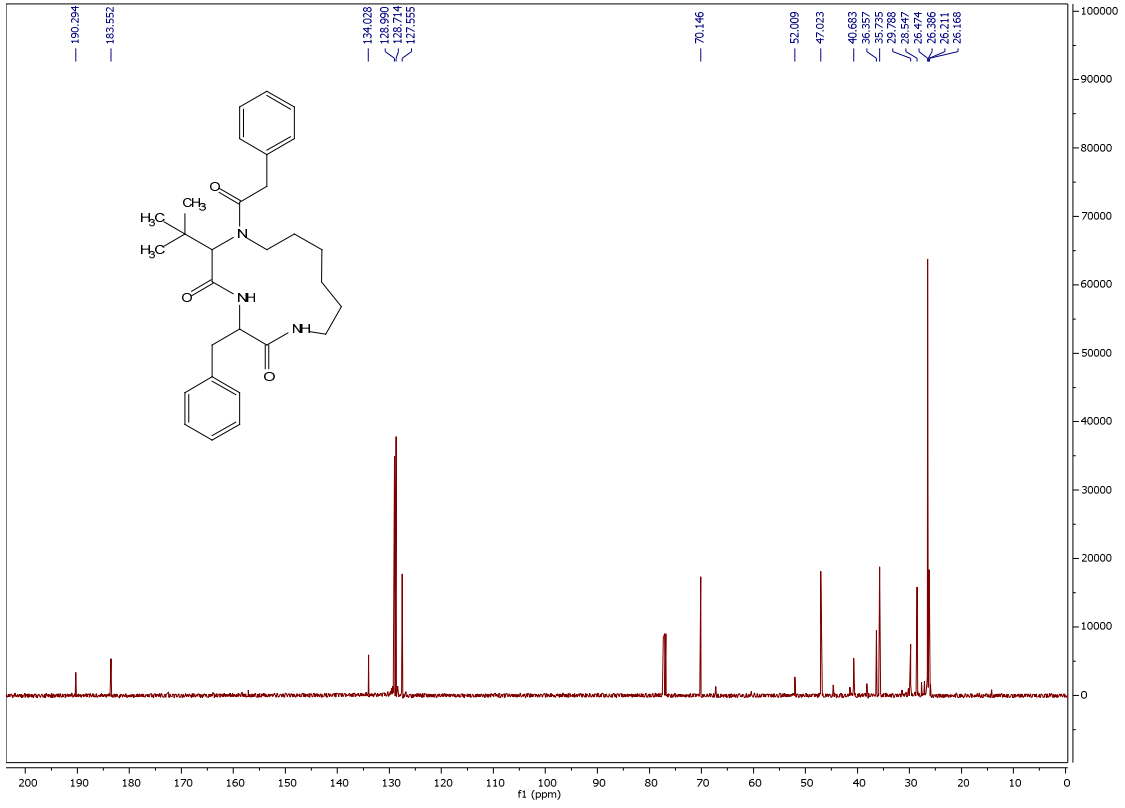

17mdv246-664b #28 RT: 0.12 AV: 1 NL: 1.67E6  
 T: FTMS + p ESI Full ms [150.0000-1250.0000]

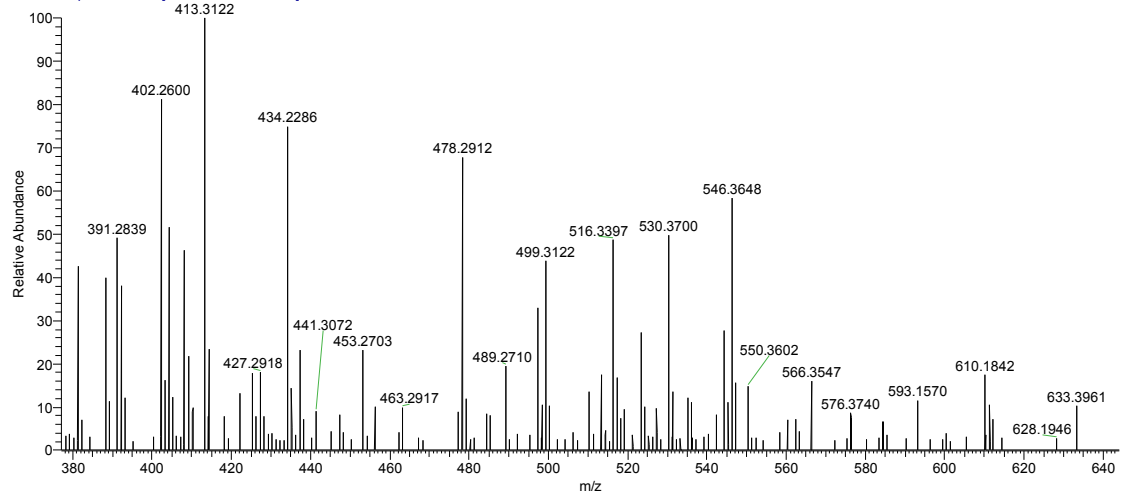

Compound 6i:

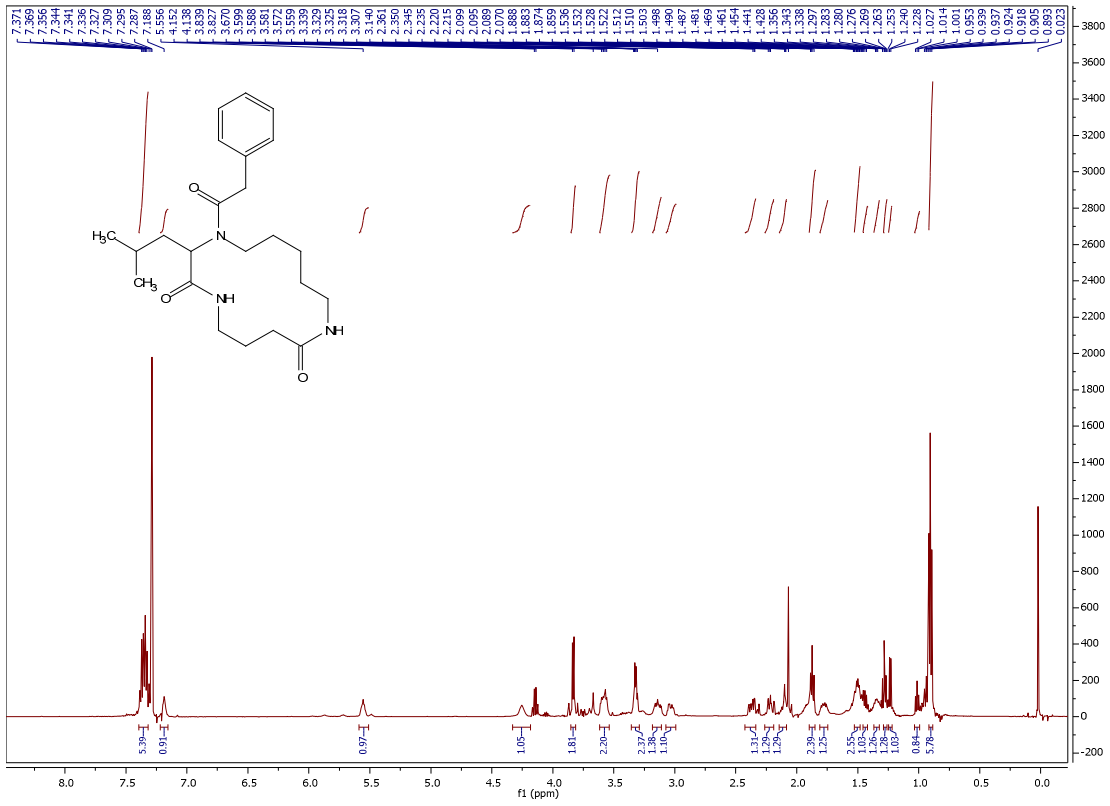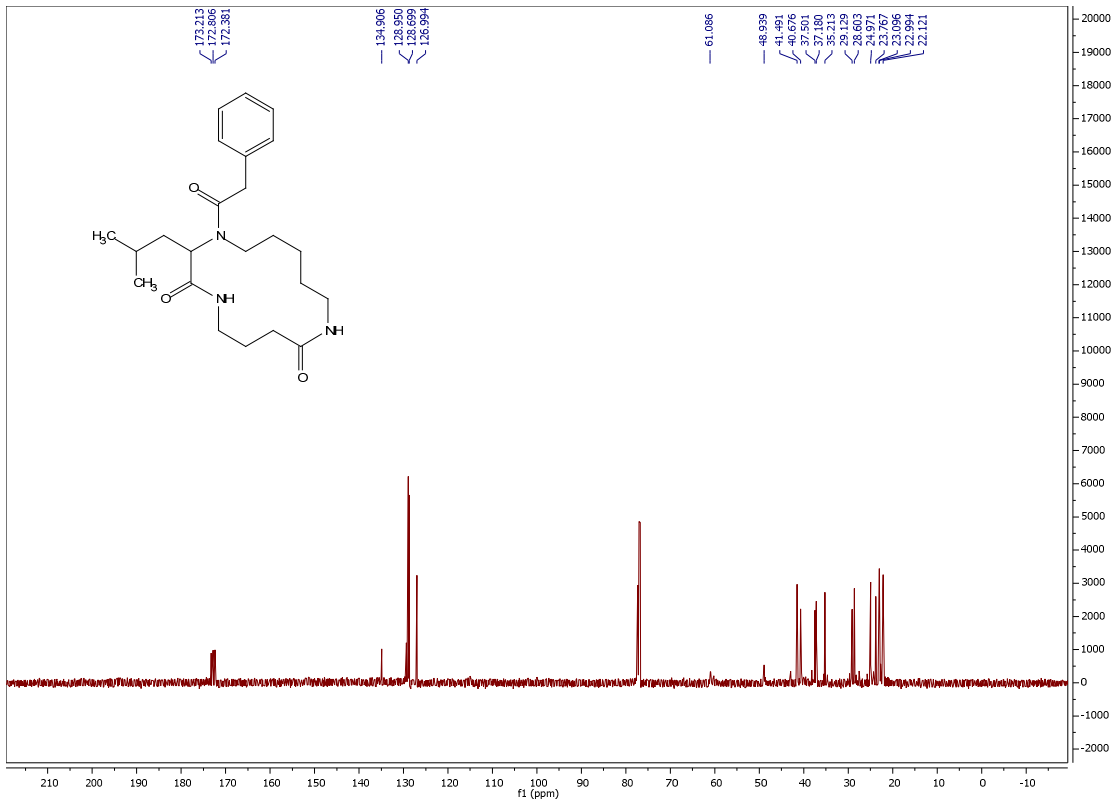

17mdv246-dp22 #28 RT: 0.12 AV: 1 NL: 3.91E8  
T: FTMS + p ESI Full ms [150.0000-1250.0000]

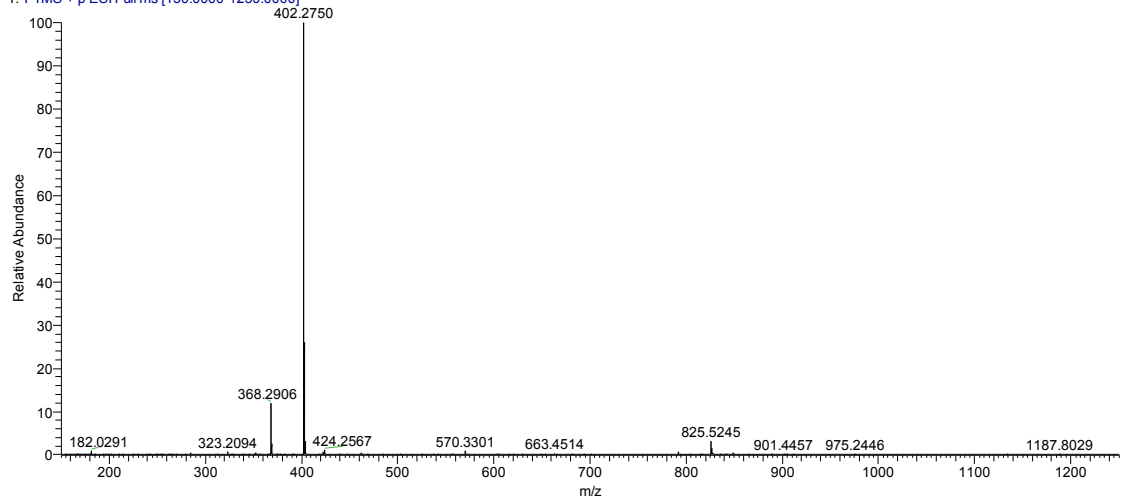

Compound 6j:

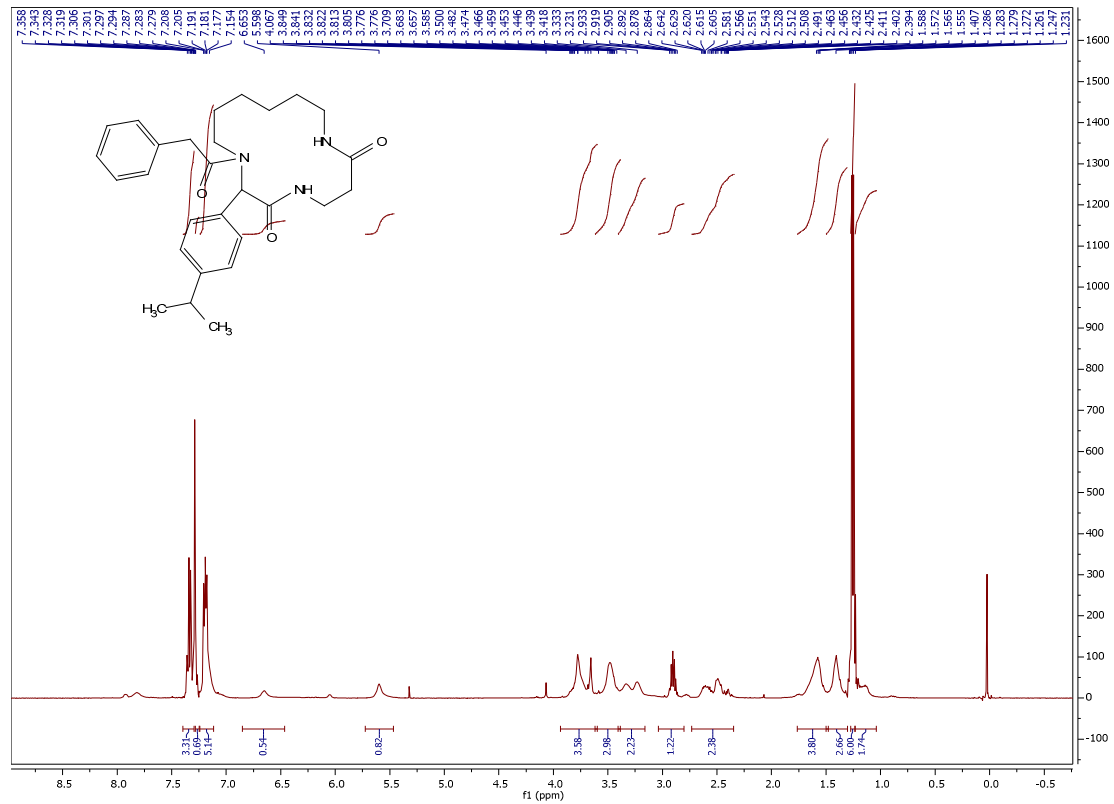

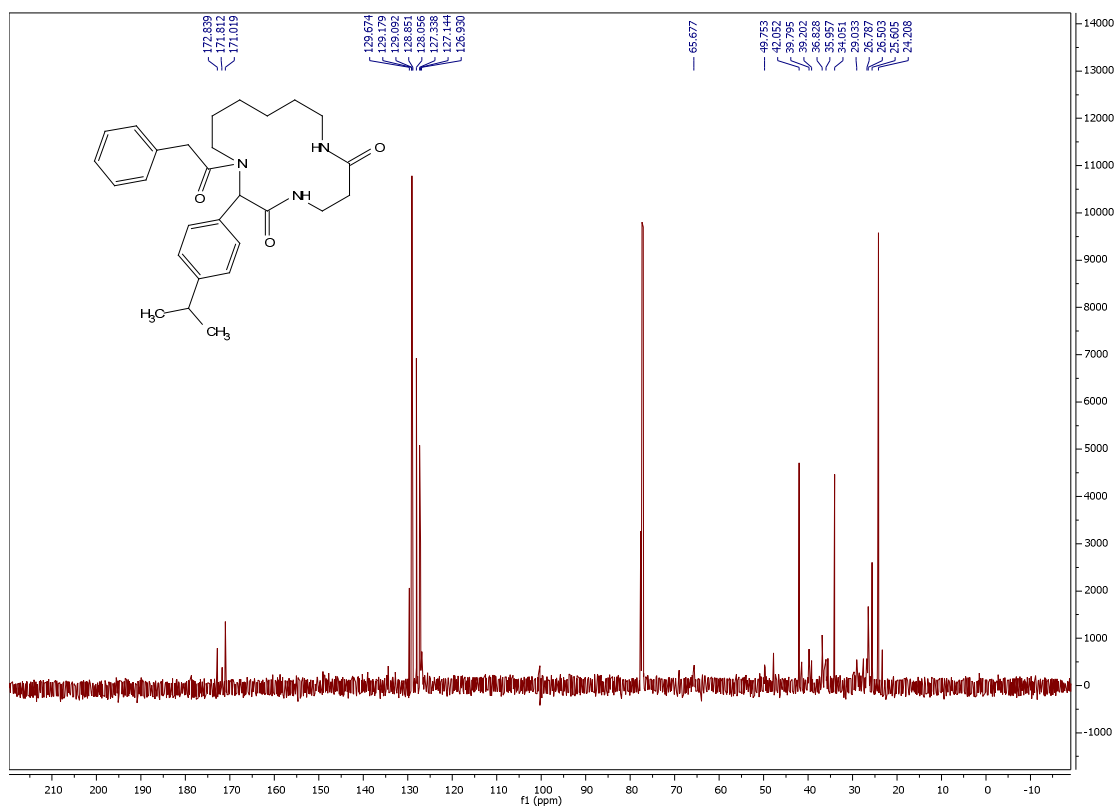

17mdv246-667a #28 RT: 0.12 AV: 1 NL: 1.53E8  
 T: FTMS + p ESI Full ms [150.0000-1250.0000]

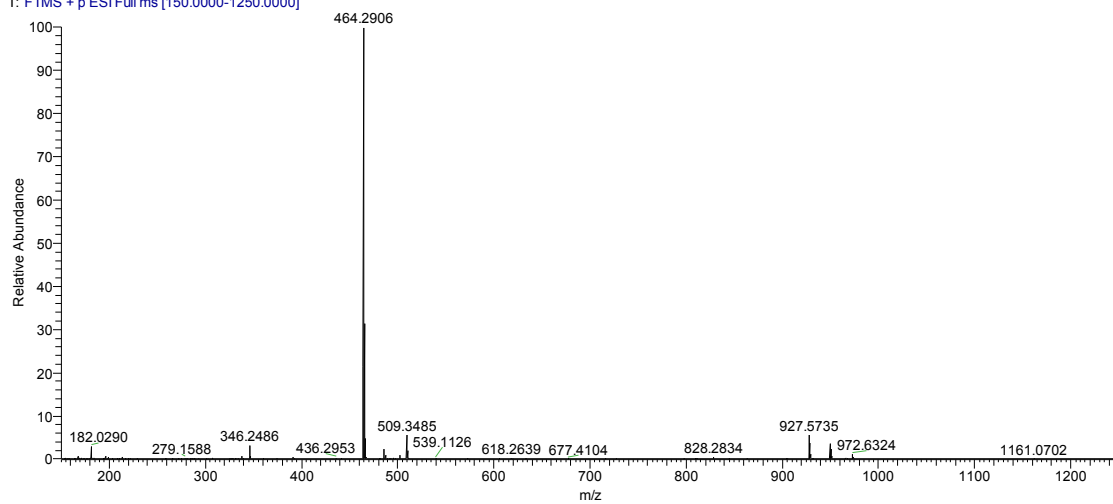

Compound 6k:

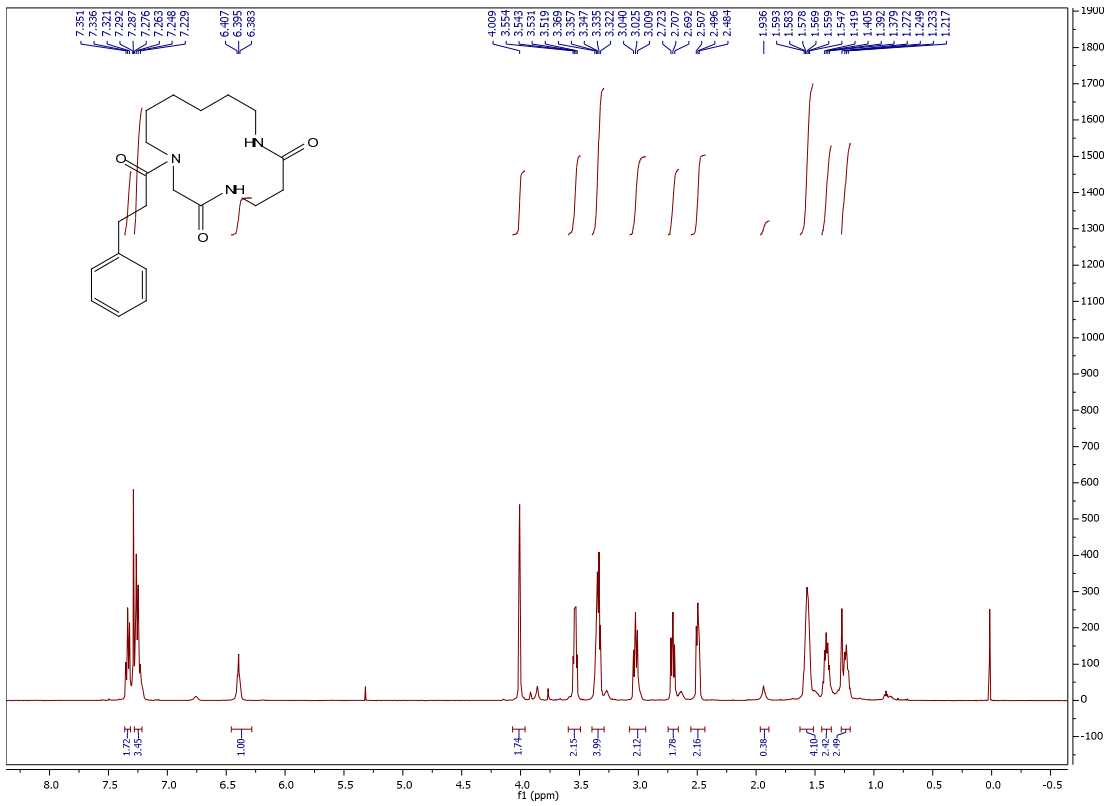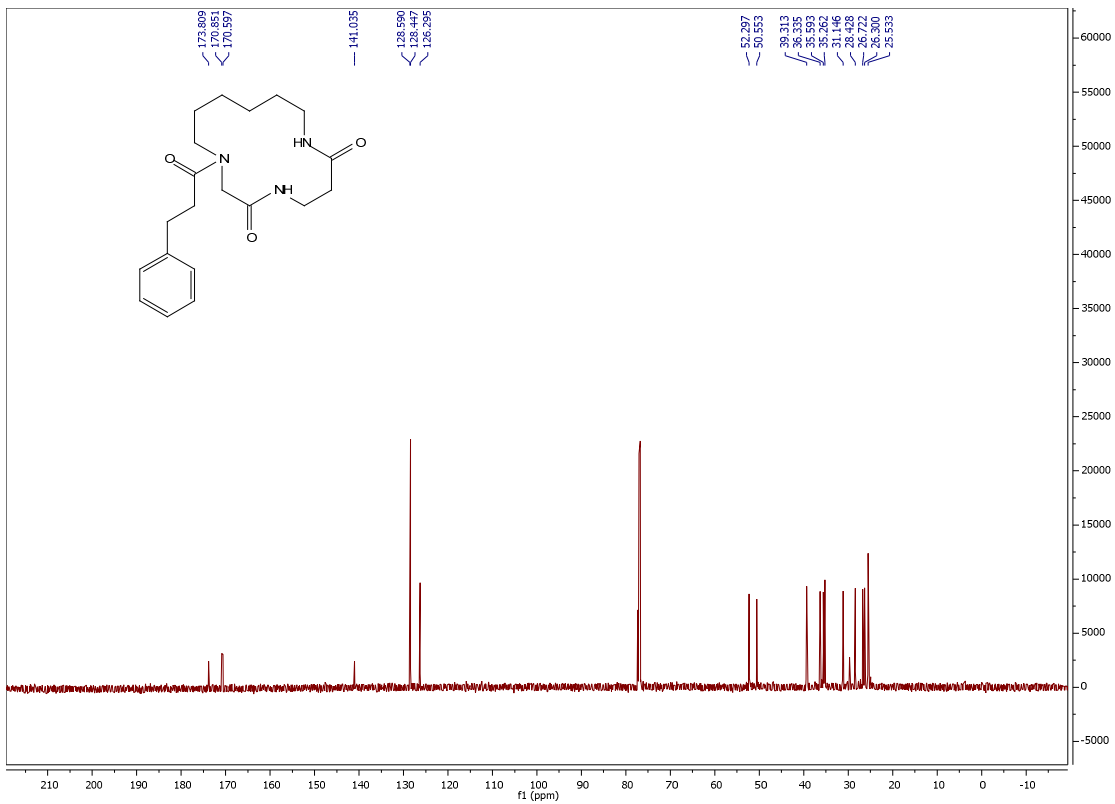

17mdv246-667b #28 RT: 0.12 AV: 1 NL: 9.15E7  
T: FTMS + p ESI Full ms [150.0000-1250.0000]

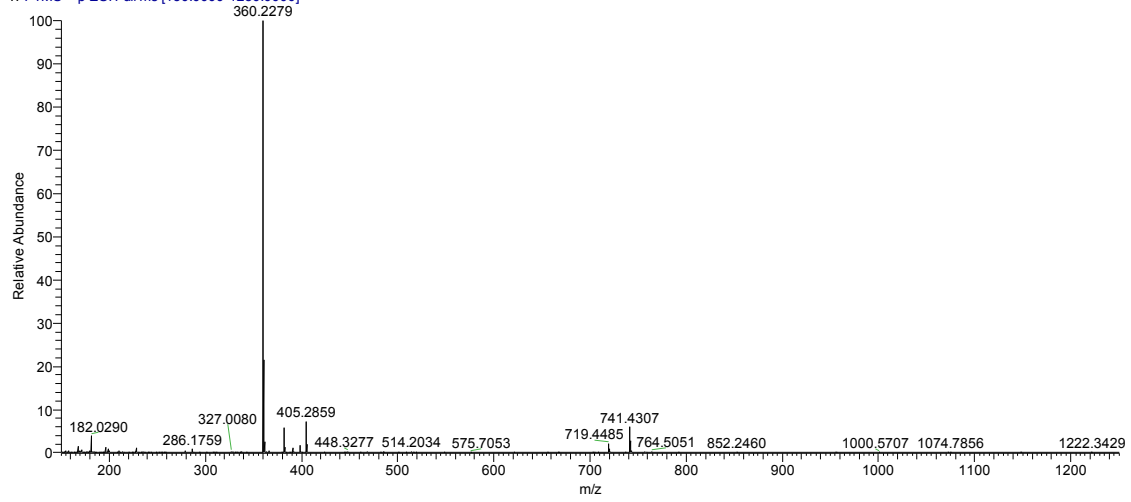

Compound 6l:

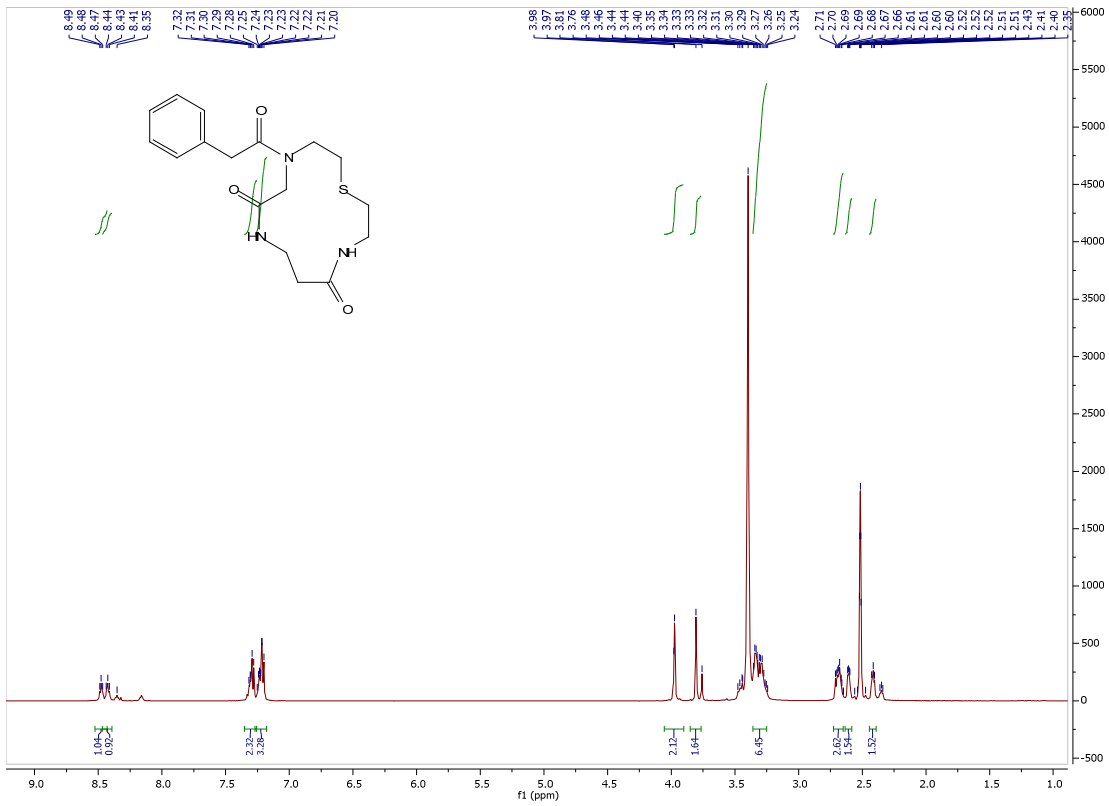

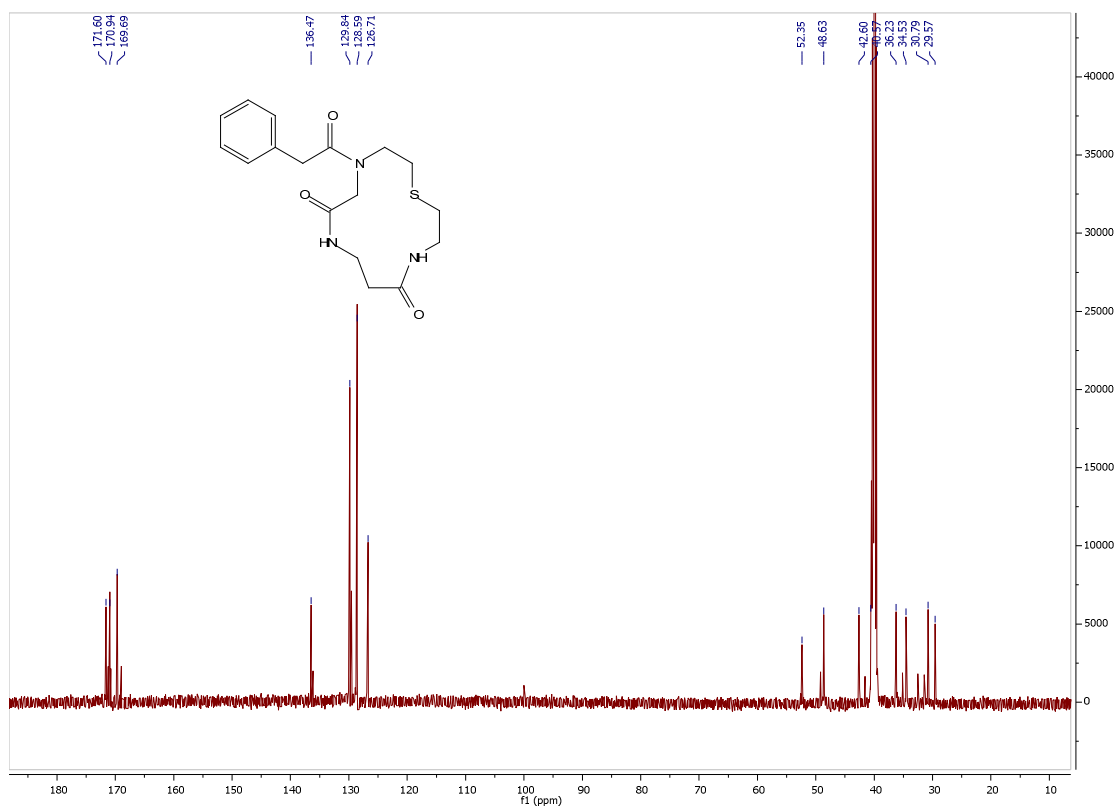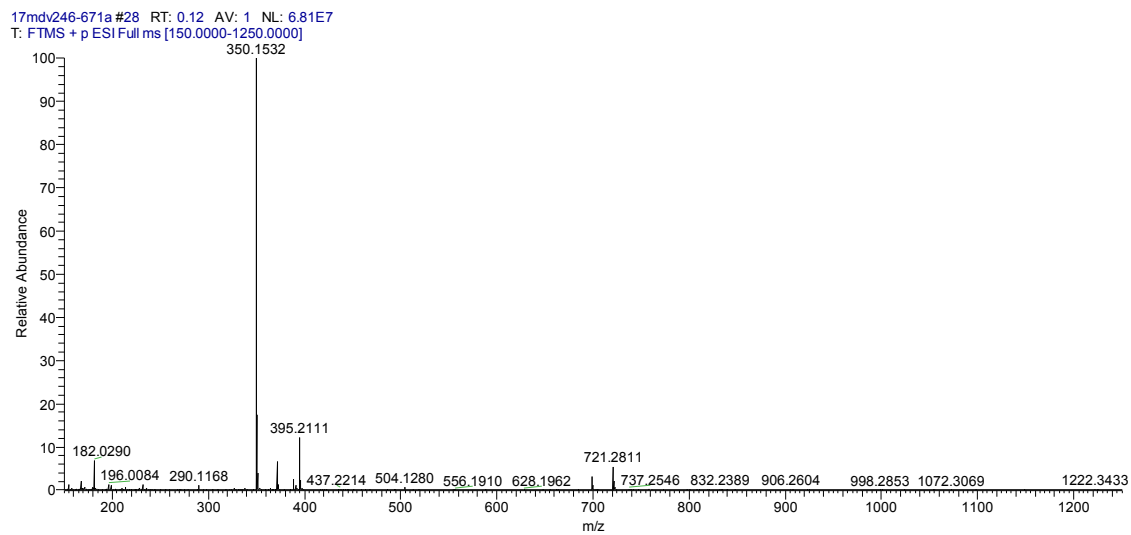

Compound 6m:



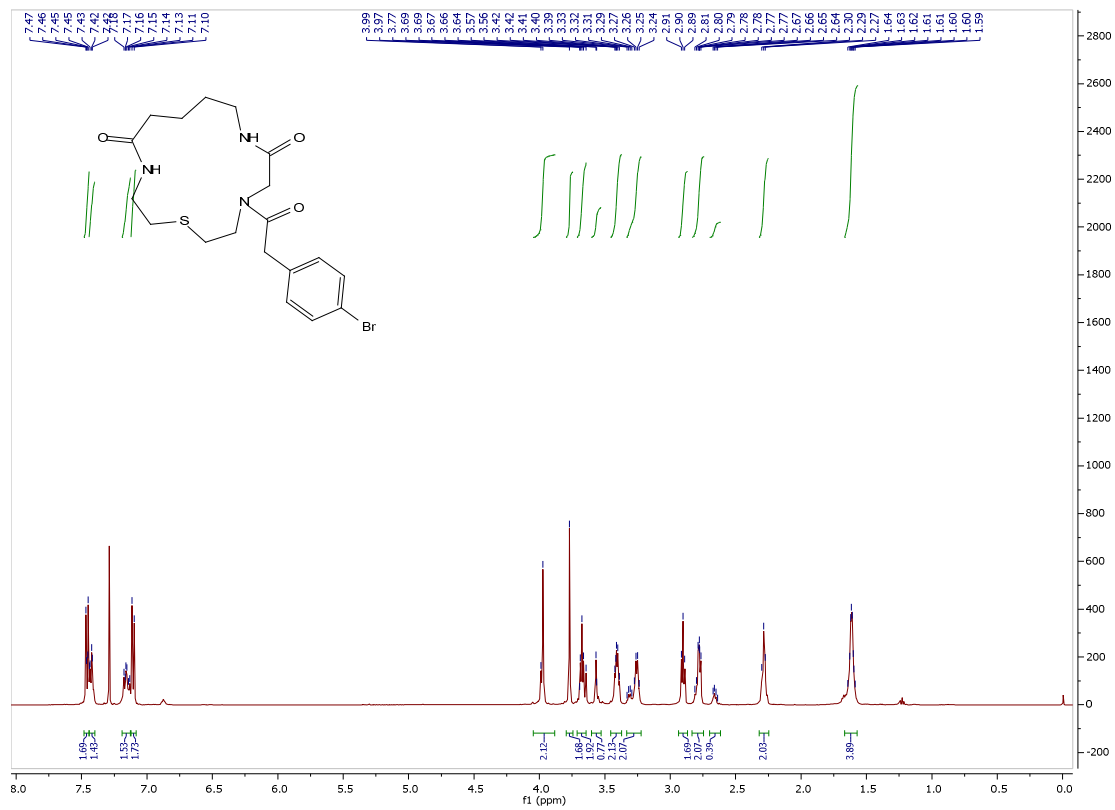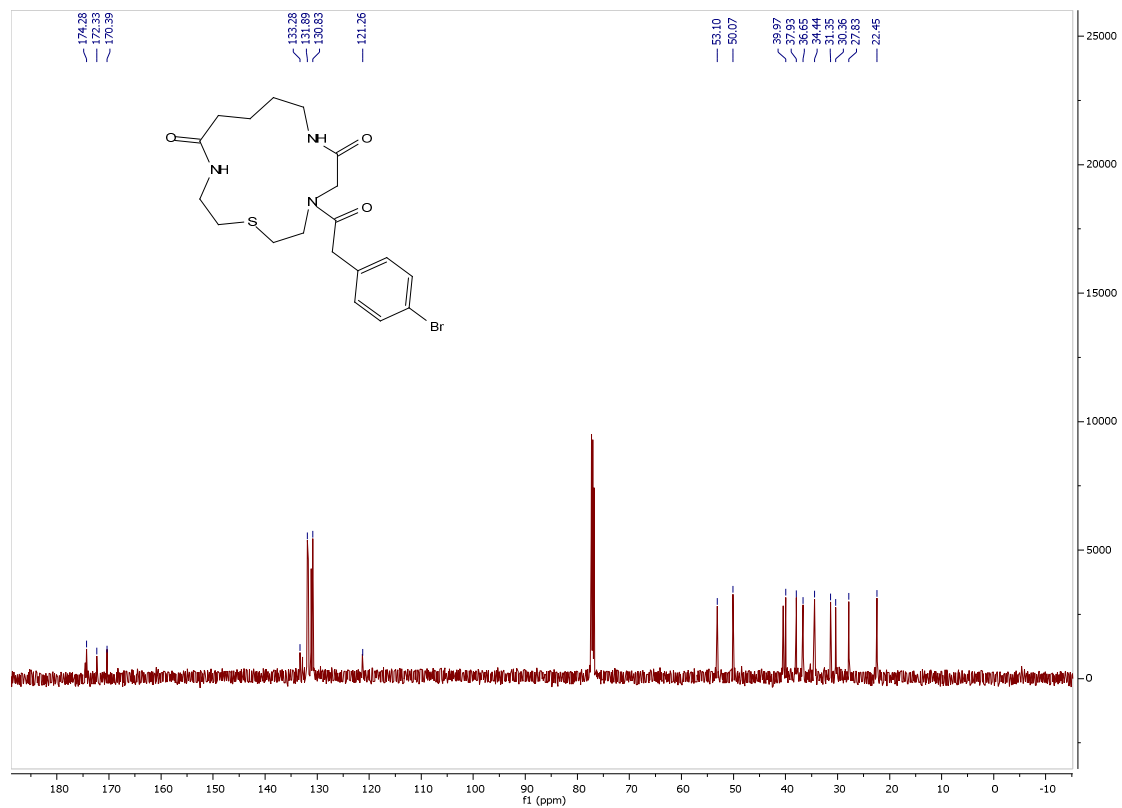

17mdv246-676a #28 RT: 0.12 AV: 1 NL: 4.29E7  
T: FTMS + p ESI Full ms [150.0000-1250.0000]

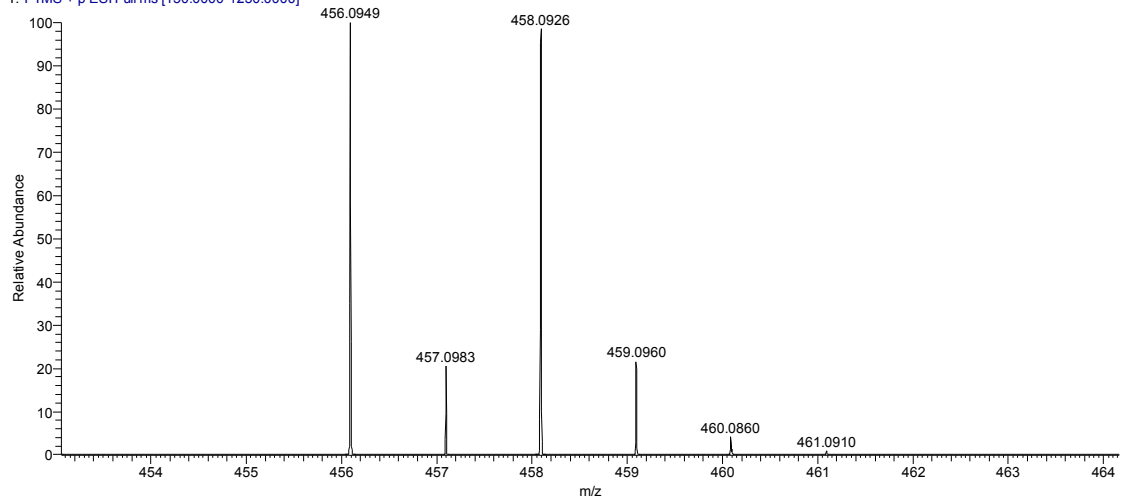

Compound 6n:

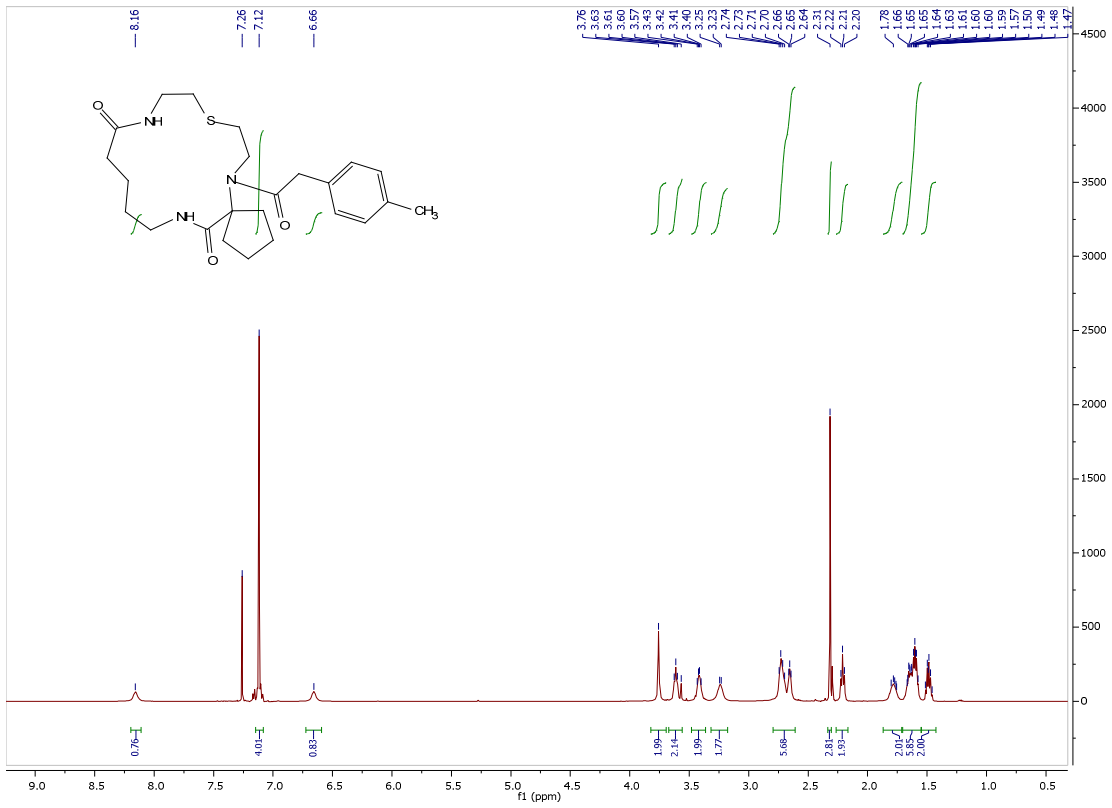

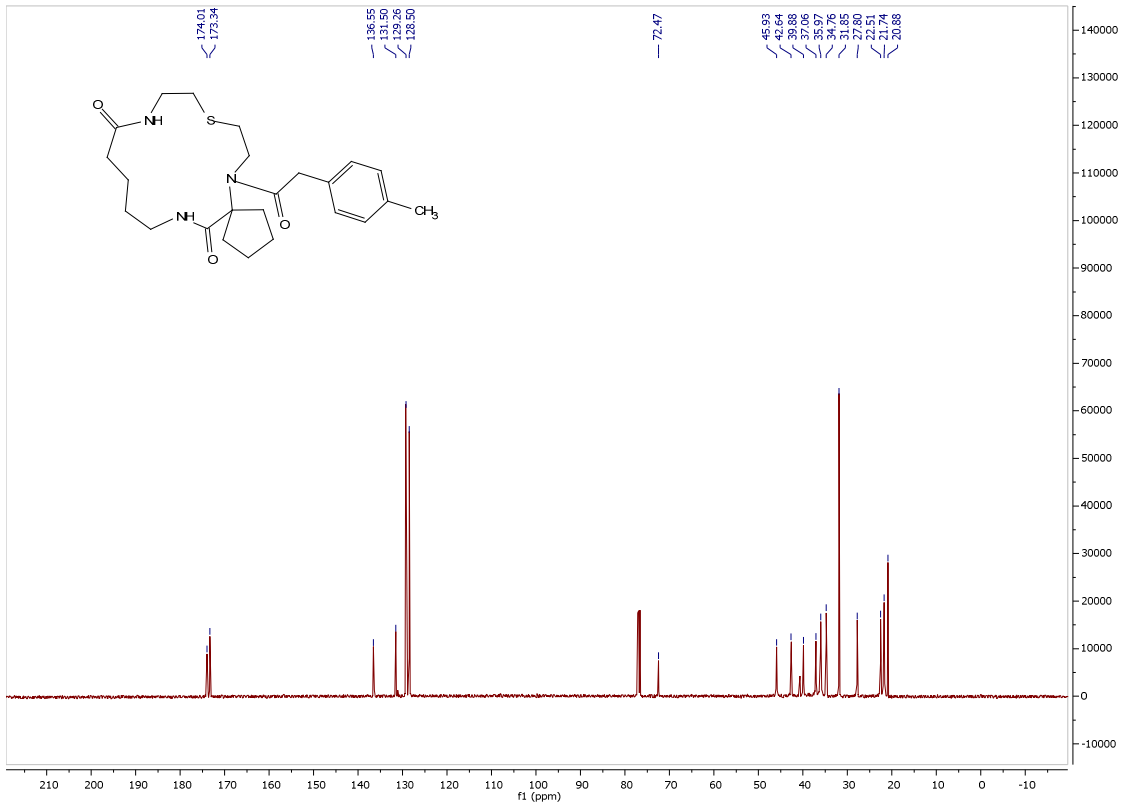

17mdv246-676b #28 RT: 0.12 AV: 1 NL: 2.96E8  
 T: FTMS + p ESI Full ms [150.0000-1250.0000]

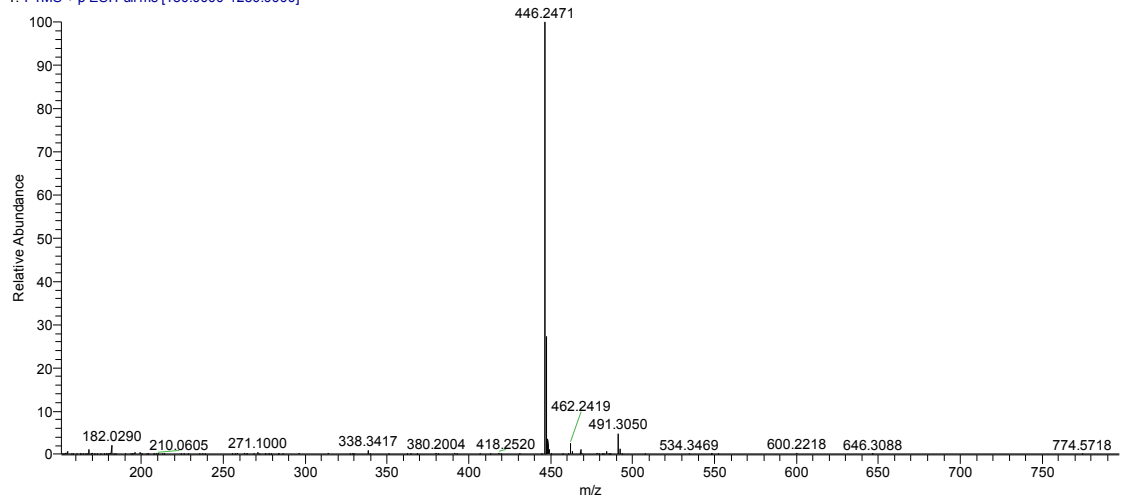

Compound 6o:

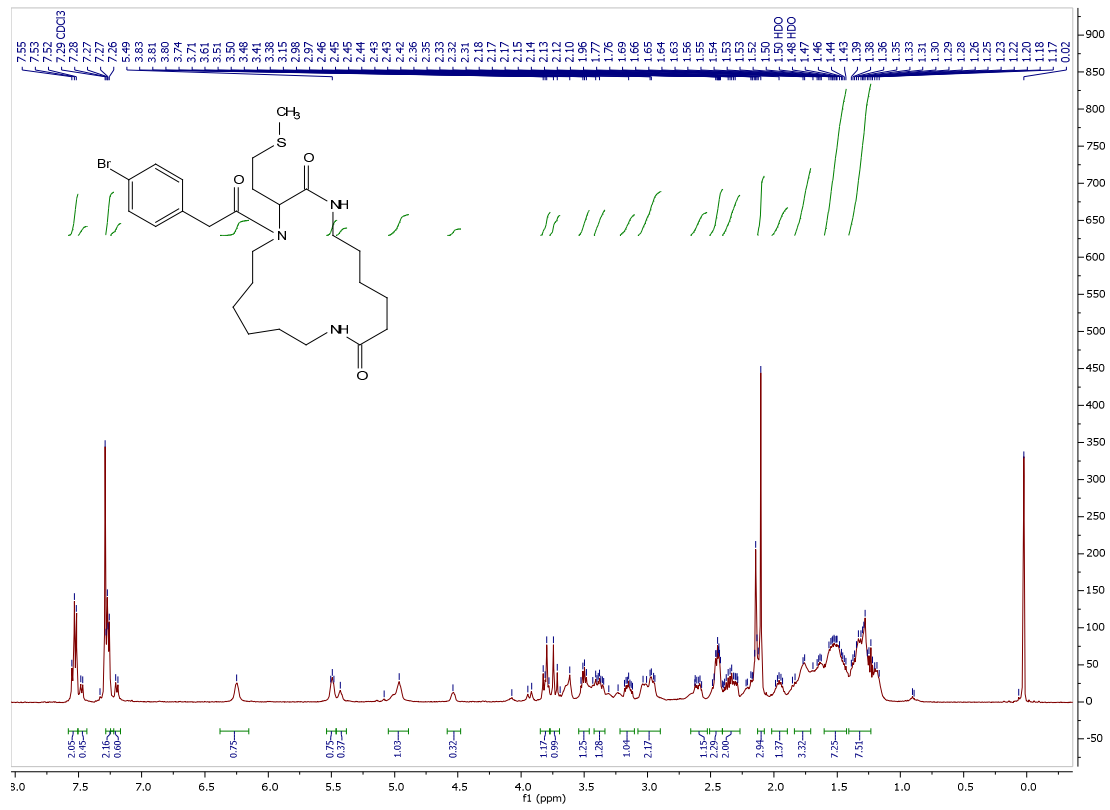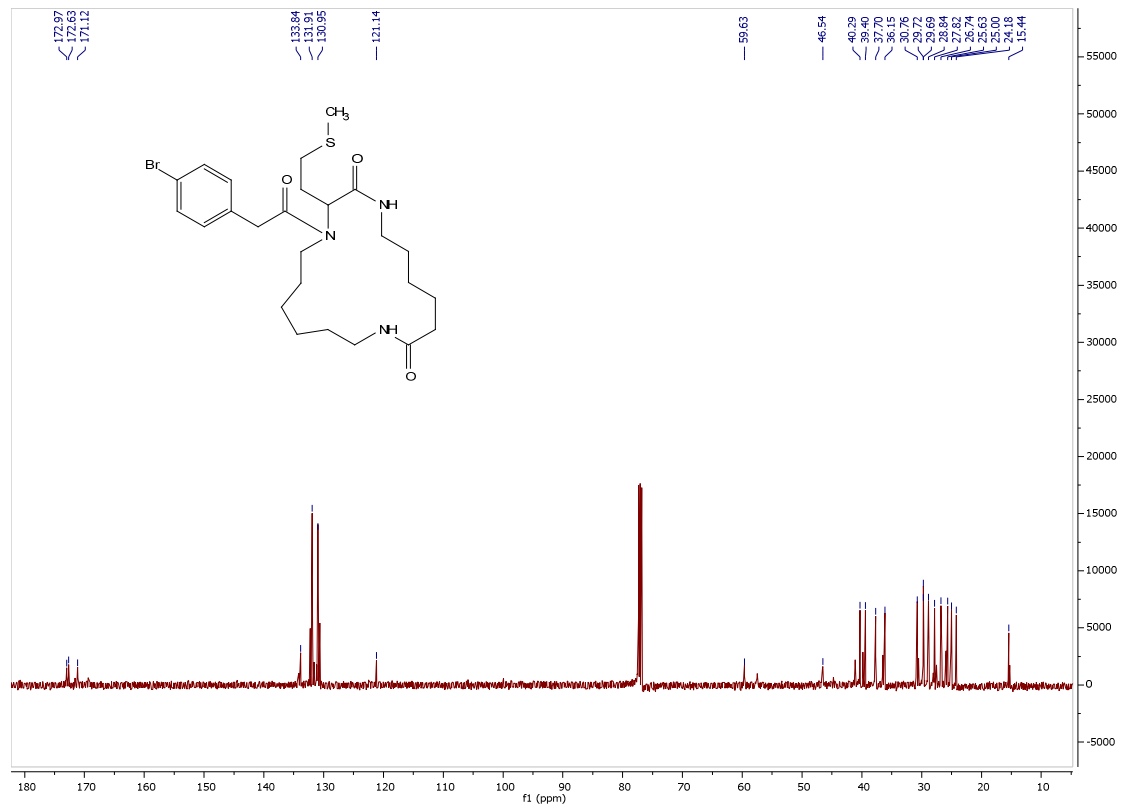

17mdv246-707a #28 RT: 0.12 AV: 1 NL: 1.17E8  
T: FTMS + p ESI Full ms [150.0000-1250.0000]

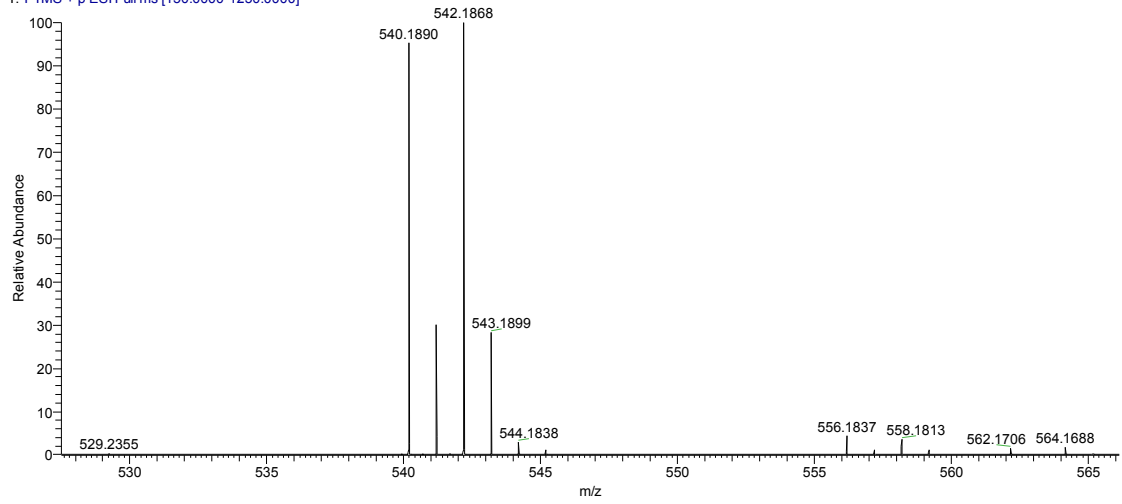

Compound 7a:

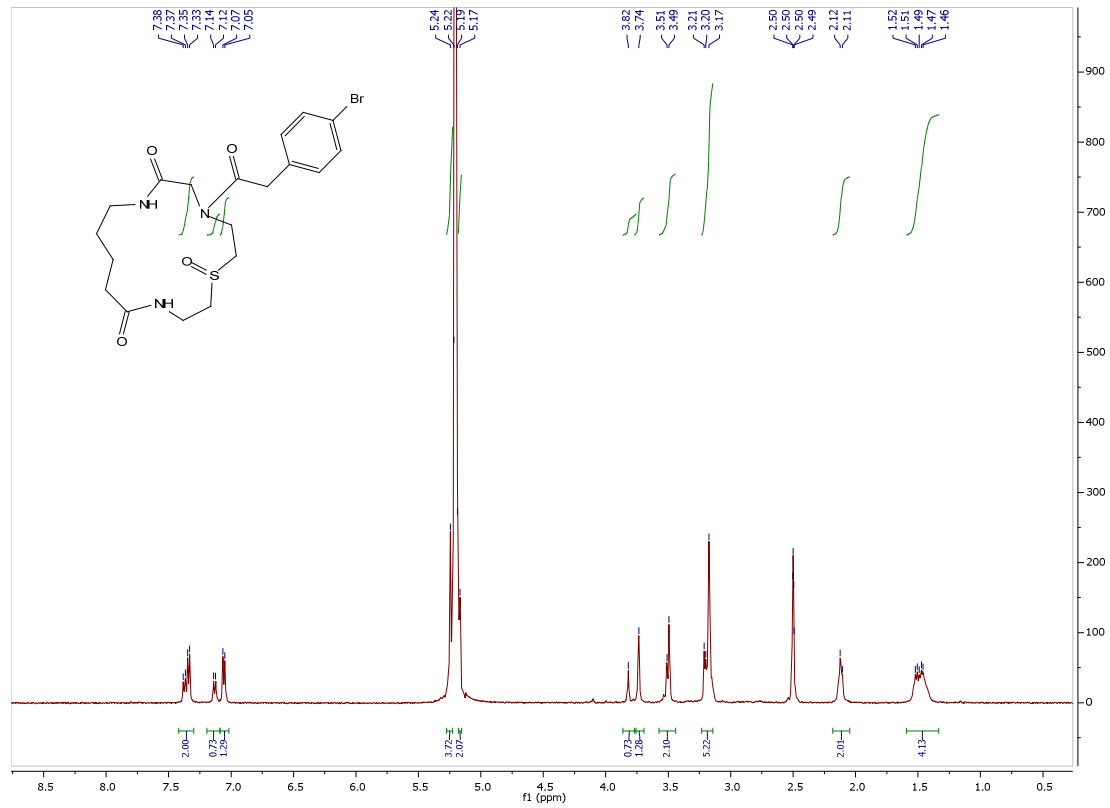

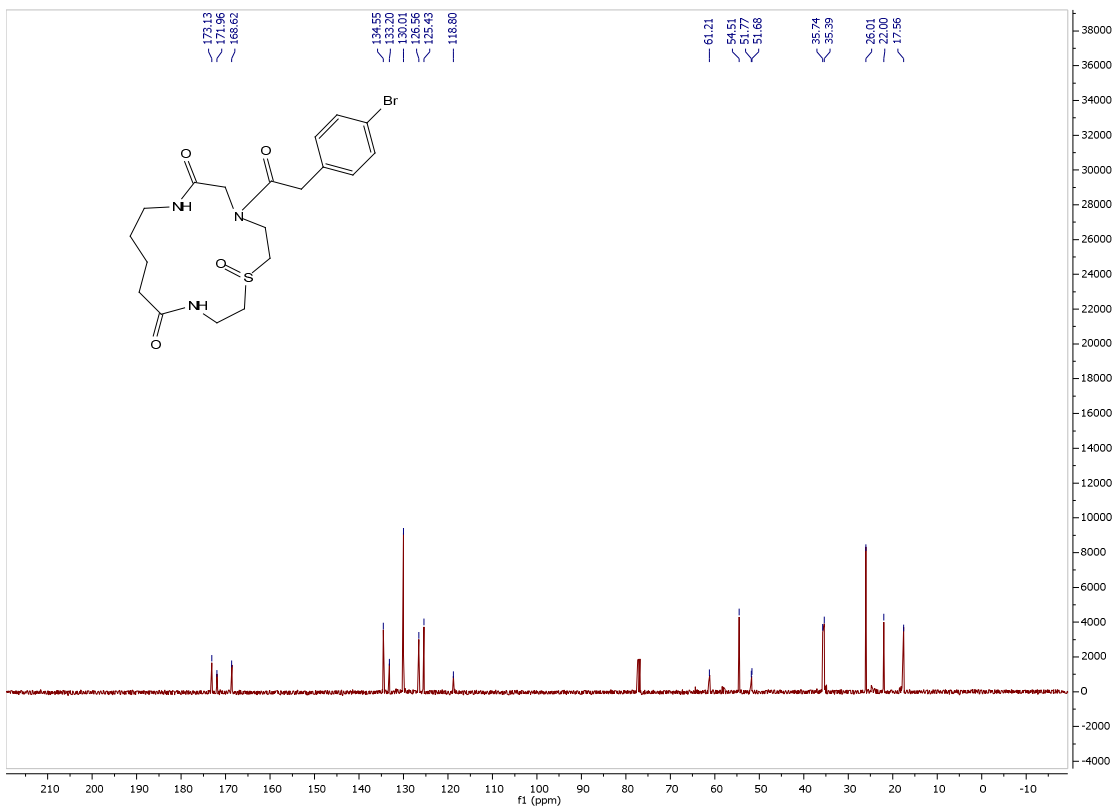

17mdv246-676c-c-f33 #28 RT: 0.12 AV: 1 NL: 1.79E7  
 T: FTMS + p ESI Full ms [150.0000-1250.0000]

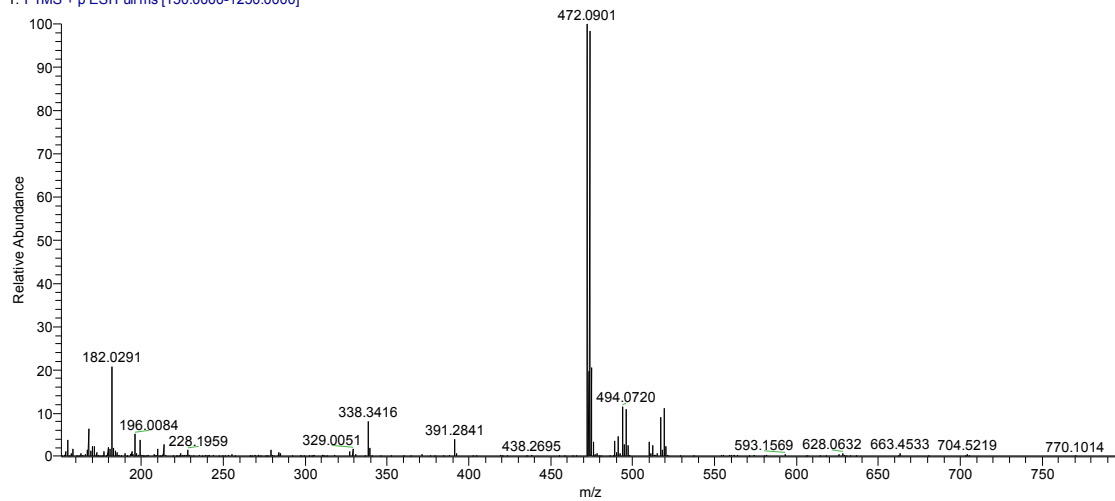

Compound 7b:

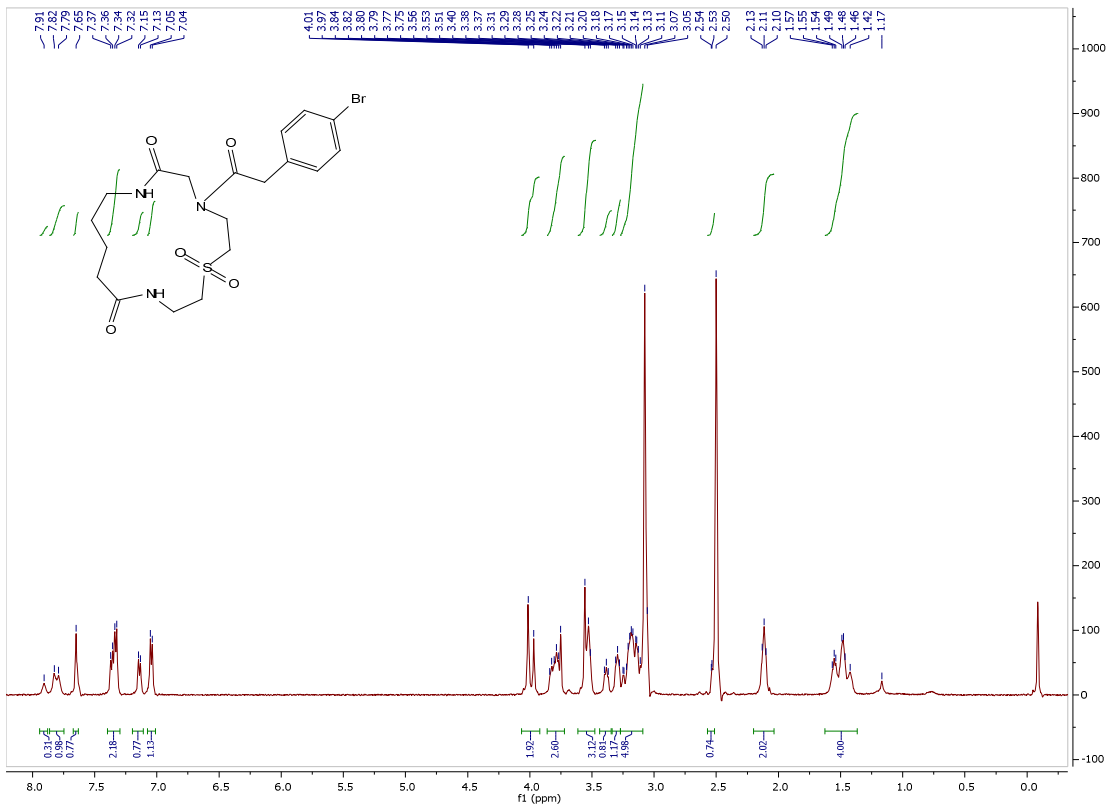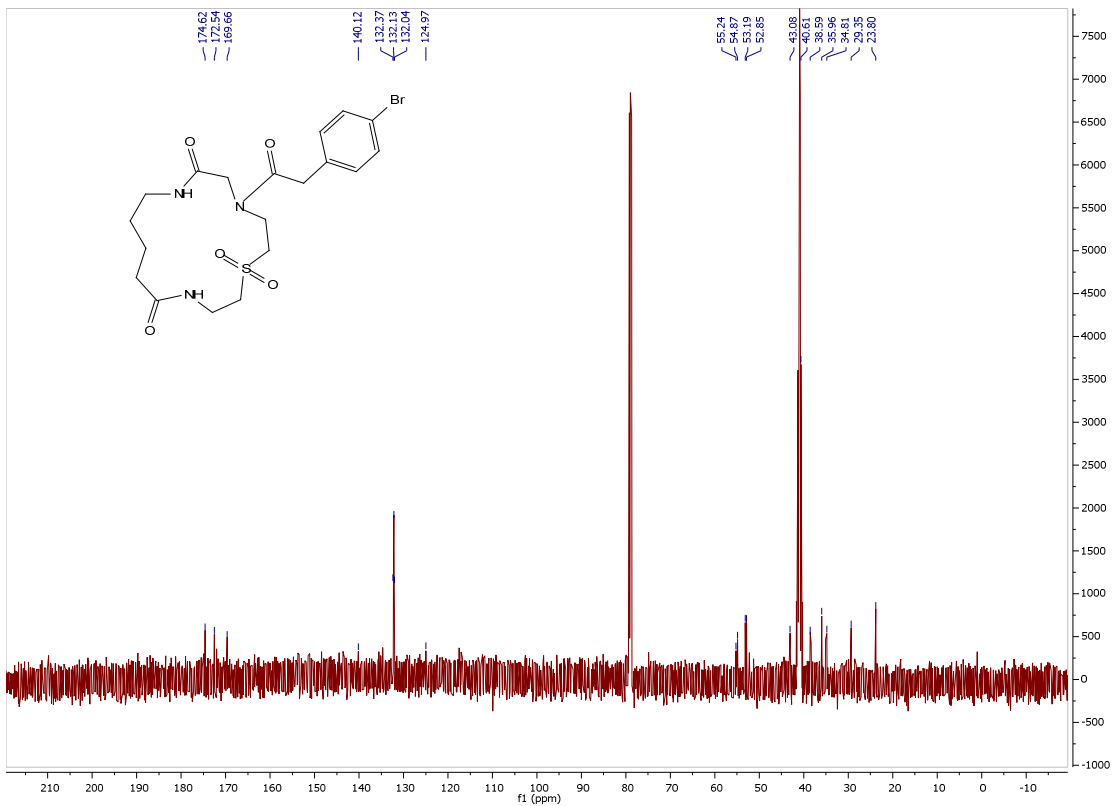

17mdv246-676-c-f22 #28 RT: 0.12 AV: 1 NL: 7.80E6  
T: FTMS + p ESI Full ms [150.0000-1250.0000]

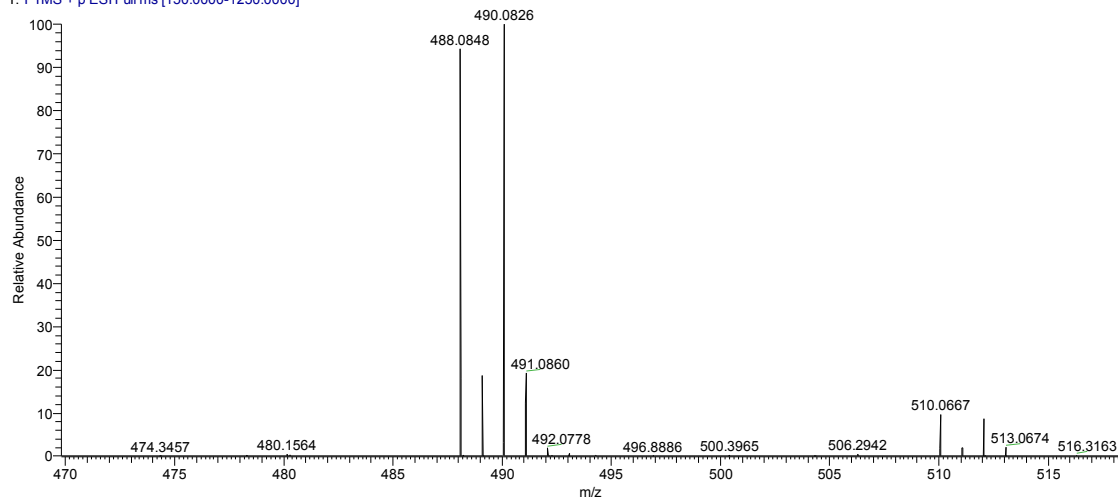

### Crystal structure determination

X-ray diffraction data for single crystal of compounds **6c**, **6e** and **6l** were collected using SuperNova (Rigaku - Oxford Diffraction) four circle diffractometer with a mirror monochromator and a microfocus MoK $\alpha$  radiation source ( $\lambda = 0.71073$  Å) for **6c** and **6e** and Cu MoK $\alpha$  radiation source ( $\lambda = 1.5418$  Å) for **6l**. Additionally, the diffractometer was equipped with a CryoJet HT cryostat system (Oxford Instruments) allowing low temperature experiments, performed at 130 (2) K and 129.95(10) K for **6l**. The obtained data was processed with CrysAlisPro software [S1]. The phase problem was solved by direct methods using SIR2004 [S2] or SUPERFLIP [S3]. Parameters of models were refined by full-matrix least-squares on  $F^2$  using SHELXL-2014/6 [S4]. Calculations were performed using WinGX integrated system (ver. 2014.1) [S5]. Figure was prepared with Mercury 3.7 software [S6].

All non-hydrogen atoms were refined anisotropically. All hydrogen atoms attached to carbon atoms were positioned with the idealised geometry and refined using the riding model with the isotropic displacement parameter  $U_{iso}[H] = 1.2$  (or 1.5 (methyl groups only))  $U_{eq}[C]$ . Crystal data and structures refinement results for presented crystal structure are shown in Table S1. The molecular geometry (asymmetric unit) observed in the crystal structures are shown in Figure S1.

Crystals of compound **6c** were poor quality. Among all tested crystals only one dataset allowed obtaining model of the structure. The refinement was complicated and resulted with poor refinement model. Obtained data indicated multi-component twinning. The twinning matrix was defined with TwinRotMat application of PLATON program [S7]. The obtained model confirmed the molecular structure, however with high refinement parameters R1 and wR2.

In the crystal structure of compound **6l**, a conformational disorder is observed for the solvent molecule present in an asymmetric unit. The two alternative conformations were modelled for O26 with 73% and 27% refined occupancies for components A and B, respectively.

Crystallographic data have been deposited with the Cambridge Crystallographic Data Centre as supplementary publication no.: **6c** (CCDC 1577989), **6e** (CCDC 1577990) and **6l** (CCDC 1577248). Copies of the data can be obtained, free of charge, on application to CCDC, 12 Union Road, Cambridge CB2 1EZ, UK, (fax: +44-(0)1223-336033 or e-mail: deposit@ccdc.cam.ac.uk).



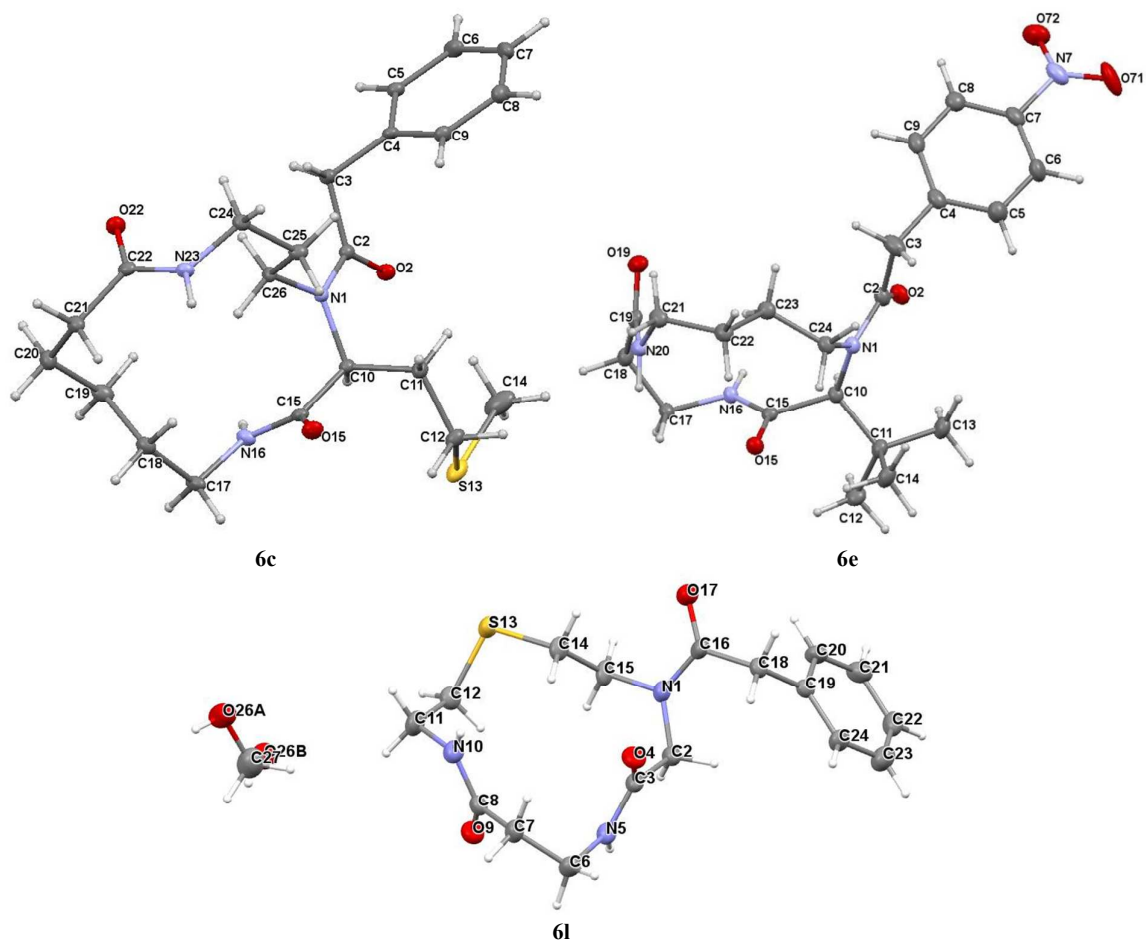

Figure S1. Molecular geometry observed in the crystal structures of compounds **6c**, **6e** and **6l**, showing the atom labelling scheme. This compound **6l** crystallise as a solvate in the ratio 1:1 (compound **6l**:methanol). The positional disorder on O26 in methanol molecule were observed and refined with site occupancy 73% and 27% for alternative conformers A and B, respectively. Displacement ellipsoids of non-hydrogen atoms are drawn at the 30% probability level. H atoms are presented as small spheres with an arbitrary radius

Table S1. Crystal data and structure refinement results for compound **6c**, **6e** and **6l**.

|                                                                | <b>6c</b>                                                                                                                    | <b>6e</b>                                                                                                         | <b>6l</b>                                                                                                          |
|----------------------------------------------------------------|------------------------------------------------------------------------------------------------------------------------------|-------------------------------------------------------------------------------------------------------------------|--------------------------------------------------------------------------------------------------------------------|
| Empirical moiety formula                                       | C <sub>22</sub> H <sub>33</sub> N <sub>3</sub> O <sub>3</sub> S                                                              | C <sub>21</sub> H <sub>30</sub> N <sub>4</sub> O <sub>5</sub>                                                     | C <sub>17</sub> H <sub>23</sub> N <sub>3</sub> O <sub>3</sub> S, C H <sub>4</sub> O                                |
| Formula weight [g/mol]                                         | 419.57                                                                                                                       | 418.49                                                                                                            | 381.49                                                                                                             |
| Crystal system                                                 | Triclinic                                                                                                                    | Monoclinic                                                                                                        | Monoclinic                                                                                                         |
| Space group                                                    | P $\bar{1}$                                                                                                                  | P2 <sub>1</sub> /c                                                                                                | P2 <sub>1</sub>                                                                                                    |
| Unit cell dimensions                                           | a = 10.2751(6)Å<br>b = 10.9293(5)Å<br>c = 11.4868(5)Å<br>$\alpha$ =63.848(4)°<br>$\beta$ =75.238(5)°<br>$\gamma$ =85.703(4)° | a = 14.3770(4)Å<br>b = 16.1729(4)Å<br>c = 9.3750(2)Å<br>$\alpha$ =90.0°<br>$\beta$ =91.987(3)°<br>$\gamma$ =90.0° | a = 4.8449(3)Å<br>b = 23.9147(13)Å<br>c = 8.5862(6)Å<br>$\alpha$ =90.0°<br>$\beta$ =105.370(7)°<br>$\gamma$ =90.0° |
| Volume [Å <sup>3</sup> ]                                       | 1118.65(11)                                                                                                                  | 2178.54(9)                                                                                                        | 959.25(11)                                                                                                         |
| Z                                                              | 2                                                                                                                            | 4                                                                                                                 | 2                                                                                                                  |
| D <sub>calc</sub> [Mg/m <sup>3</sup> ]                         | 1.246                                                                                                                        | 1.276                                                                                                             | 1.317                                                                                                              |
| $\mu$ [mm <sup>-1</sup> ]                                      | 0.172                                                                                                                        | 0.092                                                                                                             | 1.739                                                                                                              |
| F(000)                                                         | 452                                                                                                                          | 406                                                                                                               | 406                                                                                                                |
| Crystal size [mm <sup>3</sup> ]                                | 0.3 x 0.2 x 0.1                                                                                                              | 0.2 x 0.2 x 0.05                                                                                                  | 0.3 x 0.3 x 0.2                                                                                                    |
| $\Theta$ range                                                 | 3.23° to 28.67°                                                                                                              | 2.92° to 28.43°                                                                                                   | 3.7° to 76.76°                                                                                                     |
| Index ranges                                                   | -12 ≤ h ≤ 13,<br>-14 ≤ k ≤ 14,<br>-15 ≤ l ≤ 15                                                                               | -10 ≤ h ≤ 18,<br>-21 ≤ k ≤ 12,<br>-12 ≤ l ≤ 11                                                                    | -6 ≤ h ≤ 5,<br>-26 ≤ k ≤ 29,<br>-10 ≤ l ≤ 10                                                                       |
| Refl. collected                                                | 15096                                                                                                                        | 10130                                                                                                             | 3718                                                                                                               |
| Independent reflections                                        | 5163<br>[R(int) = 0.0315]                                                                                                    | 4854<br>[R(int) = 0.0383]                                                                                         | 2535<br>[R(int) = 0.0575]                                                                                          |
| Completeness [%] to $\Theta$                                   | 99.9 ( $\Theta$ 25.2°)                                                                                                       | 99.8 ( $\Theta$ 25.2°)                                                                                            | 99.8 ( $\Theta$ 76.7°)                                                                                             |
| Absorption correction                                          | Multi-scan                                                                                                                   | Multi-scan                                                                                                        | Multi-scan                                                                                                         |
| Tmin. and Tmax.                                                | 0.898 and 1.000                                                                                                              | 0.632 and 1.000                                                                                                   | 0.461 and 1.000                                                                                                    |
| Data/restraints/parameters                                     | 5163 / 3 / 273                                                                                                               | 4854 / 0 / 282                                                                                                    | 2535 / 1 / 243                                                                                                     |
| GooF on F2                                                     | 1.098                                                                                                                        | 0.915                                                                                                             | 1.043                                                                                                              |
| Final R indices [I>2sigma(I)]                                  | R1= 0.1178,<br>wR2= 0.3688                                                                                                   | R1= 0.0526,<br>wR2= 0.1277                                                                                        | R1= 0.0598,<br>wR2= 0.1480                                                                                         |
| R indices (all data)                                           | R1= 0.1241,<br>wR2= 0.3714                                                                                                   | R1= 0.0833,<br>wR2= 0.1515                                                                                        | R1= 0.0717,<br>wR2= 0.1629                                                                                         |
| $\Delta\rho_{\max}$ , $\Delta\rho_{\min}$ [e·Å <sup>-3</sup> ] | 1.45 and -0.53                                                                                                               | 0.27 and -0.26                                                                                                    | 0.49 and -0.56                                                                                                     |

**References:**

[S1] Rigaku-Oxford Diffraction; CrysAlisPro Oxford Diffraction Ltd, Abingdon, England V 1. 171. 36. 2. (release 27-06-2012 CN (2006)

[S2] Maria C. Burla, Rocco Caliendo, Mercedes Camalli, Benedetta Carrozzini, Giovanni L. Casciarano, Liberato De Caro, Carmelo Giacovazzo, Giampiero Polidori and Riccardo Spagna J. Appl. Cryst. 2005 Vol. 38, Issue 2, pages 381–388

[S3] Palatinus, L. Chapuis, G., J. Appl. Cryst. 2007, 40, 786.

[S4] Sheldrick, G. M. Acta Cryst. 2008, A64, 112-122.

[S5] Farrugia, L., J. J. Appl. Cryst. 1999, 32, 837-838.

[S6] Macrae C. F., Edgington P.R., McCabe P., Pidcock E., Shields G.P., Taylor R., Towler M., & van de Streek J., J. Appl. Cryst. 2006, 39, 453-457.

[S7] Spek A.L., Acta Cryst. 2009, D65, 148-155.

### Virtual library synthesis

The virtual library of macrocycles was created using ChemAxon's REACTOR software (<http://www.chemaxon.com>). 221 amino isocyanides, 272 oxo compounds and 205 carboxylic acids were used as reactants. Therefore, the theoretical chemical space of this virtual library is  $221 \times 272 \times 205 = 12.322.960$  (stereoisomers not included). To investigate such large chemical space, the program RandReactor was used to provide a smaller random sublibrary (N=1000) as smiles files.<sup>1</sup> The smiles files were then uploaded into StarDrop software for calculating molecular weight, logP, number of H bond donor and acceptor. This data was scored based on Lipinski rule of 5 already implemented in the Scoring Profiles of StarDrop. The data were visualized in scatter and radar plots in which the colors are formatted according to scoring function. Yellow and red color stand for high and low scores, respectively.

- (1) Huang, Y.; Wolf, S.; Bista, M.; Meireles, L.; Camacho, C.; Holak, T. A.; Dömling, A. Chem. Biol. Drug Des. 2010, 76, 116-129.

### List of random 1000 product smiles:

[H]C1(C)N(CCNC(=O)CNC1=O)C(=O)C1=C2C=CC=CC2=CC=CC=C12  
COC1=CC=CC(C2N(CCCCCCNC(=O)CCCNC2=O)C(=O)C(OC)(C2=CC=CC=C2)C(F)(F)F)=C1OC  
[H]C1(N(CC(O)CNC(=O)CC(CC(C)C)NC1=O)C(=O)CC1=CC=C(C)C=C1)C1=CC=C(OC)C=C1  
COC1=CC=C(C=C1)C1CC(=O)NCC(C)(C)CN(C(=O)C(O)=O)C2(CCCC(C)=C2\C=C/S)C(=O)N1  
[H]C1(N(CCCNC(=O)CC(CC(C)C)NC1=O)C(=O)CC1=CC=C(O)C=C1)C1=CC(OC)=CC=C1  
C1C1=CC=CC(CC(=O)N2CCCNC(=O)C(CC3=CNC4=C3C=CC=C4)NC(=O)C2CCCCCCCCC2)=C1  
CC1(CC(=O)OCC2=CC=CC=C2)N(CC(O)CNC(=O)CCCNC1=O)C(=O)CCOCC1=CC=CC=C1  
CC1(N(CCCCCCCCCCNC(=O)CCCCNC1=O)C(=O)CC12CC3CC(CC(C3)C1)C2)C1=C(O)C=CC(Br)=C1  
[H]C1(N(C(C(NC(=O)CCCCNC1=O)C1=CC=CC=C1)C1=CC=CC=C1)C(=O)C1=C2C=CC=CC2=CC=CC=C12)C1=C(Br)C=CC(OC)=C1O  
COC1=CC=C(C=C1)C1CC(=O)NCCOCCOCCN(C(=O)C2=C3C=CC=CC3=CC3=CC=CC=C23)C2(CC(CC=C2C)C(C)=C)C(=O)N1  
CC(C)C1NC(=O)C(N(C(C(NC1=O)C1=CC=CC=C1)C1=CC=CC=C1)C(=O)C1=C2C=CC=CC2=CC=CC=C12)C1=CC=C(F)C=C1  
O=C(N1CCOCCOCCNC(=O)CCCCNC(=O)C11CCOCC1)C1=C2C=CC=CC2=CC2=CC=CC=C12  
O=C(N1CCCCCCCCCCCCCNC(=O)CNC(=O)C11CCC=C1)C1=C2C=CC=CC2=CC2=CC=CC=C12  
CC1(C)CNC(=O)CCCNC(=O)C(C2CC2)N(C1)C(=O)C1=C2C=CC=CC2=CC2=CC=CC=C12  
COC1=CC=C(C=C1)C1CC(=O)NCCCCCN(C(=O)C2=C3C=CC=CC3=CC3=CC=CC=C23)C(C)(C=C)C(=O)N1  
CC1(C)N(CCCCCCCCCCNC(=O)C(CC2=CNC3=C2C=CC=C3)NC1=O)C(=O)C1=C2C=CC=CC2=CC2=CC=CC=C12  
[H]C1(C=C)N(C(C(NC(=O)CCCNC1=O)C1=CC=CC=C1)C1=CC=CC=C1)C(=O)C1=C2C=CC=CC2=CC2=CC=CC=C12  
[H]C1(N([C@@H]2CCCC[C@H]2NC(=O)CC(NC1=O)C1=CC=CC=C1)C(=O)CC1=CC=C(C)C=C1)C1=CC=C(OC)C=C1

CC1=C(\C=C/S)C2(CCC1)N(CCCCCCCCNC(=O)CC(NC2=O)C1=CC=CC=C1)C(=O)C(O)=O  
 COC(=O)CCC1N(CCNC(=O)CCCCNC1=O)C(=O)\C=C\C1=CC(=CC=C1)C(F)(F)F  
 CC1(C)CCCC11N(CCSCCNC(=O)CCNC1=O)C(=O)C1=CN=C2C=C(CI)C=CC2=C1O  
 COC1=CC=CC(OC)=C1C(=O)N1[C@@H]2CCCC[C@H]2NC(=O)CC(CC(C)C)NC(=O)C1C1=C(Br)C=CC=C1  
 [Cl-].CC(C)CC1NC(=O)C(C)(N(CCCCCCCCCCNC1=O)C(=O)CC1=C[NH2+])C=N1)C1=CC=C(Br)S1  
 COC1=CC=C(C=C1)C1CC(=O)NCC(O)CN(C(=O)C2=CC=C(O)C=C2O)C(C)(C2=C(C=O)C=CC=C2)C(=O)N1  
 CC(C)C1NC(=O)C2(CCCC3=C2C=CC=N3)N(CCCCCCCCNC1=O)C(=O)CC12CC3CC(CC(C3)C1)C2  
 [H]C1(N(CCCCCCNC(=O)CC(NC1=O)C1=CC=C(CI)C=C1)C(=O)C1=C2C=CC=CC2=CC2=CC=CC=C12)C1=CC=CC(C  
 l)=C1C1  
 CCC1(N(CCCCCCNC(=O)CC(NC1=O)C1=CC=CC=C1)C(=O)C1=C2C=CC=CC2=CC2=CC=CC=C12)C1=CC=CS1  
 CC(C)CC1NC(=O)C(N(C(C(NC1=O)C1=CC=CC=C1)C1=CC=CC=C1)C(=O)CC1=CC=C(C)C=C1)C1=C(CI)C=CC=C1  
 CCOC(=O)C1CCCC11N(CCCNC(=O)C(CC(C)C)NC1=O)C(=O)C(O)=O  
 ClC1=CC=CC(CC(=O)N2CCCCCNC(=O)CCCCCNC(=O)C2CCCCCCCCC=C)=C1  
 COC1=C(OC)C=C(CC2(C)N(CCSCCNC(=O)CC(NC2=O)C2=CC=C(CI)C=C2)C(=O)CCOCC2=CC=CC=C2)C=C1  
 CC1(C)CNC(=O)C(CC2=CC=CC=C2)NC(=O)C(C)(N(C1)C(=O)CC12CC3CC(CC(C3)C1)C2)C1=C(O)C=CC(Br)=C1  
 [H]C1(N(CC(O)CNC(=O)CC(NC1=O)C1=CC=CC=C1)C(=O)C1=C2C=CC=CC2=CC2=CC=CC=C12)C1=C(Br)C=CC(O  
 C)=C1O  
 COC(C(=O)N1CCNC(=O)CCCNC(=O)C1C1=CC=C(C=C1)C1=CC=CC=C1)(C1=CC=CC=C1)C(F)(F)F  
 CC1(N(CCCCCCNC(=O)CC(NC1=O)C1=CC=C(CI)C=C1)C(=O)C1=CC=CC=C1)C1=C(O)C=CC=C1  
 COC1=CC=CC(\C=C\C(=O)N2CCCCCNC(=O)CC(CC(C)C)NC(=O)C2C2=CC=C(COC(C)=O)O2)=C1  
 [H]C1(N(CCCCCCCCCCCCNC(=O)CCNC1=O)C(=O)C1=CC(OC)=C(OC)C=C1OC)C1=C(OC)C=CC=C1  
 [H]C1(N(CC(O)CNC(=O)CNC1=O)C(=O)CCC(=O)C1=CC=C(F)C=C1)C1=CSC=C1  
 [H]C1(N(CCCCCCCCNC(=O)C(CC2=CNC3=C2C=CC=C3)NC1=O)C(=O)\C=C\C1=CC(=CC=C1)C(F)(F)F)C1=CC(OC)  
 =CC(OC)=C1  
 COC(=O)CCCC1N(CCCCCCNC(=O)CC(NC1=O)C1=CC=CC=C1)C(=O)C1=CN=C2C=C(CI)C=CC2=C1O  
 CC1=CC=C(F)C(C2N(C(C(NC(=O)CC(NC2=O)C2=CC=CC=C2)C2=CC=CC=C2)C2=CC=CC=C2)C(=O)\C=C\C2=CC=C  
 S2)=C1C1  
 COC1=CC=CC(OC)=C1C(=O)N1CC(C)(C)CNC(=O)C(NC(=O)C1(CC1=CC=CC=C1)C1=CC=CC=C1)C(C)C  
 COC1=CC=C(OC)C(=C1)C(=O)N1CCCNC(=O)CCNC(=O)C1(CBr)C1=CC=CC(F)=C1  
 [H]C1(N(C(C(NC(=O)CCCCNC1=O)C1=CC=CC=C1)C1=CC=CC=C1)C(=O)COC1=CC=C(Br)C=C1)C1=CC2=C(OCO  
 2)C=C1  
 CC(C)[C@H](NC(=O)OCC1=CC=CC=C1)C(=O)N1CCCCCCCCCCCNC(=O)CCCNC(=O)C1(CCCCl)C1=CC=CS1  
 CC(C)C1NC(=O)C(N(CCCCNC1=O)C(=O)C1=CC(Br)=CC=C1)C1=CC=CN=C1  
 CC1=C(Br)C=CC=C1C(=O)N1CC(O)CNC(=O)C(CC2=CNC3=C2C=CC=C3)NC(=O)C1C1=CC=NC=C1

CC1=C(SC=C1)C(=O)N1CCCCNC(=O)CNC(=O)C1C1=C(C1)C=CC(F)=C1  
 COC1=CC=C(C=C1)C1CC(=O)NCCCCN(C(=O)CBr)C2(CC3CCC(C2)N3C)C(=O)N1  
 COC1=CC=C(CC(=O)N2CCCCCNC(=O)CC(NC(=O)C2(CCC1)C2=CC=CC=C2)C2=CC=CC=C2)C=C1  
 [H]C1(N(C(C(NC(=O)CC(NC1=O)C1=CC=CC=C1)C1=CC=CC=C1)C1=CC=CC=C1)C(=O)C1=C(S)C=CC=C1)C1=CC=CC(O)=C1O  
 COC1=CC=C(C(=O)N2CC(C)(C)CNC(=O)C(NC(=O)C22CCCC2(C)C)C(C)C)C(OC)=C1  
 FC1=CC(=CC(F)=C1F)C1N(CCCCCCCCCCNC(=O)CNC1=O)C(=O)CC#N  
 [H]C1(\C=C\C2=CC=CC=C2)N(C(C(NC(=O)CC(CC(C)C)NC1=O)C1=CC=CC=C1)C1=CC=CC=C1)C(=O)CCBr  
 [H]C1(N(CCCCCNC(=O)C(CC2=CC=CC=C2)NC1=O)C(=O)CC12CC3CC(CC(C3)C1)C2)C1=CC=CC=C1  
 CC1(C)CNC(=O)C(CC2=CNC3=C2C=CC=C3)NC(=O)C(N(C1)C(=O)C1=C2C=CC=CC2=CC2=CC=CC=C12)C1=CC=C(F)C=C1Cl  
 COC1=CC=C(C=C1)C1CC(=O)NCCCCCCCCCCCCN(C(C2=CC(=CC=C2)C#N)C(=O)N1)C(=O)C1=C2C=CC=CC2=CC2=CC=CC=C12  
 CSCCC1N(CCCCCCNC(=O)C(CC2=CC=CC=C2)NC1=O)C(=O)C1=C2C=CC=CC2=CC2=CC=CC=C12  
 COC(C(=O)N1CCCCCCCCCNC(=O)CCNC(=O)C1C1=CC=C(COC(C)=O)O1)(C1=CC=CC=C1)C(F)(F)F  
 [H]C1(N(CCCCCCCCCCNC(=O)CNC1=O)C(=O)CC1=CC=C(C)C=C1)C1=C(OC)C=CC=C1  
 [H]C1(N(CCCCCCCCCCNC(=O)C(CC(C)C)NC1=O)C(=O)C1=CC=CC=C1)C1=CC=C(OC2=CC=CC=C2)C(OC)=C1  
 OB(O)C1=CC=C(C=C1)C(=O)N1CCCCCCCCCNC(=O)CC(NC(=O)C11C2CC3CC(C2)CC1C3)C1=CC=C(C1)C=C1  
 COC1=CC=CC=C1CC(=O)N1CCCCCCCCCNC(=O)CCCCNC(=O)C1C1=C(C1)C(F)=CC=C1F  
 COC1=CC(=CC(OC)=C1OC)C(=O)N1CCNC(=O)CCNC(=O)C1C1=C(C1)C=CC=C1  
 CCOC(=O)C1CCCC11N(CCCCCCCCCCNC(=O)CCNC1=O)C(=O)C1=CC=C(OC)C=C1OC  
 CC(C)CC1NC(=O)C(C)(C)C)N(CCCCCCCCCCNC1=O)C(=O)C#C  
 COC1=CC=C(C=C1)C1CC(=O)NCC(O)CN(C(=O)C2CCC=CC2)C(C)(C2=CC=C(C1)C=C2)C(=O)N1  
 CC(C)C1NC(=O)C(N(CCCCCCCCCCNC1=O)C(=O)CC1=CC(C1)=CC=C1)C1=CC=C(OC(F)(F)F)C=C1  
 [H]C1(N([C@@H]2CCCC[C@H]2NC(=O)CNC1=O)C(=O)CCO)C1=CC=CC(OC)=C1O  
 COC1=C(OC)C=C(C=C1)C1(C)N(CCCCCCNC(=O)CC(CC(C)C)NC1=O)C(=O)CC1=CC=C(C)C=C1  
 [H]C1(C(O)CO)N(CCNC(=O)CC(CC(C)C)NC1=O)C(=O)[C@@H](NC(=O)OC(C)(C)C)[C@@H](C)CC  
 CCCCCCCCCCCCCCCCCC(=O)N1CCCCCCCCCNC(=O)CC(NC(=O)C1C(C)C)C1=CC=C(C1)C=C1  
 CCC1(N(CCCCCCNC(=O)CC(CC(C)C)NC1=O)C(=O)C1=CC(OC)=C(OC)C=C1OC)C1=CC=C(F)C=C1  
 COC1=C(OC2=CC=CC=C2)C=CC(=C1)C1N(CCCNC(=O)C(CC2=CC=CC=C2)NC1=O)C(=O)[C@H](C)NC(=O)OC(C)(C)C  
 [H][C@@]12CC[C@H]([C@H](C)CCC(=O)N3CCCCCCCCCCCCCNC(=O)C(CC4=CNC5=C4C=CC=C5)NC(=O)C3C3=C(C1)C=CC=C3F)[C@@]1(C)CC[C@@]1([H])[C@@]2([H])CC[C@]2([H])C[C@H](O)CC[C@]12C  
 OC(C(=O)N1C(C(NC(=O)CCCNC(=O)C1C1=CC(Br)=CC=C1)C1=CC=CC=C1)C1=CC=CC=C1)C1=CC=CC=C1

[H]C1(N(CCCCCNC(=O)CC(CC(C)C)NC1=O)C(=O)CC1CCC=C1)C1=C(Br)C=CC(OC)=C1O

COC1=CC=C(\C=C\C(=O)N2[C@@H]3CCCC[C@H]3NC(=O)C(CC3=CC=CC=C3)NC(=O)C2C2=C(C=CC=C2)[N+](=[O-])=O)C=C1

CC[O]=C1NC(CC(C)C)C(=O)NCC(O)CN(C1C1=CNC2=C1C=CC(C1)=C2)C(=O)\C=C\C(O)=O

[H]C1(C(O)CO)N(CCCCCCCCCNC(=O)CC(CC(C)C)NC1=O)C(=O)C1=CC=CC=C1I

COC(C(=O)N1CCCCCCCCNC(=O)CNC(=O)C1(C)C=O)(C1=CC=CC=C1)C(F)(F)F

CCCC1(CCC)N(CCNC(=O)C(CC2=CC=CC=C2)NC1=O)C(=O)C1=CC(O)=C2C=CC=CC2=C1O

COC1=CC=CC=C1CC1(\C=C\C2=CC=CC=C2)N([C@@H]2CCCC[C@H]2NC(=O)CCCNC1=O)C(=O)C1=C(S)C=CC=C1

C[C@H](NC(=O)OC(C)(C)C)C(=O)N1CCSCCNC(=O)C(CC2=CNC3=C2C=CC=C3)NC(=O)C1C1=C(F)C=C(F)C=C1

CCCC(=O)N1[C@@H]2CCCC[C@H]2NC(=O)CC(NC(=O)C11CCOC2=CC=CC=C12)C1=CC=C(C1)C=C1

[H]C1(\C=C\C2=CC=CC=C2)N(C(C(NC(=O)CC(NC1=O)C1=CC=C(OC)C=C1)C1=CC=CC=C1)C1=CC=CC=C1)C(=O)\C=C\C1=C(OC)C=CC=C1

C1C1=CC=CC(C1)=C1C(=O)N1CCCCCCCCNC(=O)CC(NC(=O)C1C1=CNC2=C1C=CC=C2)C1=CC=CC=C1

CC(C)CC1NC(=O)C(CC2=CC=CC=C2)N(CCSCCNC1=O)C(=O)CC1CCCCC1

CC(C)=CC1(C)N(C(C(NC(=O)CNC1=O)C1=CC=CC=C1)C1=CC=CC=C1)C(=O)[C@H](COCC1=CC=CC=C1)NC(=O)OC(C)(C)C

\C=C(/C)C1N(CC(O)CNC(=O)C(CC2=CC=CC=C2)NC1=[O])C1=CC=C(C=C1)C(O)=O)C(C)=O

[H]C1(N(CC(O)CNC(=O)C(NC1=O)C(C)C)C(=O)C1=C(O)C=CC=C1OC)C1=CC=C(Br)C=C1

CC(C)(C)OC(=O)NCC(=O)N1CCOCCOCCNC(=O)CC(NC(=O)C1C1=CC=C2NN=CC2=C1)C1=CC=C(C1)C=C1

CCC\C=C\C(=O)N1CCSCCNC(=O)CCNC(=O)C1CC1=CC=CC=C1

CC(C)=CC1(C)N(CCCCNC(=O)C(CC2=CC=CC=C2)NC1=O)C(=O)[C@H](CC1=CC=CC=C1)NC(=O)OC(C)(C)C

O=C(N1CCNC(=O)CNC(=O)C11CCN(CC2=CC=CC=C2)CC1)C1=CC2=C(O1)C=CC=C2

COC1=CC(OC)=C(C=C1)C1N([C@@H]2CCCC[C@H]2NC(=O)CC(NC1=O)C1=CC=CC=C1)C(=O)C(C)C1

COC1=CC2=C(OCC(C)C22N(CCCCCCCCCNC(=O)CC(NC2=[O])C2=CC=C(C=C2)C(O)=O)C2=CC=CC=C2)C(C)=O)C=C1

COC(=O)C1=C(C2N(CCCCCNC(=O)CCNC2=O)C(=O)[C@H](COCC2=CC=CC=C2)NC(=O)OC(C)(C)C)C(OC)=CC(OC)=C1

CCOC(=O)C1CCCC11N(CCCCNC(=O)CCNC1=O)C(=O)C1=CC2=C(C=C1)C=C(O)C=C2

CC1(CCCCC1)C(=O)N1CC(C)(C)CNC(=O)CCCCNC(=O)C1(CCCC1)C1=CC=CC=C1

COC(=O)CCCC1(C)N(CCNC(=O)C(CC2=CNC3=C2C=CC=C3)NC1=O)C(=O)C1=CC=C(C)S1

[H]C1(N(C(C(NC(=O)C(CC2=CC=CC=C2)NC1=O)C1=CC=CC=C1)C1=CC=CC=C1)C(=O)C1=CC=C(C)C=C1)C1=CC=CC(O)=C1O

CC1(C)CCCC11N([C@@H]2CCCC[C@H]2NC(=O)CCCCNC1=O)C(=O)C1CCC=CC1

CC(C)CC1N(CCCCCCCCCNC(=O)C(CC2=CNC3=C2C=CC=C3)NC1=O)C(=O)CNC(=O)OCC1=CC=CC=C1

COC(=O)C1CCCC11N(CCCCNC(=O)C(CC2=CNC3=C2C=CC=C3)NC1=O)C(=O)CC1=CC=C(O)C=C1  
 CC1(N(CCCCNC(=O)C(CC2=CNC3=C2C=CC=C3)NC1=O)C(=O)C#C)C1=C(C=O)C=CC=C1  
 [H]C1(CC)N(CCCCCCCCNC(=O)CCNC1=O)C(=O)C1=C(O)C=CC(O)=C1  
 [H]C1(C=C)N(CCCCCCCCNC(=O)C(NC1=O)C(C)C)C(=O)C1=CC=C(C=C1)B(O)O  
 CC(C)[C@H](NC(=O)OC(C)(C)C)C(=O)N1CCCCCCCNC(=O)CCCCNC(=O)C1C1=CC(CI)=C(CI)C=C1  
 [H]C1(N(CCCCCCCCNC(=O)CC(NC1=O)C1=CC=C(OC)C=C1)C(=O)CCCCCCCCCCCCCCCC)C1=CC=C(OC)C(OC)=C1C1  
 COC1=CC=C(C=C1)C1CC(=O)NCCCN(C(C2=CC=CN=C2)C(=O)N1)C(=O)C1=C(C)C=C(C)C=C1  
 FC1=CC(C2N(CCCCCCCCNC(=O)CC(NC2=O)C2=CC=CC=C2)C(=O)CCI)=C(CI)C=C1  
 COC1=CC=CC2=C1C1(CC2)N(CCOCCOCCNC(=O)CC(CC(C)C)NC1=O)C(=O)CC1=CC=C(C)C=C1  
 OC(=O)C(=O)N1[C@@H]2CCCC[C@H]2NC(=O)CC(NC(=O)C1(CCCCI)C1=CC=CS1)C1=CC=C(CI)C=C1  
 CCOC(=O)CC1(C)N(CCCCCCCCNC(=O)CCNC1=O)C(=O)C1=CC(OC)=CC=C1OC  
 CCOC(=O)CC1(CCI)N(CCCCCCCCCCNC(=O)CCCCNC1=O)C(=O)C1=CNC2=C1C=CC=C2  
 CC(C)CC1CC(=O)NCCOCCOCCN(C(C2=CC(OCC3=CC=CC=C3)=CC=C2)C(=O)N1)C(=O)CCC1=CC=CC=C1  
 CCC(C)C(=O)N1CCCCCCCNC(=O)CCCCNC(=O)C1C1=C(F)C=C(F)C=C1  
 COC(=O)CCC1N(CCCCCCCCNC(=O)CNC1=O)C(=O)CCC1=CC=CC(OC(=O)C2=CC=CC=C2)=C1  
 COC1=CC2=C(C=C1)C1(CC2)N(CC(O)CNC(=O)CCCCNC1=O)C(=O)CNC(=O)OCC1=CC=CC=C1  
 OC1=CC=C(CC(=O)N2CCSCCNC(=O)CCCCNC(=O)C2C2=C(C=CC(CI)=C2)[N+][([O-])=O)C=C1  
 CIC1=CC=CC(CC(=O)N2CCCCCCCNC(=O)CCCCNC(=O)C2(CC2=CC=CC=C2)CC2=CC=CC=C2)=C1  
 COC1=CC=C(C=C1)C1CC(=O)NCCCCCCCCN(C(C2=CC(=C(Br)C=C2)[N+][([O-])=O)C(=O)N1)C(=O)CCOCC1=CC=CC=C1  
 COC(C(=O)N1C(C(NC(=O)CNC(=O)C1C1=C2C=CC=CC2=CC=C1)C1=CC=CC=C1)C1=CC=CC=C1)(C1=CC=CC=C1)C(F)(F)F  
 COC(=O)CCCC1N(CCSCCNC(=O)C(CC2=CNC3=C2C=CC=C3)NC1=O)C(=O)CC1=CC=C(C)C=C1  
 CCC(C)C(=O)N1CCCCCCCCCNC(=O)C(CC(C)C)NC(=O)C1C1=C(C=C(OC)C=C1OC)C(=O)OC  
 CC(C)(C)OC(=O)NC1(CC1)C(=O)N1CCCCCCCNC(=O)CCCCNC(=O)C1C1=CC=C(OCC(O)=O)C=C1  
 CC1=C(Br)C=CC=C1C(=O)N1CCCCCCCCCNC(=O)CNC(=O)C1C1=CSC2=C1C=CC=C2  
 CC\C=C\C(=O)N1CCCCCNC(=O)CCNC(=O)C1C1=CC=CC2=C1C=CN2  
 [H]C1(N([C@@H]2CCCC[C@H]2NC(=O)CC(NC1=O)C1=CC=CC=C1)C(=O)CCC=C)C1=C(Br)C=CC(OC)=C1O  
 COC1=CC=CC(\C=C\C(=O)N2CCCCCCCCCNC(=O)CC(NC(=O)C22CCC(CC3=CC=CC=C3)C3=CC=CC=C23)C2=CC=C(C=C2)=C1OC  
 COC1=CC=CC=C1CC1(\C=C\C2=CC=CC=C2)N(CCCCNC(=O)C(CC(C)C)NC1=O)C(=O)CC1=CNC2=C1C=CC=C2  
 OC1=C(C=CC=C1)C(=O)N1CCCCCNC(=O)CNC(=O)C1C1=CC(Br)=CC=C1  
 [H]C1(N(CCCCCCCCNC(=O)CCCCNC1=O)C(=O)CCCC)C1=CC=CC=C1

FC1=CC=C(C2N(CCNC(=O)CCNC2=O)C(=O)C(Br)CBr)C(Cl)=C1  
COC1=CC=CC(O)=C1C(=O)N1CCCCNC(=O)C(CC2=CC=CC=C2)NC(=O)C11CCCC(C)=C1  
CN1C2CCC1CC1(C2)N(CC(O)CNC(=O)C(CC2=CNC3=C2C=CC=C3)NC1=O)C(=O)C1(CC1)NC(=O)OC(C)(C)C  
COC1=CC=C(C=C1)C1CC(=O)NCC(C)(C)CN(C(=O)C2=CC3=C(S2)C=CC=C3)C(C2CC2)(C2=CC=CC=C2)C(=O)N1  
CC(C)CC1CC(=O)NCCCN(C(C2=C(C)C=CC=C2)C(=O)N1)C(=O)C=C  
COC1=CC=CC(OC)=C1C(=O)N1CCCNC(=O)C(CC2=CNC3=C2C=CC=C3)NC(=O)C11CCCCC1  
[Cl-].OC1CNC(=O)CCCNC(=O)C(N(C1)C(=O)CC1=C[NH2+]C=N1)C1=CC=C2C=CC=CC2=C1  
OC1=CC=C(C(=O)N2CCCCCCCCCCCCNC(=O)CCCCCNC(=O)C2C2=CC(=CC=C2)C#N)C(O)=C1  
FC(F)(F)C1(N(C(C(NC(=O)CCCCNC1=O)C1=CC=CC=C1)C1=CC=CC=C1)C(=O)CC1=CC=C(Cl)C=C1)C(F)(F)F  
CC(C)CC1CC(=O)NC(C(N(C(=O)C2=CC=C(C)C=C2)C2(CCC=C2)C(=O)N1)C1=CC=CC=C1)C1=CC=CC=C1  
CCCN(CC)C1CCC2(CC1)N(CCCNC(=O)CCCCNC2=O)C(=O)C(OC)(C1=CC=CC=C1)C(F)(F)F  
CC1=C(SC=C1)C1N([C@@H]2CCCC[C@H]2NC(=O)C(CC2=CNC3=C2C=CC=C3)NC1=O)C(=O)C1=C(C)C2=C(O1)C=CC=C2  
COC1=CC2=CC=C(C=C2C=C1)C(=O)N1CCCCCNC(=O)CC(NC(=O)C1CC1=CC=CC=C1)C1=CC=C(Cl)C=C1  
CN1C2CCC1CC1(C2)C(=O)NCCCCC(=O)NCCCN1C(=O)C1=CC(Br)=CC=C1  
CC1=C(Br)C=CC=C1C(=O)N1[C@@H]2CCCC[C@H]2NC(=O)C(CC2=CNC3=C2C=CC=C3)NC(=O)C1C1=CC(F)=CC=C1  
COC(=O)CCC1N(CC(O)CNC(=O)C(CC2=CNC3=C2C=CC=C3)NC1=O)C(=O)C(C)OC(=O)NC1=CC=CC=C1  
COC1=CC=CC=C1C1(C)N(CCCCCCNC(=O)C(CC2=CC=CC=C2)NC1=O)C(=O)CC1CC2CCC1C2  
CC(C)C1NC(=O)C(N(C(C(NC1=O)C1=CC=CC=C1)C1=CC=CC=C1)C(=O)C(CO)C1=CC=CC=C1)C1=C(Br)C=CC=C1  
CC[O]=C1NCCCCC(=O)NCCOCCOCCN(C1CCCCC(=O)OC)C(=O)C=C\C(O)=O  
CC(C)CC1NC(=O)C(N([C@@H]2CCCC[C@H]2NC1=O)C(=O)C1CCCCC1)C1=C(C=CC(Cl)=C1)[N+][[O-]]=O  
COC1=CC=C(C=C1)C1CC(=O)NCCCCCN(C(C2=CC=CN=C2)C(=O)N1)C(=O)[C@H](C)Cl  
COC1=CC=CC(\C=C\C(=O)N2[C@@H]3CCCC[C@H]3NC(=O)CCCCCNC(=O)C2C2=CC=NC=C2)=C1OC  
OCC1=C(CC(=O)N2CCCCCNC(=O)CCCNC(=O)C2C2=C(Cl)C=CC(F)=C2)C=C2OCOC2=C1  
COC1=CC=CC(O)=C1C(=O)N1C(C(NC(=O)CCCCCNC(=O)C1C1=C(Cl)C=CC=C1F)C1=CC=CC=C1)C1=CC=CC=C1  
CC(C)[C@@H](NC(=O)OC(C)(C)C(=O)N1CC(O)CNC(=O)CC(NC(=O)C1C1=CC=CC=C1[N+][[O-]])=O)C1=CC=C(Cl)C=C1  
[H]C1(N(CC(C)C)C)CNC(=O)CC(NC1=O)C1=CC=C(Cl)C=C1)C(=O)CCCNC(=O)OCC1=CC=CC=C1)C1=CC=C(OC)C(O)C=C1  
BrC1=CC=C(S1)C1N(CCCCCCNC(=O)C(CC2=CNC3=C2C=CC=C3)NC1=O)C(=O)CCCC1=CC=CC=C1  
OC1=CC=CC(O)=C1C(=O)N1CCOCCOCCNC(=O)C(CC2=CC=CC=C2)NC(=O)C1(C1=CC=CC=C1)C1=CC=CC=C1  
[O-][N+](=O)C1=C(C=CC(Br)=C1)C1N(CCN(C(=O)CCCCCNC1=O)C(=O)CCCNC(=O)OCC1=CC=CC=C1



[H]C1(N(C(C(NC(=O)C(CC2=CC=CC=C2)NC1=O)C1=CC=CC=C1)C1=CC=CC=C1)C(=O)C1=CC(O)=C2C=CC=CC=C1O)C1=CSC=C1

COC1=CC=C(\C=C\C(=O)N2CCCCCNC(=O)CNC(=O)C2C2=CC=CC(=C2)B2OC(C)(C)C(C)O2)C=C1

COC1=CC=C(\C=C\C(=O)N2CCCCCNC(=O)C(NC(=O)C22CCCC(C)=C2C=C/S)C(C)C)C=C1

IC1=CC=CC=C1C(=O)N1CCCCCNC(=O)C(CC2=CC=CC=C2)NC(=O)C11CCCCC1

COC1=CC=CC(\C=C\C(=O)N2CC(C)(C)CNC(=O)C(CC(C)C)NC(=O)C2C2=CC=C3C=CC=CC3=C2)=C1

[H]C1(N(CCCCCCNC(=O)C(CC2=CNC3=C2C=CC=C3)NC1=O)C(=O)C1=CC2=C(C=CC=C2)N1C)C1=CC=CC=C1[N+](O-)=O

CC(C)CC1NC(=O)C(N(CCCCCCNC1=O)C(=O)C#CC1=CC=CC=C1)C1=CC=C(Br)S1

OC1=CC=C(CC(=O)N2CCCCCNC(=O)CCCNC(=O)C2C2=CC=C(OCC3=CC=CC=C3)C=C2)C=C1C1

C[C@@H](OCC1=CC=CC=C1)[C@H](NC(=O)OC(C)(C)C(=O)N1CCCCCNC(=O)CC(NC(=O)C1(C)C1=CC=CC=C1)C1=CC=CC=C1

COC1=CC=C(C=C1)C1CC(=O)NCCCCN(C(C2=CC(OC3=CC=CC=C3)=CC=C2)C(=O)N1)C(=O)C1=CC2=C(C=C1)C=C(O)C=C2

[H]C1(N(CCCCCCNC(=O)CCCCCNC1=O)C(=O)C1(C)CCCCC1)C1=C(Br)C=CC(OC)=C1

COC1=CC=CC=C1CC1(\C=C\C2=CC=CC=C2)N(CCCCCCCCCCNC(=O)CC(NC1=O)C1=CC=CC=C1)C(=O)C1=C(C)C=C1

CC(=O)N1CCCCCNC(=O)CC(NC(=O)CCC(O)=O)C1(C)C1=CC(=CC(=C1)C(F)(F)F)C(F)(F)F)C1=CC=C(Cl)C=C1

[H]C1(N(CC(C)(C)CNC(=O)CC(NC1=O)C1=CC=CC=C1)C(=O)C1=CC=C(F)C(=C1)[N+](O-)=O)C1=CC=CC=C1[N+](O-)=O

CC1=CC(C)=C(C=C1)C(=O)N1CCCNC(=O)CCCCNC(=O)C1C1=CNC2=C1C=CC(Cl)=C2

CC1(C)CNC(=O)C(CC2=CNC3=C2C=CC=C3)NC(=O)C2(CCN(CCC3=CC=CC=C3)CC2)N(C1)C(=O)\C=C\C1=CC(=CC=C1)C(F)(F)F

[H]C1(N(C(C(NC(=O)CCCNC1=O)C1=CC=CC=C1)C1=CC=CC=C1)C(=O)C1=CN=C2C=C(Cl)C=CC2=C1O)C1=CC=C(C(OC)=C1O

COC1=C(OC)C=C(C=C1)C1(C)N(CCCCCCCCCCNC(=O)CC(CC(C)C)NC1=O)C(=O)\C=C\C1=CC=CS1

CCOC(=O)CC1(CC(=O)OCC)N(CCNC(=O)CNC1=O)C(=O)C1=C(OC)C=CC=C1OC

COC1=CC=CC=C1C1(C)N(CCOCCOCCNC(=O)CCCCCNC1=O)C(=O)C1=CC=C(O)C=C1O

CC1=CC=C(C=C1)C(=O)N1CCCCCCCCCNC(=O)C(CC2=CC=CC=C2)NC(=O)C1(C1CC1)C1=CC=CC=C1

CC(C)C1NC(=O)C(N(CCCCCCCCCCNC1=O)C(=O)C1CCC=CC1)C1=C(C)C=CC=C1

CCCC1(CCC)N(CCCCNC(=O)CCCNC1=O)C(=O)C1=CC2=C(N1)C=CC(O)=C2

CC1=C(\C=C/S)C2(CCC1)N(C(C(NC(=O)C(CC1=CNC3=C1C=CC=C3)NC2=O)C1=CC=CC=C1)C1=CC=CC=C1)C(=O)C1=C(O)C(=CC(=C1)[N+](O-)=O)[N+](O-)=O

[H]C1(N(C(C(NC(=O)CCCCCNC1=O)C1=CC=CC=C1)C1=CC=CC=C1)C(=O)C1=CC(O)=CC(O)=C1)C1=CC(OC)=CC=C1

OC1CNC(=O)CC(NC(=O)C(COCC2=CC=CC=C2)N(C1)C(=O)C(F)(F)F)C1=CC=C(Cl)C=C1

[H]C1(CCC)N(CCCCCCCCCCNC(=O)C(CC2=CNC3=C2C=CC=C3)NC1=O)C(=O)CC1=CNC2=C1C=C(O)C=C2

CC(C)CC1NC(=O)C2(CCC2)N([C@@H]2CCCC[C@H]2NC1=O)C(=O)CCCC1=CC=CC=C1  
 CC1(C)N(CCSCCNC(=O)CC(NC1=O)C1=CC=CC=C1)C(=O)C(O)=O  
 [H]C1(C=C)N(CCSCCNC(=O)CCCCNC1=O)C(=O)CC1=CC=C(O)C=C1  
 CCC(C)C(=O)N1CC(O)CNC(=O)C(CC2=CC=CC=C2)NC(=O)C1C1=CC=CC2=C1C=CN2  
 COC1=CC=C(C=C1)C1CC(=O)NCCCCCCCCCN(C(CC2=CC=CC=C2)C(=O)N1)C(=O)CCC1=CC=CC(OC(=O)C2=CC=CC=C2)=C1  
 COC1=CC=CC2=C1C1(CC2)N(C(C(NC(=O)C(CC2=CNC3=C2C=CC=C3)NC1=O)C1=CC=CC=C1)C1=CC=CC=C1)C(=O)CNC(=O)OCC1=CC=CC=C1  
 CC1(N(CCCCCCNC(=O)CCNC1=O)C(=O)CCCC#C)C1=CC=CC(F)=C1  
 [H][C@@]12CC[C@H]([C@H](C)CCC(=O)N3CCCCCNC(=O)CCNC(=O)C3C3=CNC4=C3C=C(C1)C=C4)[C@@]1(C)C[C@@]1([H])[C@@]2([H])CC[C@]2([H])C[C@H](O)CC[C@]12C  
 OC(C(=O)N1CCCCCCCCCNC(=O)C(CC2=CC=CC=C2)NC(=O)C1C1=C(Br)C=CC(O)=C1)C1=CC=CC=C1  
 CCCN(CC)C1CCC2(CC1)N(CCCNC(=O)C(C1=CC=CC=C1)NC2=O)C(=O)[C@@H](NC(=O)OC(C)(C)C)[C@@H](C)OCC1=CC=CC=C1  
 COC(=O)CCCC1(C)N(CCCCNC(=O)CCCCNC1=O)C(=O)C(C)C  
 SC1=C(C=CC=C1)C(=O)N1C(C(NC(=O)CCNC(=O)C1C1=CC=CN1)C1=CC=CC=C1)C1=CC=CC=C1  
 [H]C1(N(CCCCCCCCCCNC(=O)CCCCNC1=O)C(=O)C1=CC=C(OC)C=C1OC)C(O)=O  
 CC(CC1=CC=C(C=C1)C(C)(C)C)N1N(CCOCOCNC(=O)C(CC2=CC=CC=C2)NC1=O)C(=O)C1=CC2=C(N1)C=CC=C2  
 CC(=O)N[C@@H](CS)C(=O)N1CCCNC(=O)CCNC(=O)C1(C)C=C  
 COC1=C(C=C)N2CCCCCCCCCCCCCNC(=O)C(CC3=CNC4=C3C=CC=C4)NC(=O)C22CC3CCC2(C(O)=O)C3(C)C=C=CC=C1  
 CCOC(=O)C(C1)C1(C)N([C@@H]2CCCC[C@H]2NC(=O)CCCNC1=O)C(=O)C1=C(C1)C=CC=C1C1  
 CC(C)CC1NC(=O)C(C)(N(CC(C)C)CNC1=O)C(=O)CC1CCCCC1)C1=CC=C(C1)C(C1)=C1C1  
 CC1=CC=C(C=C1)C1N(CCNC(=O)CCCNC1=O)C(=O)CC1=CC=CC=C1  
 CCC(=O)N1CCCCCNC(=O)CCNC(=O)C1C1=C(C=CC(C1)=C1)[N+][[O-]]=O  
 O=C(CC1=CC=C2OCOC2=C1)N1C(C(NC(=O)CNC(=O)C1(CC1=CC=CC=C1)CC1=CC=CC=C1)C1=CC=CC=C1)C1=C=C=CC=C1  
 COC1=CC=C(C=C1)C1CC(=O)NCCCN(C(CCSC)C(=O)N1)C(=O)C1=CC=C(Br)C=C1  
 [H]C1(N(CCCCCCNC(=O)CC(NC1=O)C1=CC=C(OC)C=C1)C(=O)C1=CC2=C(C=CC=C2)N1C)C1=CC=C(OCC2=CC=CC=C2)C(OC)=C1  
 [H]C1(N(CCCCCCNC(=O)CCCCCNC1=O)C(=O)CC1=CC(O)=C(OC)C=C1)C1=CC(=CC=C1)[N+][[O-]]=O  
 CC1(CCI)N(CC(O)CNC(=O)C(CC2=CC=CC=C2)NC1=O)C(=O)[C@H]1O[C@@H](O)[C@H](O)[C@@H](O)[C@@H]1O  
 COC1=CC=C(C=C1)C1CC(=O)NCCCCCCCCCN(C(C(C)C)C(=O)N1)C(=O)C1=CC=C(C=C1)N(C)C  
 CCC1(N(C(C(NC(=O)C(CC2=CNC3=C2C=CC=C3)NC1=O)C1=CC=CC=C1)C1=CC=CC=C1)C(=O)C1=CC=CC(=C1C)[N+][[O-]]=O)C1=CC=C(F)C=C1

CC1(C)C2CCC1(C(O)=O)C1(C2)N(C(C(NC(=O)CCCCNC1=O)C1=CC=CC=C1)C1=CC=CC=C1)C(=O)CCC(=O)C1=C=C(F)C=C1  
C\C=C(/C)C1N(CC(C)(C)CNC(=O)CCCCNC1=O)C(=O)[C@H](C)NC(=O)OC(C)(C)C  
CC1=CC(=CC=C1Br)C(=O)N1CCOCCOCCNC(=O)CCNC(=O)C1(C)C1=CC=C(C1)C=C1  
CC(=O)N1CCCCCCCCCCCCNC(=O)CCCCNC(=O)C2CCC(CC2)C(O)=O)C1CC1  
COC1=C(C(=O)N2CC(O)CNC(=O)CCNC(=O)C22CCOC3=CC=CC=C23)C(=CC=C1)[N+]([O-])=O  
COC1=CC=C(\C=C\C(=O)N2CC(O)CNC(=O)CCCNC(=O)C2C2=CC=C(C=C2)C(F)(F)F)C=C1  
COC1=CC=C(\C=C\C(=O)N2CCCCCNC(=O)CC(CC(C)C)NC(=O)C22CCC3=C2C(OC)=CC=C3)C=C1  
CC[O]=C1NC(CC(C)C)C(=O)NCCCCCCCCCCCCN(C(=O)\C=C\C(O)=O)C1(CCCCI)C1=CC=CS1  
COC1=CC=CC(\C=C\C(=O)N2CCSCCNC(=O)CCCNC(=O)C2C2=C3C=CC=CC3=CC=C2)=C1  
CN1C(=CC2=C1C=CC=C2)C(=O)N1CCCCCNC(=O)CCCCCNC(=O)C1C1=CC=C(C=C1)[N+]([O-])=O  
COC1=C(O)C=C(CC(=O)N2CCCCCNC(=O)CNC(=O)C2C2=CC(F)=CC=C2)C=C1  
[H]C(=O)CCCC1([H])N(CC(O)CNC(=O)CCCCNC1=O)C(=O)C1=CC=C2C=CC=CC2=C1  
CCOC(=O)C(CC)C1(C)N(CCSCCNC(=O)CCCCNC1=O)C(=O)C1=CC=CC(O)=C1O  
[H]C1(N(CCCCCCNC(=O)CCCCNC1=O)C(=O)CCCI)C1=CC=C(Br)C=C1  
CCC(C(=O)OC)C1(C)N(CCCCCCNC(=O)CC(NC1=O)C1=CC=C(OC)C=C1)C(=O)CC1=CC=C(C1)C=C1  
CC(C)CC1NC(=O)C(C)N(CCCCCCNC1=O)C(=O)CCO)C1=CC(=CC(=C1)C(F)(F)F)C(F)(F)F  
CC1(N(CCCNC(=O)C(CC2=CC=CC=C2)NC1=O)C(=O)C(O)=O)C1=CC(=CC(=C1)C(F)(F)F)C(F)(F)F  
[H]C1(N(CCCCNC(=O)CCCCNC1=O)C(=O)CC1=CC=C(O)C=C1)C1=CC=CC=C1[N+]([O-])=O  
CC(=O)N[C@@H](CS)C(=O)N1CCSCCNC(=O)CCCCCNC(=O)C1C1=CNC2=C1C=CC=C2  
OC(C(=O)N1CCCCCNC(=O)CCCCCNC(=O)C1CC1=CC=CC=C1)C1=CC=CC=C1  
[H]C1(N(CCCCCCNC(=O)CC(NC1=O)C1=CC=C(OC)C=C1)C(=O)CC1=CC=C2C=CC=CC2=C1)C1=CC=CO1  
[H]C1(N(CCNC(=O)C(CC2=CC=CC=C2)NC1=O)C(=O)C1=CC(Br)=CC=C1O)C(O)=O  
COC1=CC=C(C=C1)C1CC(=O)NCCOCCOCCN(C(C2=CC(C)=CC=C2)C(=O)N1)C(=O)C1=C(O)C=CC=C1  
CCCCC(=O)N1CCCCCCCCCNC(=O)C(NC(=O)C11CCN(CC1)C(=O)OC(C)(C)C(C)C  
[H]C1(C)N(CCCCCCNC(=O)CCCCCNC1=O)C(=O)\C=C\C1=C(OC)C=CC=C1  
CC(C)CC1NC(=O)C(N(CCCCCCNC1=O)C(=O)CC1=CC=CS1)C1=C(C=CC=C1)[N+]([O-])=O  
CC(C)(C)OC(=O)N[C@@H](COCC1=CC=CC=C1)C(=O)N1C(C(NC(=O)C(CC2=CC=CC=C2)NC(=O)C1C1=CC(=CC=C1)C#N)C1=CC=CC=C1)C1=CC=CC=C1  
FC(F)(F)C1(N([C@@H]2CCCC[C@H]2NC(=O)CCCCCNC1=O)C(=O)CBr)C(F)(F)F  
COC1=CC=C(CC(=O)N2CCCCCCCCCNC(=O)C(CC3=CNC4=C3C=CC=C4)NC(=O)C2C2=CC=C(OC(F)(F)F)C=C2)C=C1  
OC(=O)CC1(CC(O)=O)N(CCCCNC(=O)C(CC2=CNC3=C2C=CC=C3)NC1=O)C(=O)C1=C(S)C=CC=C1

[H]C1(N(CCCCCNC(=O)C(CC2=CNC3=C2C=CC=C3)NC1=O)C(=O)C1=CC=C(C)S1)C1=CC=C(C)S1  
COC1=CC=CC=C1C1(C)N(C(C(NC(=O)C(NC1=O)C(C)C)C1=CC=CC=C1)C1=CC=CC=C1)C(=O)C1=CC=CC=C1  
COC1=CC=CC(\C=C\C(=O)N2CCOCCOCCNC(=O)CCCCNC(=O)C22CCCC3=CC(OC)=CC=C23)=C1  
COC(=O)C1CCCCC11N(CCCCCCCCCCCCCNC(=O)CCCCNC1=O)C(=O)C1=CC2=C(C=CC=C2)N1C  
COC(=O)CCC1(C)N(C(C(NC(=O)CCCCNC1=O)C1=CC=CC=C1)C1=CC=CC=C1)C(=O)CC1=CC(O)=C(OC)C=C1  
COC1=CC=C(C=C1)C1CC(=O)NCCCCCN(C(C2=CC=C(F)C=C2)C(=O)N1)C(=O)C(O)C1=CC=CC=C1  
CC(=O)NICCN(C(=O)CCCCNC(=[O]CCC(O)=O)C11CCOCC1  
[O-][N+](=O)C1=CC(=CC=C1F)C(=O)N1CCCCNC(=O)CCCNC(=O)C11CCC=C1  
COC(=O)CCCCC1N([C@@H]2CCCC[C@H]2NC(=O)CNC1=O)C(=O)C1=CC=CC=C1  
COC1=CC=CC(O)=C1C(=O)N1CCSCCNC(=O)CCCCNC(=O)C1C(C)C  
CCC1(N(CCCCCNC(=O)CCCCNC1=O)C(=O)CC1=CC=C(C=C1)[N+](O-)=O)C1=CC=C(F)C=C1  
COC1=CC=C(C=C1)C1CC(=O)NCCCCCCCCN(C(=O)C2=CC=C(F)C=C2)[N+](O-)=O)C2(CC3CCC2(C(O)=O)C3(C)C)C(=O)N1  
CCOC(=O)CC1(CC(=O)OCC)N(CCNC(=O)C(CC2=CC=CC=C2)NC1=O)C(=O)C1=C(C)C=C(C)C=C1  
CCC(C)C(=O)N1CCCCCCCCCCCCNC(=O)CNC(=O)C11CCOCC1  
CC(C)CC1CC(=O)NC(C(N(C(=O)CCC2=CC=CC(OC(=O)C3=CC=CC=C3)=C2)C2(CCC=C2)C(=O)N1)C1=CC=CC=C1)  
C1=CC=CC=C1  
CC[C@H](C)[C@H](NC(=O)OC(C)(C)C)C(=O)N1CC(O)CNC(=O)C(CC2=CNC3=C2C=CC=C3)NC(=O)C1C1=CC=C2N  
N=CC2=C1  
CCC1(CC)N(CCCCCCCCCCCCCNC(=O)CC(NC1=O)C1=CC=C(C)C=C1)C(=O)C1=CN=C2C=CC=CC2=C1  
CC(C)CC1CC(=O)NCCCCN(C(=O)C2=CC=C(C=C2)B(O)O)C(CCI)(C2=CC=CC=C2)C(=O)N1  
CC(C)[C@H](NC(=O)OC(C)(C)C)C(=O)N1CC(O)CNC(=O)CCCNC(=O)C1(CBr)C1=CC=CC=C1  
CCCCCCCCCCCCCCCC(=O)N1CCCCCCCCCCCCNC(=O)CCCCNC(=O)C1(CBr)C1=CC=CC(F)=C1  
[H]C1(N(CCCCCCCCCCCCCNC(=O)C(CC(C)C)NC1=O)C(=O)C1=C(O)C=C(O)C=C1O)C1=CC(O)=CC=C1  
CCCC1(CCC)N(CCCNC(=O)C(NC1=O)C(C)C)C(=O)C1(C)CCCC1  
C1C1=C(C=CC=C1)C(=O)N1CCCCCCCCCCCCNC(=O)CCCNC(=O)C11CCN(CC2=CC=CC=C2)CC1  
[H]C1(CC)N(CCCCCNC(=O)CCCNC1=O)C(=O)C1(CC1)NC(=O)OC(C)(C)C  
OC1CNC(=O)C(CC2=CC=CC=C2)NC(=O)C(CCI)(CCI)N(C1)C(=O)C1=CC2=C(S1)C=CC=C2  
CCOC(=O)CC1(CC(=O)OCC)N(CCCCCNC(=O)CC(NC1=O)C1=CC=CC=C1)C(=O)C1=CC(Br)=CC=C1  
O=C(CCN1C2=C(SC3=C1C=CC=C3)C=CC=C2)N1C(C(NC(=O)CC(NC(=O)C11CCC(C2=CC=CC=C2)C2=C1C=CC=C2)  
C1=CC=CC=C1)C1=CC=CC=C1)C1=CC=CC=C1  
CC(C)C1NC(=O)C(N(CC(C)(C)C)NC1=O)C(=O)C1=C2C=CC=CC2=CC=C1)C1=C(C=CC=C1)B1OC(C)(C)C(C)O1  
CC1=CC=CC=C1C(=O)N1CCCCCCCCCCCCNC(=O)CNC(=O)C11C2CC3CC(C2)CC1C3  
CCOC(=O)C1CCC2(CC1)N(CCSCCNC(=O)CCNC2=O)C(=O)C1=CC=C(C)S1

[H]C1(N([C@@H]2CCCC[C@H]2NC(=O)CC(CC(C)C)NC1=O)C(=O)CNC(=O)OCC1=CC=CC=C1)C1=C(OC)C=CC(Br)=C1

[H][C@@]12CC[C@H]([C@H](C)CCC(=O)N3CC(C)C)CNC(=O)C(CC(C)C)NC(=O)C3C3=CC(Br)=CC=C3)[C@@]1(C)CC[C@@]1([H])[C@@]2([H])CC[C@]2([H])C[C@H](O)CC[C@]12C

CC(CC1=CC=C(C=C1)C(C)(C)C)C1N(CC(C)C)CNC(=O)CCNC1=O)C(=O)C(O)C1=CC=CC=C1

COC1=C(OCC2=CC=CC=C2)C=CC(=C1)C1N(CCCCCCNC(=O)CC(NC1=O)C1=CC=C(Cl)C=C1)C(=O)CC1CCC=C1

COC1=CC=C(CC2(C)N(CCCCCNC(=O)CC(NC2=O)C2=CC=C(Cl)C=C2)C(=O)C2=CC(I)=CC=C2)C=C1

CCOC(=O)CC1(CC(=O)OCC)N(CCCCCNC(=O)C(CC2=CC=CC=C2)NC1=O)C(=O)C1=CC=C2C=C(OC)C=CC2=C1

CCC(Br)C(=O)N1CC(C)(C)CNC(=O)C(CC2=CNC3=C2C=CC=C3)NC(=O)C11CCC(C2=CC=CC=C2)C2=C1C=CC=C2

COC1=CC=C(C=C1)C1CC(=O)NCCCCCCCCCCCNC(C(C2=C(C=CC=C2)B2OC(C)(C)C(C)O2)C(=O)N1)C(=O)C1=CC=C(C)S1

[Cl].O=C(CC1=C[NH2+][C=N1)N1CCCCCNC(=O)C(CC2=CC=CC=C2)NC(=O)C11C2C3CC(C2)CC1C3

COC(=O)CCCC1N(CCOCOCNC(=O)CC(NC1=O)C1=CC=C(Cl)C=C1)C(=O)CC1=CC=CC=C1[N+][[O-]]=O

CCOC(=O)CC1(CCl)N(CCCCCCNC(=O)CCNC1=O)C(=O)CCNC(=O)OC(C)(C)C

CC(C)(C)C1=CC(=CC(=C1O)C(C)(C)C)C(=O)N1CCCCCCCCCNC(=O)CCCCCNC(=O)C1C1=CC=CC=C1OC(F)(F)F

CSCCC1N(CCCCCNC(=O)CC(CC(C)C)NC1=O)C(=O)CCC=C

OC1=CC=C(CCC(=O)N2CCSCCNC(=O)CCNC(=O)C2C2=CC=C3C=NNC3=C2)C=C1

[H][C@@]12CC[C@H]([C@H](C)CCC(=O)N3CCSCCNC(=O)CCCCCNC(=O)C33CCC(CC3)N(CC)CCC)[C@@]1(C)C(=O)C[C@@]1([H])[C@@]2([H])C(=O)CC2CC(=O)CC[C@]12C

COC(C(=O)N1CCCCCCCCCNC(=O)C(CC2=CC=CC=C2)NC(=O)C1C1=CC=C(F)C=C1)C1=CC=CC=C1

O=C(CCC1=CC=C2OCOC2=C1)N1CCNC(=O)CCNC(=O)C11CCOCC1

COC1=C(OCC2=CC=CC=C2)C=C(CC(=O)N2CCCCCNC(=O)CCNC(=O)C22C(C)CCC3=CC=CC=C23)C=C1

[H]C(=O)C1=CC=CC=C1C1([H])N(CC(C)C)CNC(=O)CC(NC1=O)C1=CC=C(OC)C=C1)C(=O)C1=CN=C2C=CC=CC2=N1

[H]C1(N(CCCCCCCCCCNC(=O)CC(CC(C)C)NC1=O)C(=O)C=C)C1=CC=C(OC)C(OC)=C1C1

COC1=CC=CC(OC)=C1C(=O)N1CCOCOCNC(=O)C(CC2=CNC3=C2C=CC=C3)NC(=O)C11CCCC2=C1C=CC=N2

COC1=C(OCC2=CC=CC=C2)C=C(CC(=O)N2CCCCCNC(=O)CCCCCNC(=O)C2(C)C)C=C1

O=C(N1[C@@H]2CCCC[C@H]2NC(=O)CC(NC(=O)C1C1=CC=CN=C1)C1=CC=CC=C1)C1=CN=C2C=CC=CC2=N1

[H]C1(N(CCCCCCNC(=O)C(NC1=O)C(C)C)C(=O)[C@H](C)NC(=O)OCC1=CC=CC=C1)C1=CC(OC)=CC(OC)=C1

[H]C1(N(CC(O)CNC(=O)C(CC2=CNC3=C2C=CC=C3)NC1=O)C(=O)C=C)C1=CC=C(Br)S1

COC1=CC=CC(OC)=C1C(=O)N1CCCCCNC(=O)CNC(=O)C1C1=CC=C2C=NNC2=C1

[H]C1(N(CC(C)C)CNC(=O)CC(CC(C)C)NC1=O)C(=O)C1=C(Cl)C2=C(S1)C=CC=C2)C1=CC=C(OCC2=CC=CC=C2)C(OC)=C1

CCOC(=O)CC1(C(C)C)N(C(C(NC(=O)CNC1=O)C1=CC=CC=C1)C1=CC=CC=C1)C(=O)C1=CN=C(C)C=N1

OC1=CC=C(CC(=O)N2CCSCCNC(=O)C(CC3=CNC4=C3C=CC=C4)NC(=O)C2C2=CC=C(C=C2)C#N)C=C1C1

FC1=CC=C(C2N(CCCCCCCCNC(=O)C(CC3=CC=CC=C3)NC2=O)C(=O)C2=CC(I)=CC=C2)C(CI)=C1  
COC1=CC2=CC=C(C=C2C=C1)C(=O)N1CCCCCCCCNC(=O)CCNC(=O)C11CCN(CC1)C(=O)OC(C)(C)C  
CCC(Br)C(=O)N1CCCCCCCCNC(=O)C(NC(=O)C1(CBr)C1=CC=CC(F)=C1)C(C)C  
CC(CC1=CC=C(C=C1)C(C)(C)C)C1N(CCCCNC(=O)C(CC2=CC=CC=C2)NC1=O)C(=O)C(F)(F)F  
[H]C(=O)CCCC1([H])N(CCOCCOCCNC(=O)CCCCNC1=O)C(=O)C1=CN=C2C=CC=CC2=N1  
CCOC(=O)C(CI)C1(C)N(CCCCCNC(=O)C(CC(C)C)NC1=O)C(=O)[C@H](C)NC(=O)OCC1=CC=CC=C1  
COC(=O)CCCC1(C)N([C@@H]2CCCC[C@H]2NC(=O)C(CC(C)C)NC1=O)C(=O)CC1=CC(OC)=CC(OC)=C1  
COC(OC)C1(C)N(CCSCCNC(=O)CC(NC1=O)C1=CC=CC=C1)C(=O)CCN1C2=C(SC3=C1C=CC=C3)C=CC=C2  
COC1=CC=C2CCC3(N(CCSCCNC(=O)CCCCNC3=O)C(=O)C3=C4C=CC=CC4=CC=C3)C2=C1  
[H]C(=O)C1=CC=CC=C1C1([H])N(CCSCCNC(=O)C(NC1=O)C(C)C)C(=O)C1=CC=CC=C1C  
COC1=CC=C(C=C1)C1CC(=O)NCCSCCN(C(=O)C2=CC=C(CBr)C=C2)C2(CCCC3=C2C=CC=N3)C(=O)N1  
CCCCC(=O)N1CCCNC(=O)C(NC(=O)C1(C)C1=CC=CC=C1OC)C(C)C  
O=C(N1CCCCCCCCNC(=O)CC(NC(=O)C11CCCN(CC2=CC=CC=C2)C1)C1=CC=CC=C1)C1=CC2=C(NC=N2)C=C1  
CC1=CC2(CCC1)N(CCCCCCCCCNC(=O)CC(NC2=O)C1=CC=CC=C1)C(=O)C1=C(CI)C=CC=C1C1  
CCC1(C)N(CCCCNC(=O)C(CC(C)C)NC1=O)C(=O)CC1=CC(=CC=C1)[N+][[O-]]=O  
C=CCCCCCCCC(=O)N1C(C(NC(=O)CCNC(=O)C11CCOCC1)C1=CC=CC=C1)C1=CC=CC=C1  
CC(C)CC1CC(=O)NCCCCCCCCCN(C(=O)CC2=CC(O)=C(OCC3=CC=CC=C3)C=C2)C2(CCC=C2)C(=O)N1  
O=C(CC1=CC=C2OCOC2=C1)N1CCNC(=O)CNC(=O)C1C1CC1  
C\C=C(/C)C1N(CC(O)CNC(=O)CC(CC(C)C)NC1=O)C(=O)C1=CC2=C(NN=N2)C=C1  
COC1=CC=C(C=C1)C1CC(=O)NCC(C)(C)CN(C(=O)C2=CC=C(Br)C=C2)C(C)(C=O)C(=O)N1  
[H]C1(N(CCCCCCNC(=O)CNC1=O)C(=O)[C@@H](NC(=O)OC(C)(C)C)C(C)C)C1=CC=CS1  
CCCCCCCCCCCCCCCCC(=O)N1CC(O)CNC(=O)CCCCNC(=O)C1CNC(=O)OC(C)(C)C  
COC1=CC(OC)=C(OC)C=C1C(=O)N1CCSCCNC(=O)CCCCNC(=O)C1C1=CC(Br)=CC=C1  
COC(=O)CCCC1N(CCCCCCNC(=O)CCCCNC1=O)C(=O)CCC(=O)C1=CC=C(F)C=C1  
O=C(C#C)N1CCOCCOCCNC(=O)CCNC(=O)C1C1=CC=C(OCC2=CC=CC=C2)C=C1  
CC(C)CC1(C)N(CCCCCCNC(=O)C(CC2=CNC3=C2C=CC=C3)NC1=O)C(=O)C1=C(O)C=CC(O)=C1  
COC1=CC=CC=C1CC(=O)N1CCSCCNC(=O)CCNC(=O)C1\C=C(/C)CCC=C(C)C  
COC1=CC=C2C(CCCC22N(CCCCCCNC(=O)CCCCCNC2=O)C(=O)CCC2=CC=CC(OC(=O)C3=CC=CC=C3)=C2)=C1  
[O-][N+](=O)C1=CC=C(C=C1)C1N(CCCCCCCCCNC(=O)CC(NC1=O)C1=CC=C(CI)C=C1)C(=O)C1=CC=CC=C1I  
COC1=CC(=CC(OC)=C1OC)C1N(CCNC(=O)C(CC2=CC=CC=C2)NC1=O)C(=O)C1=C(O)C=CC(O)=C1  
COC1=CC=CC=C1CC1(\C=C\C2=CC=CC=C2)N([C@@H]2CCCC[C@H]2NC(=O)CC(CC(C)C)NC1=O)C(=O)C1=CC2=C  
C(S1)C=CC=C2

COC1=CC(CC(=O)N2CCCCCCCCCCCCN(C(=O)CC(NC(=O)C2\C(C)=C\C)C2=CC=C(C1)C=C2)=CC(OC)=C1  
 OC1=CC=C(CCC(=O)N2CCCCCNC(=O)C(CC3=CC=CC=C3)NC(=O)C2C2=CSC3=C2C=CC=C3)C=C1  
 [O-][N+](=O)C1=CC2=C(OC(=O)C)C=C1C1N(CCCCCN(C(=O)CC(NC1=O)C1=CC=C(C1)C=C1)C(=O)CC1CC2CCC1C2  
 OC(=O)C1=CC=C(C=C1)C1N(CCNC(=O)CCNC1=O)C(=O)C1=CC(I)=CC=C1  
 COC1=CC2=CC=C(C=C2C=C1)C(=O)N1CCCCCNC(=O)CCCCN(C(=O)C1(C)C1=CC=C(C1)C(C1)=C1  
 CCC(Br)C(=O)N1CCCCCNC(=O)CC(NC(=O)C1C1=CC(OC)=C(OC)C=C1[N+][O-])C1=CC=C(OC)C=C1  
 CC1=CC=C(S1)C(=O)N1CCNC(=O)C(CC2=CC=CC=C2)NC(=O)C1C1=CC=C(Br)C=C1[N+][O-]=O  
 COC1=CC=C(CC2(C)N(CCCCCCCCCN(C(=O)C(NC2=O)C(C)C)C(=O)CC2=CC=C(C1)C=C2)C=C1  
 CC1(C)CNC(=O)CC(NC(=O)C2(CCN(CC3=CC=CC=C3)CC2)N(C1)C(=O)CCBr)C1=CC=C(C1)C=C1  
 O=C(CC12CC3CC(CC(C3)C1)C2)N1CCCCCNC(=O)C(CC2=CNC3=C2C=CC=C3)NC(=O)C1C1=CC2=C(NC=C2)C=C  
 1  
 FC(F)(F)C1=CC=C(C=C1)C1N(CCCCCCCCCN(C(=O)CCNC1=O)C(=O)C1=C2C=CC=CC2=CC2=CC=CC=C12  
 CN1C2CCC1CC1(C2)N(CCCCCCCCCN(C(=O)CCNC1=O)C(=O)C1=C2C=CC=CC2=CC2=CC=CC=C12  
 CN1CCC2(CC1)N(CCCCCCCCCN(C(=O)CNC2=O)C(=O)C1=C2C=CC=CC2=CC2=CC=CC=C12  
 CIC1=CC=C(C=C1)C1CC(=O)N[C@@H]2CCCC[C@H]2N(C(CCCCCCCC=C)C(=O)N1)C(=O)C1=NC2=C(N1)C=CC=C2  
 [H][C@]12CS[C@@H](CCCC(=O)N3C(C(NC(=O)CC(CC(C)C)NC(=O)C3C3=C(C1)C=CC(F)=C3)C3=CC=CC=C3)C3  
 =CC=CC=C3)[C@@]1([H])NC(=O)N2  
 CCC1(N(CCSCCNC(=O)C(CC2=CC=CC=C2)NC1=O)C(=O)C1=CC2=C(O1)C=CC=C2)C1=CC=CS1  
 CCCC(=O)N1CCNC(=O)CCCCN(C(=O)C1(CC)C1=CC=C(C1)C=C1  
 CC(C)CC1NC(=O)C(N(CCCCCN(C1=O)C(=O)C1=CC=C2C=CC=CC2=C1)C1=CC2=C(OC(=O)C)C=C1[N+][O-])=O  
 COC(=O)C1(N(CCOCCOCCNC(=O)CNC1=O)C(=O)C(F)(F)C)C1=CC=CC=C1  
 BrC1=CC=C(C=C1)C(=O)N1[C@@H]2CCCC[C@H]2NC(=O)CNC(=O)C11CCCN(CC2=CC=CC=C2)C1  
 CC(C)[C@H](NC(=O)OC(C)(C)C)C(=O)N1CCNC(=O)CCNC(=O)C11CC2CCC(C1)N2C  
 COC1=CC=C(C=C1)C1CC(=O)NCCCNC(C2=C(F)C=C(F)C=C2)C(=O)N1)C(=O)C(O)=O  
 FC1=CC=CC(C1)=C1C1N(CCOCCOCCNC(=O)CC(NC1=O)C1=CC=C(C1)C=C1)C(=O)CC1=CC=C(Br)C=C1  
 [H][C@]12CS[C@@H](CCCC(=O)N3CCCNC(=O)CC(NC(=O)C3([H])\C=C\C3=CC=CC=C3)C3=CC=CC=C3)[C@@]1  
 ([H])NC(=O)N2  
 [H]C1(N(CCOCCOCCNC(=O)C(CC(C)C)NC1=O)C(=O)C1=CC=C(C=C1)N(C)C)C1=CC(OC)=CC=C1OC  
 CC1=C(C=CC=C1C(=O)N1CCOCCOCCNC(=O)CC(NC(=O)C1C1=CC=C(Br)S1)C1=CC=CC=C1)[N+][O-]=O  
 FC1=CC=C(C=C1)C(=O)CCC(=O)N1[C@@H]2CCCC[C@H]2NC(=O)C(CC2=CC=CC=C2)NC(=O)C1C1=CC=C(OC2  
 =CC=CC=C2)C=C1  
 [H]C1(CCCCC)N(CCCCCN(C(=O)CC(NC1=O)C1=CC=C(OC)C=C1)C(=O)C1=CC=C(C)S1  
 CC(C)(C)OC(=O)NCCC(=O)N1CCCCCNC(=O)CC(NC(=O)C1C1=C(O)C=C(O)C=C1)C1=CC=CC=C1

CC(C)C1NC(=O)C2(CCCC3=C2C=CC=C3)N(CC(O)CNC1=O)C(=O)C1=CC2=C(N1)C=CC(C1)=C2  
 CC1=CC=CC(=C1)C1N(CCCCCCCCCCNC(=O)CC(NC1=O)C1=CC=CC=C1)C(=O)\C=C1=CC=CS1  
 [H]C1(N([C@@H]2CCCC[C@H]2NC(=O)C(CC2=CNC3=C2C=CC=C3)NC1=O)C(=O)CC1=CC(=C(O)C=C1)[N+](O-)=O)C1=CC2=C(OCO2)C=C1  
 CC(C)[C@H](NC(=O)OCC1=CC=CC=C1)C(=O)N1CCCCNC(=O)C(NC(=O)C11CC(CC=C1C)C(C)=C)C(C)C  
 CCC(Br)C(=O)N1CC(O)CNC(=O)C(CC2=CNC3=C2C=CC=C3)NC(=O)C1C1=CC=C(F)C=C1  
 [H]C1(N(CCCNC(=O)CC(NC1=O)C1=CC=C(Cl)C=C1)C(=O)C(C)=C)C(O)=O  
 [H]C1(\C=C\N(CCCCCNC(=O)CC(CC(C)C)NC1=O)C(=O)CBr  
 CC(C)(C)OC(=O)N[C@@H](CC1=CC=CC=C1)C(=O)N1CC(O)CNC(=O)CC(NC(=O)C1C1=CC(OCC2=CC=CC=C2)=C=C1)C1=CC=CC=C1  
 CC(C)CC1NC(=O)C(N(C(C(NC1=O)C1=CC=CC=C1)C1=CC=CC=C1)C(=O)C1=CC=CC(=C1C)[N+](O-)=O)C1=C(O)C=CC=C1  
 CC(C)CC1NC(=O)C2(CCSC3=C2C=CC=C3)N(CC(C)(C)CNC1=O)C(=O)CC1=CNC2=C1C=C(O)C=C2  
 CC(C)CC1NC(=O)C2(CCSC3=C2C=CC=C3)N(C(C(NC1=O)C1=CC=CC=C1)C1=CC=CC=C1)C(=O)COC1=CC=C(Br)C=C1  
 COC1=C(OC)C=C(C=C1)C(C)C(=O)N1CCCNC(=O)C(CC(C)C)NC(=O)C1CCC1=CC=CC=C1  
 COC(=O)C1=C(C2N(CCNC(=O)C(CC3=CC=CC=C3)NC2=O)C(=O)C2=CC3=C(O2)C=CC=C3)C(OC)=CC(OC)=C1  
 COC1=CC=CC=C1CC1(C)N(CCCCCNC(=O)CNC1=O)C(=O)CCCBr  
 COC1=CC=C2C=C(C=CC2=C1)C(C)C(=O)N1CC(O)CNC(=O)CCCCNC(=O)C1(C)CC1=CC=CC=C1  
 CC\C=C\N1CCSCCNC(=O)CCCCNC(=O)C1C1=C(OC)C(OC)=CC=C1  
 COC1=C(OCC2=CC=CC=C2)C=C(CC(=O)N2CCNC(=O)CNC(=O)C2C2=C(O)C=CC=C2)C=C1  
 CC(C)[C@H](NC(=O)OC(C)(C)C)C(=O)N1CCCCCCCCCNC(=O)C(CC2=CC=CC=C2)NC(=O)C1(C1CC1)C1=CC=CC=C1  
 COC1=CC=C(C=C1)C1CC(=O)N[C@@H]2CCCC[C@H]2N(C(\C=C(/)CCC=C(C)C)C(=O)N1)C(=O)CCCNC(=O)OCC1=CC=CC=C1  
 O=C(CCCC1=CC=CC=C1)N1CCCCCCCCCNC(=O)CCCNC(=O)C1(C1=CC=CC=C1)C1=CC=CC=C1  
 CCOC(=O)C1CC1C1N(CCCCCCNC(=O)CCCNC1=O)C(=O)C(O)=O  
 CCOC(=O)C1N(CCCCCCNC(=O)C(CC2=CC=CC=C2)NC1=O)C(=O)C1=CC=CC=C1  
 CC(C)C1NC(=O)C(N(CCCCCCCCCCNC1=O)C(=O)CC1=CC=C(Br)C=C1)C1=C(Cl)C=CC=C1F  
 [H][C@]12CS[C@@H](CCCC(=O)N3CCNC(=O)CC(NC(=O)C3([H])\C=C\3=CC=CC=C3)C3=CC=CC=C3)[C@@]1([H])NC(=O)N2  
 [H]C1(N(CCCCCNC(=O)CNC1=O)C(=O)C1=CC2=C(O1)C=CC=C2)C1=CC=CC(O)=C1  
 CCCC(=O)N1CC(O)CNC(=O)CCCCNC(=O)C1C1=CC2=CC=CC=C2S1  
 CC1(N(CCSCCNC(=O)CCCCNC1=O)C(=O)C1=CC=C2C=CC=CC2=C1)C1=CC=C(Cl)C(Cl)=C1  
 COC1=C(OC)C=C(C=C1)C1N(CCCCCCNC(=O)CCCNC1=O)C(=O)C1=CC=CC(O=C1O)[N+](O-)=O



[H]C1(N(CC(C)(C)CNC(=O)CC(NC1=O)C1=CC=C(OC)C=C1)C(=O)C1=CC=C(CBr)C=C1)C1=C(Br)C=CC(OC)=C1  
 FC1=CC(=CC=C1)C1(CBr)N(CCSCCNC(=O)CCCNC1=O)C(=O)C1=CC2=C(NC=N2)C=C1  
 COC(=O)CCC1(C)N(CCCCNC(=O)C(CC2=CC=CC=C2)NC1=O)C(=O)[C@H](COCC1=CC=CC=C1)NC(=O)OC(C)(C)C  
 CC1=CC=C(C=C1)C1N(CC(C)(C)CNC(=O)CCNC1=O)C(=O)C1=CC2=C(C=C1)C=C(O)C=C2  
 COC1=CC=CC2=C1C1(CC2)N(CCCCCNC(=O)CCNC1=O)C(=O)C1(C)CCCCC1  
 CC(CC1=CC=C(C=C1)C(C)(C)C)C1N(CCCCCCNC(=O)CC(NC1=O)C1=CC=C(C1)C=C1)C(=O)CC1=CC=C(O)C=C1[N+]  
 N+][[O-]]=O  
 COC(=O)C1=C(C2N(CCCCCCNC(=O)CC(NC2=O)C2=CC=CC=C2)C(=O)C(C)C)C(OC)=CC(OC)=C1  
 COC(C(=O)N1C(C(NC(=O)CC(CC(C)C)NC(=O)C1C1=CC=C(OCC2=CC=CC=C2)C=C1)C1=CC=CC=C1)C1=CC=CC=C1)  
 C1=CC=CC=C1  
 [H]C1(N(CCCCCCNC(=O)C(CC2=CC=CC=C2)NC1=O)C(=O)CCC1=CC=C2OCOC2=C1)C1=CC2=C(OCOC2)C=C1  
 COC1=CC=C(C=C1)C(=O)N1CC(C)(C)CNC(=O)C(CC2=CNC3=C2C=CC=C3)NC(=O)C1C1=C(O)C=CC=C1  
 COC1=CC=C(C=C1)C1CC(=O)NCCCCCCCCCCCCN(C(=O)C2=C(C)C=C(C)C=C2)C(C)(C=C(C)C)C(=O)N1  
 CCC(C)C1N([C@@H]2CCCC[C@H]2NC(=O)CCCNC1=O)C(=O)C1=CNC2=C1C=CC=C2  
 COC1=CC=C(C(=O)N2CCOCCOCCNC(=O)CCCNC(=O)C2(CCI)C2=CC=CC=C2)C(=O)[N+][[O-]]=O  
 COC(=O)C1=C(C2N(CCCCCCNC(=O)CCNC2=O)C(=O)CC2=CC=CC=C2[N+][[O-]]=O)C(OC)=CC(OC)=C1  
 CIC1=CC=C(C=C1)C1CC(=O)NCCSCCN(C(=O)C2=CC(I)=CC=C2)C2(CCC(CC2)C2=CC=CC=C2)C(=O)N1  
 OC1CNC(=O)CC(NC(=O)C2(CCCC=C2)N(C1)C(=O)C1=CC2=C(N1)C=CC(C1)=C2)C1=CC=C(C1)C=C1  
 CC1(CO)N(CCCNC(=O)CC(NC1=O)C1=CC=C(C1)C=C1)C(=O)C=C\C1=CC=CS1  
 COC1=CC=CC(OC)=C1C(=O)N1CCCCCCCCCNC(=O)CC(CC(C)C)NC(=O)C11CC2CCC1(C)C2(C)C  
 [Cl-].CC1(C)C2CCC1(C(O)=O)C1(C2)N(CCCNC(=O)CC(NC1=O)C1=CC=CC=C1)C(=O)CC1=C[NH2+]C=N1  
 CC(C)CC1NC(=O)C(N(CCOCCOCCNC1=O)C(=O)C1=CC=C(O)C=C1O)C1=C(F)C=CC=C1F  
 CC1(N(CCOCCOCCNC(=O)CC(NC1=O)C1=CC=CC=C1)C(=O)CC1=CC=C(C1)C=C1)C1=CC=CC2=C1C=CC=C2  
 COC1=CC(=CC(OC)=C1OC)C1N([C@@H]2CCCC[C@H]2NC(=O)C(CC2=CC=CC=C2)NC1=O)C(=O)CCBr  
 FC1=CC=CC(=C1)C1N(C(C(NC(=O)CC(NC1=O)C1=CC=CC=C1)C1=CC=CC=C1)C1=CC=CC=C1)C(=O)C1=NC2=C(N  
 1)C=CC=C2  
 [H]C(=O)CCCC1([H])N(CC(C)(C)CNC(=O)C(NC1=O)C(C)C)C(=O)C1=CC=C(Br)O1  
 CCOC(=O)C(CC)C1(C)N(CCCCCCCCCCNC(=O)CNC1=O)C(=O)CCCC1=CC(O)=C(OC)C=C1  
 [H]C1(N(C(C(NC(=O)CC(CC(C)C)NC1=O)C1=CC=CC=C1)C1=CC=CC=C1)C(=O)C1=CC(OC)=C(OC)C(OC)=C1)C1=C  
 C=C(Br)C=C1  
 CCC(C)C(=O)N1CC(C)(C)CNC(=O)CC(NC(=O)C1C1=CC=CC=C1[N+][[O-]]=O)C1=CC=CC=C1  
 [H]C1(N(CCCNC(=O)CCCNC1=O)C(=O)CCC1=CC=CC(OC(=O)C2=CC=CC=C2)=C1)C1=CC=C(C)S1  
 CC(C)C1NC(=O)C2(CCSC3=C2C=CC=C3)N(CCCCCCNC1=O)C(=O)CNC(=O)OCC1=CC=CC=C1  
 OC1CNC(=O)C(CC2=CNC3=C2C=CC=C3)NC(=O)C(N(C1)C(=O)CC1=CC=C(O)C=C1)C1=CC=CC=C1OC(F)(F)F

CCC1(N(CCCCNC(=O)C(CC2=CC=CC=C2)NC1=O)C(=O)C=C\C1=CC(=CC=C1)C(F)(F)F)C1=CC=CC=C1  
 CC1(C)CNC(=O)CCNC(=O)C(N(C1)C(=O)C1=CN=C2C=C(C1)C=CC2=C1O)C1=C(O)C=CC=C1  
 COC(=O)C1(N(CCCCCNC(=O)CCNC1=O)C(=O)C=C\C1=CC=CS1)C1=CC=CC=C1  
 COC1=CC=CC(OC)=C1C(=O)N1CCCCCCCCNC(=O)C(CC2=CC=CC=C2)NC(=O)C11CCCN(CC2=CC=CC=C2)C1  
 CC(C)CC1NC(=O)C(N(C(C(NC1=O)C1=CC=CC=C1)C1=CC=CC=C1)C(=O)C1=CC=C(Br)C=C1)C1=CC=CC=C1[N+](O-)=O  
 CCCCCCCCCCCCCCCCCC(=O)N1CCCCCCCCNC(=O)CCNC(=O)C1(C(F)(F)F)C(F)(F)F  
 OC(=O)CC1(CC(O)=O)N(CCCCCCCCCNC(=O)CC(NC1=O)C1=CC=C(C1)C=C1)C(=O)CCC(=O)C1=CC=C(F)C=C1  
 COC1=C(OC)C=C(CC(=O)N2CCCCCCCCNC(=O)CCCCNC(=O)C2C2=CC=C(C=C2)C(F)(F)F)C=C1  
 CN1C2CCC1CC1(C2)N(CCNC(=O)CCNC1=O)C(=O)CC#N  
 [H]C1(N(CCCNC(=O)C(NC1=O)C(C)C)C(=O)C(OC)(C1=CC=CC=C1)C(F)(F)F)C1=CC(OC)=CC(OC)=C1  
 [H]C1(N(CCCCCNC(=O)C(NC1=O)C(C)C)C(=O)CC1=CC=C(C)C=C1)C1=CC=C(OC)C=C1  
 CC1=C(\C=C/S)C2(CCC1)N(CCCCCCCCCNC(=O)CCCCNC2=O)C(=O)C(O)=O  
 [H]C1(N(CCSCCNC(=O)CC(CC(C)C)NC1=O)C(=O)CC1=CC=C(O)C=C1)C1=CC(OC)=CC=C1  
 CC1(CC(=O)OCC2=CC=CC=C2)N(CCCCCCCCCCCCCNC(=O)CCCCNC1=O)C(=O)CCOCC1=CC=CC=C1  
 CC1(N(CCCCCNC(=O)CCCCNC1=O)C(=O)CC12CC3CC(CC(C3)C1)C2)C1=C(O)C=CC(Br)=C1  
 [H]C1(N(C(C(NC(=O)C(NC1=O)C(C)C)C1=CC=CC=C1)C1=CC=CC=C1)C(=O)C1=NC2=C(N1)C=CC=C2)C1=C(O)C=CC(Br)=C1  
 [H][C@@]12CC[C@H]([C@H](C)CCC(=O)N3CCCCNC(=O)C(CC4=CC=CC=C4)NC(=O)C3(C)CC(=O)OC)[C@@]1(C)CC[C@@]1([H])[C@@]2([H])CC[C@]2([H])C[C@H](O)CC[C@]12C  
 CC1(N(CCCCCCCCCNC(=O)CCCNC1=O)C(=O)CCCCC1)C1=CC=CC(F)=C1  
 [H]C1(N(CCNC(=O)CCCNC1=O)C(=O)C1=C(C1)C=CC=C1C1)C1=C(Br)C=CC(OC)=C1  
 CC(C)CC1CC(=O)NCCCN(C(=O)C(C)OC(=O)NC2=CC=CC=C2)C2(CCC(CC3=CC=CC=C3)C3=CC=CC=C23)C(=O)N1  
 CC(C)(C)OC(=O)N1C=C(C2N(CCCNC(=O)C(CC3=CNC4=C3C=CC=C4)NC2=O)C(=O)CC2=CC(=CC=C2)[N+](O-)=O)C2=C1C=CC=C2  
 COC1=CC=CC=C1CC1(\C=C\C2=CC=CC=C2)N(CC(O)CNC(=O)CCCNC1=O)C(=O)C1=CC(I)=CC=C1O  
 CC1(N(CCCCCCCCCCCCCNC(=O)CCCCNC1=O)C(=O)C=C\C1=CC=CO1)C1=CC(=CC(=C1)C(F)(F)F)C(F)(F)F  
 [H]C1(N(C(C(NC(=O)CCCCNC1=O)C1=CC=CC=C1)C1=CC=CC=C1)C(=O)CC1)C1=CC=CC=C1[N+](O-)=O  
 CC(C)C1(C)N(CC(O)CNC(=O)CC(NC1=O)C1=CC=CC=C1)C(=O)C1=NC2=C(N1)C=CC=C2  
 CC(=O)N[C@@H](CS)C(=O)N1CCOCCOCCNC(=O)CCCCNC(=O)C1C1=CC(Br)=CC=C1  
 COC(=O)CCCCC1N(CCCCCCCCCCCCCNC(=O)CNC1=O)C(=O)C(O)C1=CC=CC=C1  
 C[C@@H](OCC1=CC=CC=C1)[C@H](NC(=O)OC(C)(C)C)C(=O)N1C(C(NC(=O)C(CC2=CNC3=C2C=CC=C3)NC(=O)C1C1=CC=C(COC(C)=O)O1)C1=CC=CC=C1)C1=CC=CC=C1  
 CC(C)CC1N(CCCNC(=O)CCCCNC1=O)C(=O)[C@@H](NC(=O)OCC1=CC=CC=C1)C(C)C

COC(=O)C1(N(CCCCCNC(=O)CCNC1=O)C(=O)C(Br)C1=CC=CC=C1)C1=CC=CC=C1  
 OC1CNC(=O)CCNC(=O)C2(CCC=C2)N(C1)C(=O)CCCB  
 COC1=CC=C2C=C(C=CC2=C1)C(C)C(=O)N1[C@@H]2CCCC[C@H]2NC(=O)CCNC(=O)C1C1CC1  
 COC1=C(C(=O)N2CCCCCNC(=O)C(NC(=O)C22CCC2)C(C)C)C(=CC=C1)[N+][O-]=O  
 COC1=CC2=C(CCCC22N(CCCCCCNC(=O)CCCCNC2=O)C(=O)CNC(=O)OC(C)(C)C)C=C1  
 CC1=C(Br)C=CC=C1C(=O)N1CCCCCCCCCNC(=O)CNC(=O)C1COCC1=CC=CC=C1  
 CC(OC(=O)NC1=CC=CC=C1)C(=O)N1CCCCCCCCCCCCCNC(=O)CC(NC(=O)C1C1=C(F)C=CC=C1)C1=CC=C(C1)C=C  
 1  
 O=C(CC1CC2CCC1C2)N1CCNC(=O)CCNC(=O)C11C2CC3CC(C2)CC1C3  
 COC1=CC=C(C=C\C(=O)N2CCCNC(=O)CC(NC(=O)C2C2=CC(Br)=CC=C2)C2=CC=CC=C2)C=C1  
 COC1=CC=C2CCC3(N(CCSCCNC(=O)CCCNC3=O)C(=O)C3=C(C)C4=C(O3)C=CC=C4)C2=C1  
 COC1=CC=C(C(=O)N2CCCNC(=O)CCCCCNC(=O)C2(CC2=CC=CC=C2)CC2=CC=CC=C2)C(OC)=C1OC  
 COC1=CC=CC(C=C\C(=O)N2CC(O)CNC(=O)CC(NC(=O)C2C2=CC=CC=C2[N+][O-])=O)C2=CC=C(C1)C=C2)=C1OC  
 [H]C1(N(C(C(C)C)C)CNC(=O)CC(NC1=O)C1=CC=C(C1)C=C1)C(=O)C(O)C1=CC=CC=C1)C1=CC=C(OC)C(OC)=C1  
 CC(=O)N1CCCCCNC(=O)C(CC2=CNC3=C2C=CC=C3)NC(=O)CCC(O)=O)C1(C)C1=C(O)C=CC=C1  
 [H]C1(N(CCCNC(=O)CCCNC1=O)C(=O)C1=C(O)C=CC=C1O)C1=CC=C(O)C=C1  
 COC1=CC=C(CC2(C)N(CCCCNC(=O)C(NC2=O)C(C)C)C(=O)C2=CN=C3C=CC=CC3=C2)C=C1  
 OB(O)C1=CC=C(C=C1)C(=O)N1CCCCCCCCCNC(=O)CCCCCNC(=O)C11CCN(CC2=CC=CC=C2)CC1  
 COC1=CC=CC=C1CC(=O)N1CCSCCNC(=O)CC(CC(C)C)NC(=O)C1C1=CC(OC2=CC=CC=C2)=CC=C1  
 COC1=CC=C(C(=O)N2CCCCCCCCCCCCCNC(=O)CCCCCNC(=O)C22CCCC3=C2C=C(OC)C=C3)C(OC)=C1  
 CC(C)=CCC\C(C)=C\C1N(CCCCNC(=O)CCNC1=O)C(=O)C1=CSC=C1  
 COC(=O)CCC1(C)N(C(C(NC(=O)CNC1=O)C1=CC=CC=C1)C1=CC=CC=C1)C(=O)C1=CC=CC(OC)=C1O  
 CC(C)CC1CC(=O)NCCCCCCCCCCCCCNC(C(C2=C(C1)C=CC=C2)C(=O)N1)C(=O)C1=CC2=C(NN=N2)C=C1  
 [H]C1(N(CCCCCCNC(=O)CNC1=O)C(=O)C1=CN=C2C=CC=CC2=N1)C1=C(OC)C=CC(Br)=C1  
 COC1=CC=C(C=C1)C1CC(=O)NCCCNC(C2CC2)C(=O)N1)C(=O)C1=CC2=C(N1)C=CC(C1)=C2  
 COC1CC(C(OC)O1)C1N(CC(C)C)CNC(=O)C(NC1=O)C(C)C)C(=O)CC1=CC(OC)=CC(OC)=C1  
 [H]C1(\C=C\C2=CC=CC=C2)N(CCCCCCCCCCNC(=O)CNC1=O)C(=O)CCN1C2=C(SC3=C1C=CC=C3)C=CC=C2  
 CC(C)CC1NC(=O)C(N(C(C(NC1=O)C1=CC=CC=C1)C1=CC=CC=C1)C(=O)CC1CC2CCC1C2)C(C)C)C  
 CCC(Br)C(=O)N1CC(O)CNC(=O)CC(NC(=O)C1(C)C1=CC(=CC=C1)C(F)(F)F)C1=CC=C(C1)C=C1  
 OC1=C(C=C(CC(=O)N2CCCCCCCCCCCCCNC(=O)C(CC3=CNC4=C3C=CC=C4)NC(=O)C2C2=CC=CN=C2)C=C1)[N+]  
 [O-]=O  
 [H]C1(N([C@@H]2CCCC[C@H]2NC(=O)CCNC1=O)C(=O)[C@@H](NC(=O)OCC1=CC=CC=C1)C(C)C)C1=C(OC)C  
 =CC=C1

[H]C1(N(CCOCCOCCNC(=O)CCCNC1=O)C(=O)C(Br)CC)C1=CSC=C1

CC(=C)C(=O)N1CCCCCCCCCCCCNC(=O)CC(NC(=O)C1C1CC1)C1=CC=C(Cl)C=C1

CC(C)[C@H](NC(=O)OCC1=CC=CC=C1)C(=O)N1CCOCCOCCNC(=O)C(CC2=CNC3=C2C=CC=C3)NC(=O)C1C1=CC=C(C=C1)C1=CC=CC=C1

[H]C1(N(CCCCCCCCCCCCCNC(=O)CC(CC(C)C)NC1=O)C(=O)C(Br)C1=CC=CC=C1)C1=C(Br)C=CC(OC)=C1O

CC(=C)C1CC=C(C)C2(C1)N(CCOCCOCCNC(=O)C(CC1=CNC3=C1C=CC=C3)NC2=[O]C1=CC=C(C=C1)C(O)=O)C(C)=O

CC(C)CC1CC(=O)NCC(C)(C)CN(C(C2=CC=C(F)C=C2)C(=O)N1)C(=O)C1=C2C=CC=CC2=CC=C1

CC1(N(CCCCCCCCCCCCCNC(=O)CCCNC1=O)C(=O)CCCCCCCCC=C)C1=CC(O)=CC(O)=C1

CC1=C(SC=C1)C1N(CCCCCCCCCNC(=O)CCCNC1=O)C(=O)CC1=CC(O)=C(OCC2=CC=CC=C2)C=C1

CC(C)CC1CC(=O)NCC(O)CN(C(=O)CC2=CC=C3OCOC3=C2)C(C)(CC(C)C)C(=O)N1

COC1=CC=C(C=C1)C1CC(=O)NCC(C)(C)CN(C(=O)C2=CC=CC(O)=C2O)C2(CCCC2)C(=O)N1

[H]C1(N(CCNC(=O)CCNC1=O)C(=O)C(C)CC)C1=CC=C(Br)S1

O=C(CCC1=CC=CC(OC(=O)C2=CC=CC=C2)=C1)N1CCCCCCCCNC(=O)CCNC(=O)C1C1=CC=C2C=NNC2=C1

COC(=O)CCC1(C)N(CC(C)(C)CNC(=O)CNC1=O)C(=O)C1=C(O)C(=CC(=C1)[N+][O-])=O

[H]C1(N(CCCCCNC(=O)CCCCNC1=O)C(=O)CCCB)C1=C(Br)C=CC(OC)=C1

[H]C1(N(CCNC(=O)CCCNC1=O)C(=O)CC1CCCC1)C1=CC=CC(OC)=C1O

COC1=CC=C(C=C1)C1CC(=O)N[C@@H]2CCCC[C@H]2N(C(=O)CC2=CC(=CC=C2)[N+][O-])=O)C(CCl)(CCl)C(=O)N1

CCOC(=O)CC1(CCl)N(CCCCCCCCCCCCCNC(=O)CCCNC1=O)C(=O)C1=CC(I)=CC=C1O

CC1=CC=C(S1)C(=O)N1CCCCCCCCNC(=O)CC(NC(=O)C1C1=C(C=CC=C1)B1OC(C)(C)C(C)O1)C1=CC=CC=C1

COC1=CC=C(OC)C(=C1)C(=O)N1CC(O)CNC(=O)CC(CC(C)C)NC(=O)C1C1=CC=C(OCC(O)=O)C=C1

OC1=C2C=CC=CC2=C(O)C(=C1)C(=O)N1C(C(NC(=O)CNC(=O)C1C1=CC=C(C=C1)C(F)(F)F)C1=CC=CC=C1)C1=CC=CC=C1

O=C(CC1=CN=CC=C1)N1CCSCCNC(=O)C(CC2=CNC3=C2C=CC=C3)NC(=O)C1C1=CC(OC2=CC=CC=C2)=CC=C1

COC1=CC=C(C(=O)N2CCCCCCCCCCCCNC(=O)CC(NC(=O)C22CCCC3=C2C=CC=C3)C2=CC=C(Cl)C=C2)C(=C1)[N+][O-]=O

BrC1=CC=C(O1)C1N(CCCNC(=O)CC(NC1=O)C1=CC=CC=C1)C(=O)CCC1=CC=CC=C1

[H]C1(N([C@@H]2CCCC[C@H]2NC(=O)CCCCNC1=O)C(=O)C(C)CC)C1=C(OC)C=CC=C1

[H]C1(N(CCCCCCCCCCCCCNC(=O)C(CC2=CNC3=C2C=CC=C3)NC1=O)C(=O)CCC1=CC=CC(OC(=O)C2=CC=CC=C2)=C1)C1=CSC=C1

FC1=CC(=CC(F)=C1F)C1N(CCCNC(=O)C(CC2=CNC3=C2C=CC=C3)NC1=O)C(=O)CNC(=O)OCC1=CC=CC=C1

OC1=CC=C(CC(=O)N2CCCCCNC(=O)CNC(=O)C2C2=C(Br)C=CC=C2)C=C1

CC(C)CC1CC(=O)NCCN(C(=O)CC2=CC(Cl)=CC=C2)C(C)(C2=CC=C(Br)S2)C(=O)N1

[H]C1(N(CC(C)C)C)CNC(=O)CC(NC1=O)C1=CC=C(OC)C=C1)C(=O)C1=CC=C2C=CC=CC2=N1)C1=CC(OC)=CC=C1

COC1=C(C=CC=C1)C(=O)N1CCCNC(=O)CC(CC(C)C)NC(=O)C11CCCCCCCCC1  
 [H][C@@]12CS[C@@H](CCCC(=O)N3CCNC(=O)C(CC4=CC=CC=C4)NC(=O)C3C3=CC4=C(NC=C4)C=C3)[C@@]1  
 ([H])NC(=O)N2  
 O=C(N1CCCCCCCCCCCCNC(=O)C(CC2=CNC3=C2C=CC=C3)NC(=O)C1C1=CC(=CC=C1)C#N)C1=CC2=C(O1)C=C  
 C=C2  
 CCC(C(=O)OC)C1(C)N([C@@H]2CCCC[C@H]2NC(=O)CCCNC1=O)C(=O)C(C)C1  
 CC1(N(CCCCCCCCCNC(=O)CNC1=O)C(=O)CCCB1)C1=C(C=O)C=CC=C1  
 COC(=O)CC1(CCl)N(CCCCCCCCCCCCCNC(=O)CC(NC1=O)C1=CC=C(Cl)C=C1)C(=O)C(C)OC(=O)NC1=CC=CC=C1  
 CC(=C)C(=O)N1CCCCNC(=O)CCNC(=O)C1C1=C(O)C=C(O)C=C1  
 C[C@H](Cl)C(=O)N1[C@@H]2CCCC[C@H]2NC(=O)CC(NC(=O)C1(C)C1=CC=C(Cl)C(Cl)=C1Cl)C1=CC=CC=C1  
 OC1=CC(O)=CC(=C1)C(=O)N1CCCCCCCCNC(=O)CC(NC(=O)C11CCN(CC1)C(=O)OCC1=CC=CC=C1)C1=CC=CC=  
 C1  
 [H]C1(N(CCCCCCCCCNC(=O)CCCCNC1=O)C(=O)CC1=CC(OCC2=CC=CC=C2)=C(OC)C=C1)C1=CC(OC)=CC(OC)=  
 C1  
 [H]C1(N(CCSCNC(=O)CC(CC(C)C)NC1=O)C(=O)C(C)(C)C)C1=CC=C(OC)C=C1  
 COC1=CC=CC(=C1)C1CCCC11N(CCCCCNC(=O)CCNC1=O)C(=O)C1=CC=C(Br)C(C)=C1  
 CCOC(=O)C1N(CC(C)C)CNC(=O)CC(NC1=O)C1=CC=C(OC)C=C1)C(=O)C1=CC2=C(O1)C=CC=C2  
 CCCC(=O)N1CCCNC(=O)CC(CC(C)C)NC(=O)C1C1=C(Cl)C=CC=C1F  
 BrC1=CC=CC(=C1)C1N(CCCNC(=O)C(CC2=CNC3=C2C=CC=C3)NC1=O)C(=O)C1=CC=C2C=CC=CC2=C1  
 CC(CC1=CC=C(C=C1)C(C)C)C1N(CC(O)CNC(=O)CCCNC1=O)C(=O)C1=CC=CC(O)=C1O  
 COC(=O)C1=C(C2N(CCCCCCCCCCCCCNC(=O)CCCCNC2=O)C(=O)CCCl)C(OC)=CC(OC)=C1  
 CCC1(N(C(C(NC(=O)CCCCNC1=O)C1=CC=CC=C1)C1=CC=CC=C1)C(=O)CC1=CC=C(Cl)C=C1)C1=C(O)C=CC=C1  
 COC1=CC=C(C=C1)C1CC(=O)NCCOCCOCCN(C(C2=C(F)C(Cl)=CC=C2F)C(=O)N1)C(=O)CCBr  
 CC(C)C1NC(=O)C(N(C(C(NC1=O)C1=CC=CC=C1)C1=CC=CC=C1)C(=O)CC12CC3CC(CC(C3)C1)C2)C1=C(Cl)C=CC  
 =C1  
 O=C(OCC1=CC=CC=C1)N1CCC2(CC1)N(CCCCCCCCCCCCCNC(=O)CCCNC2=O)C(=O)C1=NC2=C(N1)C=CC=C2  
 [H][C@@]12CC[C@H]([C@H](C)CCC(=O)N3CCNC(=O)CCCNC(=O)C3C3=C(N)N=CN=C3)[C@@]1(C)CC[C@@]1([  
 H])[C@@]2([H])CC[C@]2([H])C[C@H](O)CC[C@]12C  
 COC1=CC=C(CC2(C)N([C@@H]3CCCC[C@H]3NC(=O)CC(NC2=O)C2=CC=C(OC)C=C2)C(=O)C(O)C2=CC=CC=C2)  
 C=C1  
 CCC1(N(CCCCCCCCCCCCCNC(=O)CCCNC1=O)C(=O)CC1=CC=C2C=CC=CC2=C1)C1=CC=CC=C1  
 CC1=CC2(CCC1)N(CCCCCCCCCNC(=O)CCCNC2=O)C(=O)C1=CC(Br)=CC=C1O  
 [O-][N+](=O)C1=CC=CC=C1CC(=O)N1CCNC(=O)C(CC2=CC=CC=C2)NC(=O)C11CCOC2=CC=CC=C12  
 COC1=CC=C(C=C1)C1CC(=O)NCCCCN(C(C2=C(Br)C=CC(O)=C2)C(=O)N1)C(=O)C1=CC(OC)=CC=C1OC  
 CC(C)(C)OC(=O)NC1=CC=CC(=C1)C1N(CCCCCCCCCNC(=O)CCCCNC1=O)C(=O)C1=CNC2=C1C=CC=C2

COC1=CC=C(C(=O)N2CCCCCNC(=O)CNC(=O)C2C2=C(C=CC=C2)B2OC(C)(C)C(C)O2)C(=C1)[N+][[O-]]=O  
 [H]C1(N(CC(O)CNC(=O)CCCCNC1=O)C(=O)CCC1=CC=CC=C1)C1=CC=C(OCC2=CC=CC=C2)C(OC)=C1  
 [H]C1(N(CCSCCNC(=O)CCCCCNC1=O)C(=O)CC1=CC(CI)=CC=C1)C1=CC(=CC=C1)[N+][[O-]]=O  
 CCOC(=O)C(F)C1(C)N(CCNC(=O)CNC1=O)C(=O)CCO  
 COC1=CC=CC2=C1C1(CC2)N(CCCCCCNC(=O)CCCCCNC1=O)C(=O)C1=C(O)C=CC(O)=C1  
 CC(C)C1NC(=O)C(C)(CO)N(CCCCCCNC1=O)C(=O)C1=CN=C2C=C(CI)C=CC2=C1O  
 BrC1=CC=CC(=C1)C(=O)N1CCCCCCCCCNC(=O)C(CC2=CC=CC=C2)NC(=O)C1C1=CC=CN1  
 O=C(CCN1C2=C(SC3=C1C=CC=C3)C=CC=C2)N1CCCCNC(=O)CCCCCNC(=O)C1C1=C2C=CC=CC2=CC=C1  
 C1CCCC1(N(CCCNC(=O)C(CC2=CC=CC=C2)NC1=O)C(=O)C1=C2C=CC=CC2=CC=C1)C1=CC=CC=C1  
 [H]C1(N(CCCCNC(=O)C(CC(C)C)NC1=O)C(=O)CCCCCCCCC=C)C1=CC=C(OC)C(OC)=C1  
 CCCCC(=O)N1CC(C)(C)CNC(=O)C(CC2=CN=C3=C2C=CC=C3)NC(=O)C1C(C)CC1=CC=C(C=C1)C(C)(C)C  
 COC1=CC=CC(\C=C\C(=O)N2CCCCNC(=O)CNC(=O)C2C2=C(C=CC=C2)C(F)(F)F)=C1OC  
 [H][C@@]12CC[C@H]([C@H](C)CCC(=O)N3C(C(NC(=O)CCCCNC(=O)C33CCC4=CC=CC=C4C3)C3=CC=CC=C3)C  
 3=CC=CC=C3)[C@@]1(C)C(=O)C[C@@]1([H])[C@@]2([H])C(=O)CC2CC(=O)CC[C@]12C  
 COC1=CC=C(C=C1)C1CC(=O)NCCOCCOCCN(C(C2=CC=C(Br)O2)C(=O)N1)C(=O)C(C)C1=CC2=CC=C(OC)C=C2C=  
 C1  
 COC1=C(OCC2=CC=CC=C2)C=CC(=C1)C1N(CCNC(=O)CC(NC1=O)C1=CC=C(CI)C=C1)C(=O)C(C)=C  
 FC(F)(F)OC1=CC=CC=C1C1N(CCCCCCNC(=O)CCCCCNC1=O)C(=O)CCC=C  
 OC1=CC=C(CCC(=O)N2CCSCCNC(=O)CCCCCNC(=O)C2C2=CC(F)=C(F)C(F)=C2)C=C1  
 [H]C1(\C=C\C2=CC=CC=C2)N(CCSCCNC(=O)C(NC1=O)C(C)C)C(=O)C1=C(C)C=CS1  
 COC1=CC=CC(O)=C1C(=O)N1CC(C)(C)CNC(=O)C(NC(=O)C1C1=CN=C2=C1C=C(CI)C=C2)C(C)C  
 OCC(C(=O)N1CCCNC(=O)C(CC2=CC=CC=C2)NC(=O)C1C1=CC2=CC=CC=C2S1)C1=CC=CC=C1  
 CC[O]=C1NCCCCC(=O)NCCCCN(C1C(=O)C1=CC=CC=C1)C(=O)\C=C\C(O)=O  
 OC1CNC(=O)CC(NC(=O)C(CBr)(N(C1)C(=O)C1=C(O)C=CC=C1O)C1=CC=C(CI)C=C1)C1=CC=CC=C1  
 CC1(N(CCSCCNC(=O)CNC1=O)C(=O)C1=CN=C2C=CC=CC2=C1)C1=CC=C(CI)C(CI)=C1  
 COC1=C(OC)C=C(C=C1)C1N([C@@H]2CCCC[C@H]2NC(=O)C(CC2=CN=C3=C2C=CC=C3)NC1=O)C(=O)C1=CC=C(C  
 C=C1)B(O)O)[N+][[O-]]=O  
 COC1=CC2=C(CCCC2N(CCCNC(=O)C(CC(C)C)NC2=O)C(=O)C2=CC3=C(O2)C=CC=C3)C=C1  
 COC1=CC=C(C=C1)C1CC(=O)N[C@@H]2CCCC[C@H]2N(C(=O)C(C)CI)C(C)(CC2=CC=CC=C2OC)C(=O)N1  
 CCOC(=O)C(CI)C1(C)N(CC(O)CNC(=O)CC(CC(C)C)NC1=O)C(=O)C(OC)C1=CC=CC=C1  
 COC1=CC=C(C=C1)C1CC(=O)NCC(C)(C)CN(C(=O)CCC2=CC=C3OCOC3=C2)C(CO)(C2=CC=CC=C2)C(=O)N1  
 [H]C1(N(CCCNC(=O)CC(CC(C)C)NC1=O)C(=O)C1=CC=C(OC)C=C1)C1=CC=CS1  
 [H]C1(N(CCCCCCCCCCNC(=O)C(NC1=O)C(C)C)C(=O)CC1=CC=CC=C1[N+][[O-]]=O)C1=CC=CO1

CCOC(=O)C1CCCC11N(CCCNC(=O)C(CC(C)C)NC1=O)C(=O)C1=CC2=C(N1)C=CC(C1)=C2  
 [H]C1(N(CCCCCCCCCCCCNC(=O)C(CC2=CC=CC=C2)NC1=O)C(=O)C1=C(C1)C=CC=C1)C1=CC(=CC=C1)[N+](O)=O  
 CC(=O)N1CCCCNC(=O)CCCNC(=O)CCC(O)=O)C1C1=CNC2=C1C=C(C1)C=C2  
 OC1=C(C=CC=C1)C1N(CCCCCCCCCCCCNC(=O)CCCNC1=O)C(=O)C1=CC(F)=CC=C1  
 [H]C1(N(CCCNC(=O)C(NC1=O)C(C)C)C(=O)[C@H](C)C1)C1=CC=CC(C1)=C1  
 COC1=CC=CC(C=C(C(=O)N)2CC(O)CNC(=O)C(CC3=CNC4=C3C=CC=C4)NC(=O)C2C2=C(C)C=CS2)=C1OC  
 [H][C@@]12CC[C@H]([C@H](C)CCC(=O)N3[C@@H]4CCCC[C@H]4NC(=O)CCCNC(=O)C3CC3=CC=CC=C3)[C@  
 @]1(C)C(=O)C[C@@]1([H])[C@@]2([H])C(=O)CC2CC(=O)CC[C@]12C  
 [H]C1(N(CCNC(=O)C(CC(C)C)NC1=O)C(=O)C(C)OC(=O)NC1=CC=CC=C1)C1=C(O)C=CC(Br)=C1  
 CC(=C)C(=O)N1CCCCNC(=O)CNC(=O)C11CCOC2=CC=CC=C12  
 [H]C1(N(CCNC(=O)CC(CC(C)C)NC1=O)C(=O)CBr)C1=CC=CC(O)=C1  
 CC(C)(C)OC(=O)N[C@@H](CC1=CC=CC=C1)C(=O)N1CCCCCCCCCCCNC(=O)CCNC(=O)C1C1=C(C=C(Br)C=C1)[  
 N+](O)=O  
 OC1CNC(=O)CNC(=O)C(COCC2=CC=CC=C2)N(C1)C(=O)CC1=CC=C(I)C=C1  
 CC1=C(C=CC=C1C(=O)N1CCSCCNC(=O)CNC(=O)C1C1=C(N)N=CN=C1)[N+](O)=O  
 COC1=CC=C(CC2(C)N([C@@H]3CCCC[C@H]3NC(=O)C(CC3=CNC4=C3C=CC=C4)NC2=O)C(=O)CCC(=O)C2=CC=  
 C(F)C=C2)C=C1  
 CC(C)CC1CC(=O)NCCSCCN(C(=O)C2=CC3=C(N2)C=CC=C3)C(C)(CC(=O)OCC2=CC=CC=C2)C(=O)N1  
 COC1=C(O)C(=CC=C1)C(=O)N1CCCCCCCCCCCNC(=O)CCCCNC(=O)C1CC1=CC=CC=C1  
 O=C(CC1=CNC2=C1C=CC=C2)N1CCCCNC(=O)CCCCNC(=O)C11CCCC=C1  
 CCC(C)C(=O)N1CCNC(=O)C(CC2=CC=CC=C2)NC(=O)C1C1CC(OC)OC1OC  
 COC1=CC=C(C=C1)C1CC(=O)NCCCCN(C(=O)C2=CC(OC)=CC=C2OC)C(CC(O)=O)(CC(O)=O)C(=O)N1  
 FC(F)(F)C1=CC=C(C=C1)C1N(CCCCCNC(=O)CCCCNC1=O)C(=O)C1=CNC2=C1C=CC=C2  
 COC(=O)CC1(CCl)N(C(C(NC(=O)CC(CC(C)C)NC1=O)C1=CC=CC=C1)C1=CC=CC=C1)C(=O)C1=C(O)C=CC=C1O  
 O=C(NCCCC(=O)N1CCNC(=O)CCCCNC(=O)C11CCN(CCC2=CC=CC=C2)CC1)OCC1=CC=CC=C1  
 CC(C)C1NC(=O)C(C)(N(CCCCCNC1=O)C(=O)CCCC1=CC=CC=C1)C1=CC=C(C1)C(C1)=C1C1  
 CCC1(N(CC(O)CNC(=O)C(CC2=CNC3=C2C=CC=C3)NC1=O)C(=O)C(O)=O)C1=C(O)C=CC=C1  
 NC1=C(C=NC=N1)C1N(CCCCCNC(=O)CNC1=O)C(=O)CC1=CC=C(O)C=C1  
 CC1=C(SC=C1)C1N([C@@H]2CCCC[C@H]2NC(=O)CC(NC1=O)C1=CC=C(C1)C=C1)C(=O)C1=CC2=C(N1)C=CC=C2  
 COC1=CC=C(C=C1)C1CC(=O)NC(C(N(C2=C(C=CC=C2)C(F)(F)F)C(=O)N1)C(=O)C1=CN=C2C=C(C1)C=CC2=C1O)  
 C1=CC=CC=C1)C1=CC=CC=C1  
 CC(C)C1NC(=O)C(N(CCNC1=O)C(=O)\C=C\C1=CC=CS1)C1=CC(OC2=CC=CC=C2)=CC=C1  
 [H]C1(N(CCCCCCCCNC(=O)C(CC(C)C)NC1=O)C(=O)C1=C(OC)C=CC=C1OC)C1=C(Br)C=CC(OC)=C1

CC(=C)C1CC=C(C)C2(C1)N(CCCNC(=O)C(CC1=CC=CC=C1)NC2=O)C(=O)C1=CC=C(O)C=C1O  
 OC(=O)CC1(CC(O)=O)N([C@@H]2CCCC[C@H]2NC(=O)CCCNC1=O)C(=O)C1=CC2=C(N1)C=CC=C2  
 CC1=CC=C(C=C1)C1N(CCOCCOCCNC(=O)CCCNC1=O)C(=O)C1=CSC=C1  
 [H]C1(N(CC(C)C)C)CNC(=O)CCCCNC1=O)C(=O)C1=CC=CC(OC)=C1O)C1=CC=CO1  
 CCC1(N(CC(C)C)C)CNC(=O)CNC1=O)C(=O)CCCC=C)C1=C(O)C=CC=C1  
 CC1=NC=C(N=C1)C(=O)N1[C@@H]2CCCC[C@H]2NC(=O)CNC(=O)C1C1=CN(C(=O)OC(C)C)C2=C1C=CC=C2  
 [H][C@@]12CC[C@H]([C@H](C)CCC(=O)N3CCCCNC(=O)CCNC(=O)C3C3=C(C1)C(C)=CC=C3F)[C@@]1(C)C(=O)C  
 [C@@]1([H])[C@@]2([H])C(=O)CC2CC(=O)CC[C@]12C  
 CC1(CCC=C)N(CCCCCCNC(=O)CC(NC1=O)C1=CC=C(C1)C=C1)C(=O)CCC1=CC=C2OCOC2=C1  
 COC1=CC=C(C=C1)C(=O)N1CCCCCCCCNC(=O)CCCCNC(=O)C1CC1  
 [H]C1(N(CCNC(=O)CCNC1=O)C(=O)C1=C(C)C=C(C)C=C1)C(C)=C  
 CC(C)C1NC(=O)C(N(CCCNC1=O)C(=O)C1=CC=C(C)C=C1)C1=CC=C(OC(F)(F)F)C=C1  
 CC(C)C1NC(=O)C(CC(O)=O)(CC(O)=O)N(CCCCNC1=O)C(=O)C1CCC=CC1  
 [H]C1(N(CC(O)C)CNC(=O)CC(NC1=O)C1=CC=C(C1)C=C1)C(=O)C1=CC2=C(N1)C=CC(O)=C2)C1=CC=C(O)C=C1  
 CCCC(=O)N1CCNC(=O)CC(NC(=O)C1(C)CCC=C)C1=CC=C(C1)C=C1  
 [H]C1(N(C(C)NC(=O)CCCNC1=O)C1=CC=CC=C1)C1=CC=CC=C1)C(=O)C(O)C1=CC=CC=C1)C1=CC2=C(OCO2)C=C  
 C1  
 CC(C)CC1NC(=O)C2(CC3CCC2(C(O)=O)C3(C)C)N(CC(C)C)CNC1=O)C(=O)C1(CC1)NC(=O)OC(C)C)C  
 CCC\C=C\C(=O)N1CC(C)C)CNC(=O)CCNC(=O)C1(CC(=O)OCC)CC(=O)OCC  
 COC1=CC=C(C(=O)N2CCCCNC(=O)CCNC(=O)C22CCOC3=CC=CC=C23)C(OC)=C1OC  
 OC1CNC(=O)C(CC2=CC=CC=C2)NC(=O)C(CC2=CC=CC=C2)(CC2=CC=CC=C2)N(C1)C(=O)CCCC=C  
 O=C(C#CC1=CC=CC=C1)N1CCCCCNC(=O)CC(NC(=O)C1CC1=CC=CC=C1)C1=CC=CC=C1  
 CCOC1=CC2(CCC1)N(C(C)NC(=O)C(CC1=CC=CC=C1)NC2=O)C1=CC=CC=C1)C1=CC=CC=C1)C(=O)CCC1=CC=C(O)C=C1  
 [H][C@@]12CC[C@H]([C@H](C)CCC(=O)N3CCCCCCCCNC(=O)C(CC(C)C)NC(=O)C3C3=CNC4=C3C=CC(C1)=C4)[  
 C@@]1(C)C(=O)C[C@@]1([H])[C@@]2([H])C(=O)CC2CC(=O)CC[C@]12C  
 CCC\C=C\C(=O)N1CCNC(=O)C(CC2=CC=CC=C2)NC(=O)C1C1=CC(NC(=O)OC(C)C)C=CC=C1  
 CC1(CCI)N([C@@H]2CCCC[C@H]2NC(=O)CNC1=O)C(=O)CCCCCCCC=C  
 CCOC(=O)C(CC)C1(C)N(CCSCCNC(=O)CCCNC1=O)C(=O)\C=C\C1=C(OC)C(OC)=CC=C1  
 COC1=CC=C(CC2(C)N(CCCCCNC(=O)CCCCNC2=O)C(=O)C2=C(O)C=CC=C2OC)C=C1  
 CC(C)C1NC(=O)C(CNC(=O)OC(C)C)N(CCCCCCNC1=O)C(=O)C(CO)C1=CC=CC=C1  
 CC[O]=C1NC(CC(=O)NCCCCCN(C(=O)\C=C\C(O)=O)C11CC2=CC=CC=C2C1)C1=CC=C(C1)C=C1  
 [H]C1(N(CCCCCNC(=O)CC(NC1=O)C1=CC=CC=C1)C(=O)C1=CC=CC(OC)=C1OC)C1=CC(OC)=CC=C1OC



[H][C@@]12CC[C@H]([C@H](C)CCC(=O)N3CCCCCCCCCNC(=O)CC(NC(=O)C3([H])C3=C(OC)C=CC(Br)=C3)C3=CC=C(OC)C=C3)[C@@]1(C)CC[C@@]1([H])[C@@]2([H])CC[C@@]2([H])C[C@H](O)CC[C@@]12C

CC1(C)OB(OC1(C)C)C1=CC=C(C=C1)C1N(C(C(NC(=O)C(CC2=CNC3=C2C=CC=C3)NC1=O)C1=CC=CC=C1)C1=CC=CC=C1)C(=O)C(O)C1=CC=CC=C1

[H]C1(C=C)N(CCCCCNC(=O)CC(CC(C)C)NC1=O)C(=O)C1=C(O)C=CC=C1OC

CC(C)CC1NC(=O)C(N(CCCCCCCCCCNC1=O)C(=O)CC1=CC=C(C=C1)[N+][([O-])=O)C1=C(C=CC=C1)[N+][([O-])=O]

CC1(N(CC(O)CNC(=O)C(CC2=CC=CC=C2)NC1=O)C(=O)C=C\C1=CC(=CC=C1)C(F)(F)F)C1=C(O)C=CC(Br)=C1

[H]C1(N(CCCCCCCCCCNC(=O)CC(NC1=O)C1=CC=C(OC)C=C1)C(=O)C1=CC=C(Br)O1)C1=C(Br)C=CC(OC)=C1O

COC1=C(O)C=C(CCCC(=O)N2C(C(NC(=O)C(CC3=CNC4=C3C=CC=C4)NC(=O)C22CCC(CC3=CC=CC=C3)C3=CC=C(C=C23)C2=CC=CC=C2)C2=CC=CC=C2)C=C1

COC1=CC(=CC(OC)=C1OC)C(=O)N1C(C(NC(=O)CCCCNC(=O)C1C1=CN(C(=O)OC(C)C)C)C2=C1C=CC=C2)C1=C(C=CC=C1)C1=CC=CC=C1

CCC(C)C(=O)N1CC(C)C)CNC(=O)C(CC(C)C)NC(=O)C1C1=CN=C2C=CC=CC2=C1

CC1(C)CNC(=O)CCNC(=O)C(N(C1)C(=O)CCC1=CC=CC(OC(=O)C2=CC=CC=C2)=C1)C1=CC(=CC=C1)C#N

FC(F)F)C1(N(CCCCCNC(=O)CCNC1=O)C(=O)CNC(=O)OCC1=CC=CC=C1)C(F)(F)F

CCOC(=O)C(CC)C1(C)N(CCCCCNC(=O)CC(NC1=O)C1=CC=C(OC)C=C1)C(=O)C1=CC(C)=CC(C)=C1

CC(C)=CC1(C)N(CCNC(=O)C(CC2=CNC3=C2C=CC=C3)NC1=O)C(=O)CCNC(=O)OC(C)C

CC1(CC2=CC=CC=C2)N(CCCNC(=O)CCNC1=O)C(=O)C1=CC2=C(N1)C=CC(Cl)=C2

C1C1=CC=C(C=C1)C1CC(=O)NCCN(C(C2=CC=CN=C2)C(=O)N1)C(=O)C=C\C1=CC=CS1

OC(=O)C1=CC=C(C=C1)C1N(C(C(NC(=O)CCCCNC1=O)C1=CC=CC=C1)C1=CC=CC=C1)C(=O)C1=C(Cl)C=CC=C1

[H]C1(CCCCC)N([C@@H]2CCCC[C@H]2NC(=O)CCCCNC1=O)C(=O)C=C\C1=CC=C(OC)C=C1

CCOC(=O)C1CCCC1N(C(C(NC(=O)CCNC1=O)C1=CC=CC=C1)C1=CC=CC=C1)C(=O)CC=C

COC(=O)CCCC1N(CCCCCCCCCCNC(=O)CCCCNC1=O)C(=O)CC1=CN=CC=C1

[H]C1(C(OC)OC)N(CCCCCNC(=O)C(CC(C)C)NC1=O)C(=O)C1=CC=C(OC)C=C1[N+][([O-])=O]

FC1=CC=CC(Cl)=C1C1N(CCCCCNC(=O)CCNC1=O)C(=O)CCC1=CC=CC=C1

CC1(C)CNC(=O)CCCCNC(=O)C(N(C1)C(=O)CC1=CC(Cl)=CC=C1)C1=CC(=CC=C1)C#N

CCC(=O)C1(CC)N(CCCCCCCCCCNC(=O)C(CC(C)C)NC1=O)C(=O)C1=CC=C2C=CC=CC2=N1

CC(C)C1NC(=O)C(C2CCCC2)N(CCCNC1=O)C(=O)C(O)C1=CC=CC=C1

CC(C)C1NC(=O)C(N(CCCCCNC1=O)C(=O)CC1=CC=C2C=CC=CC2=C1)C(C)C

COC1=CC=C(C=C1)C1CC(=O)NCC(C)C)CN(C(=O)C2=C(Cl)C3=C(S2)C=CC=C3)C2(CCC=C2)C(=O)N1

CC(C)CC1CC(=O)NCCCN(C(C=C(C)CCC=C(C)C)C(=O)N1)C(=O)CC1=CC(O)=C(OC2=CC=CC=C2)C=C1

COC(=O)CCC1(C)N(CCCNC(=O)C(CC2=CNC3=C2C=CC=C3)NC1=O)C(=O)CC1=CC=C2OCOC2=C1

[H]C1(N(CCCCCNC(=O)C(CC2=CNC3=C2C=CC=C3)NC1=O)C(=O)C1=CC=CC=C1)C1=C(Br)C=CC(OC)=C1

[H]C1(N(C(C(NC(=O)C(CC2=CNC3=C2C=CC=C3)NC1=O)C1=CC=CC=C1)C1=CC=CC=C1)C(=O)C1=CN=C(C)C=N1)  
 C1=CC=CC(C1)=C1C1  
 CCC1(N(C(C(NC(=O)CCCCNC1=O)C1=CC=CC=C1)C1=CC=CC=C1)C(=O)CC1=CC=C(O)C(C1)=C1)C1=CC=CS1  
 [H]C1(N(CCCCCNC(=O)CC(NC1=O)C1=CC=C(OC)C=C1)C(=O)\C=C\C1=CC=C(OC)C=C1)C1=C(OC)C=CC=C1  
 CC[O]=C1NCCCCC(=O)NCCN(C(=O)\C=C\C(O)=O)C11CCCC(C)=C1\C=C/S  
 COC1=C(OC)C(=CC=C1)C(=O)N1CCCCCNC(=O)CCCNC(=O)C1(C)CC(=O)OCC1=CC=CC=C1  
 [O-]  
 ][N+](=O)C1=CC=CC=C1CC(=O)N1CCNC(=O)C(CC2=CNC3=C2C=CC=C3)NC(=O)C1C1=CC=C(C=C1)C1=CC=CC=C1  
 [O-][N+](=O)C1=CC=C(C=C1)C1N(CCCCCCCCCNC(=O)CNC1=O)C(=O)CCCC#C  
 CC(C)CC1CC(=O)NC(C(N(C(C2=CC(F)=CC=C2)C(=O)N1)C(=O)CC1=CC=C(Br)C=C1)C1=CC=CC=C1)C1=CC=CC=C1  
 1  
 [H]C(=O)CCCC1([H])N(CCCCCNC(=O)C(CC2=CC=CC=C2)NC1=O)C(=O)C1=C(OC)C=CC(=C1)S(C1)(=O)=O  
 CCOC(=O)C(CC)C1(C)N(CC(C)C)CNC(=O)C(CC2=CNC3=C2C=CC=C3)NC1=O)C(=O)CC1=CNC2=C1C=CC=C2  
 CCC(C)C(=O)N1CCCCCCCCNC(=O)CNC(=O)C1C1=C(C=CC=C1)C(F)(F)F  
 OC1=C(C=C(C=C1[N+](O-))=O)[N+](O-)=O)N1CCSCCNC(=O)CCCNC(=O)C1(CCl)CC1  
 CCOC(=O)CC1(C(C)C)N(CCCNC(=O)CCCCCNC1=O)C(=O)C1=CC=CC=N1  
 CC(C)C1NC(=O)C(C(C)CC2=CC=C(C=C2)C(C)C)N(CCOCCOCCNC1=O)C(=O)C1=CC=C(O)C=C1O  
 [H]C1(N(C(CSCCNC(=O)CC(CC(C)C)NC1=O)C(=O)C1=CC2=C(N1)C=CC=C2)C1=CC=C(OC)C(O)=C1  
 COC1=CC2=C(OCC(C)C22N(C(C(NC(=O)C(CC3=CC=CC=C3)NC2=O)C2=CC=CC=C2)C2=CC=CC=C2)C(=O)C2=CN  
 =C3C=C(C1)C=CC3=C2O)C=C1  
 BrCCC1=CC=C(C=C1)C1N([C@@H]2CCCC[C@H]2NC(=O)CCCCCNC1=O)C(=O)\C=C\C1=CC=CS1  
 COC1=CC=C(C=C1)C1CC(=O)NCCSCCNC(=O)[C@@H](NC(=O)OC(C)C)[C@@H](C)OCC2=CC=CC=C2)C(CCl)(  
 C2=CC=CC=C2)C(=O)N1  
 CCOC(=O)C1N([C@@H]2CCCC[C@H]2NC(=O)CC(NC1=O)C1=CC=CC=C1)C(=O)CC1=CC=C(OC)C=C1  
 C\C=C(/C)C1N(CCCCCCCCCNC(=O)CC(NC1=O)C1=CC=CC=C1)C(=O)C1=C(S)C=CC=C1  
 [H]C1(N(CCCCCNC(=O)C(CC(C)C)NC1=O)C(=O)CC#N)C1=CC=CC(OC)=C1O  
 [H]C1(N(CCCCCCCCCNC(=O)C(NC1=O)C(C)C)C(=O)CCO)C1=CC=C(Br)C=C1  
 CCOC(=O)C1CCCCC11N(CCCNC(=O)CCCCCNC1=O)C(=O)C1=C(O)C=CC(O)=C1  
 CC(C)CC1CC(=O)NCCCCCCCCN(C(C2=CC=CN2)C(=O)N1)C(=O)C1=CN=C2C=C(C1)C=CC2=C1O  
 O=C(C=C\C1=CC=CS1)N1CCNC(=O)CNC(=O)C1C1=C2C=CC=CC2=CC=C1  
 COC1=C(OCC2=CC=CC=C2)C=C(CC(=O)N2CCCCCCCCCCCCCNC(=O)C(CC3=CC=CC=C3)NC(=O)C2(C)CC1)C=C1  
 CC(C)C1N(CCCNC(=O)CCCNC1=O)C(=O)C(C)C  
 CC(C)[C@H](NC(=O)OC(C)C)C(=O)N1CCCCCCCCCCCCCNC(=O)CC(NC(=O)C1C1=CC=C2C=NNC2=C1)C1=CC=C(C  
 )C=C1

CCCCCCCCCCCCCCCCCC(=O)N1CCCCNC(=O)CC(CC(C)C)NC(=O)C11CCC(CC1)C1=CC=CC=C1  
 CC[C@H](C)[C@H](NC(=O)OC(C)C)C(=O)N1CCOCCOCCNC(=O)CCCCNC(=O)C1C1=CC(OC)=C(OCC2=CC=C  
 C=C2)C=C1  
 CCCCCCCCCCCCCCCCCC(=O)N1CCCCCCCCCCCCNC(=O)CNC(=O)C1C1=CC=C(C=C1)[N+][O-]=O  
 COC1=CC(OC)=C(OC)C=C1C(=O)N1CC(C)C)CNC(=O)CCCNC(=O)C1C1=CNC2=C1C=CC(CI)=C2  
 CC(C)C1NC(=O)C(C(C)C)N(C(C(NC1=O)C1=CC=CC=C1)C1=CC=CC=C1)C(=O)CCCC#C  
 [H][C@@]12CC[C@H]([C@H](C)CCC(=O)N3CCCCCCCCCCCCNC(=O)CC(NC(=O)C33CCC4=C3C=CC(OC)=C4)C3=CC=CC=C3)[C@@]1(C)CC[C@@]1([H])[C@@]2([H])CC[C@]2([H])C[C@H](O)CC[C@]12C  
 [H][C@@]12CC[C@H]([C@H](C)CCC(=O)N3CC(C)C)CNC(=O)C(CC4=CNC5=C4C=CC=C5)NC(=O)C3C3=CC(NC(=O)OC(C)C)C=CC=C3)[C@@]1(C)C(=O)C[C@@]1([H])[C@@]2([H])C(=O)CC2CC(=O)CC[C@]12C  
 CC(OC(=O)NC1=CC=CC=C1)C(=O)N1CCCCCCCCNC(=O)CC(NC(=O)C1(C)C1=C(O)C=CC(Br)=C1)C1=CC=CC=C1  
 CC(C)C1=CC=C(C=C1)C1N(CCCCCNC(=O)CC(NC1=O)C1=CC=C(CI)C=C1)C(=O)C(C)=C  
 COC1=C(O)C=CC(=C1)C(O)C(=O)N1CCCCNC(=O)C(CC2=CC=CC=C2)NC(=O)C1C1=C(C=CC(CI)=C1)[N+][O-]=O  
 C[C@H](Cl)C(=O)N1CCCCNC(=O)CCCCNC(=O)C1C1=C(C=CC=C1)B1OC(C)C(C)C(O)  
 CC(C)C(OC(=O)N[C@@H](COCC1=CC=CC=C1)C(=O)N1CCCCCCCCNC(=O)C(CC2=CNC3=C2C=CC=C3)NC(=O)C1C1=C(F)C(CI)=CC=C1F  
 OC1=CC2=C(C=C1)C=C(C=C2)C(=O)N1CCCCCCCCNC(=O)CC(NC(=O)C11CCOC2=CC=CC=C12)C1=CC=CC=C1  
 CC1(CCCCC1)C(=O)N1C(C(NC(=O)CC(NC(=O)C1C1=C(CI)C=CC=C1C1)C1=CC=CC=C1)C1=CC=CC=C1)C1=CC=CC=C1  
 CCC1(N(C(C)C)C)CNC(=O)C(NC1=O)C(C)C(=O)C1=CC=C(C)S1)C1=CC=CS1  
 [Cl-].CCC(=O)C1(CC)N(CCCCCCCCCNC(=O)CNC1=O)C(=O)CC1=C[NH2+]C=N1  
 [H]C1(C(O)CO)N(C(C(NC(=O)CC(CC(C)C)NC1=O)C1=CC=CC=C1)C1=CC=CC=C1)C(=O)C1=CC=C(O)C=C1O  
 [H]C1(N(C(C)C)C)CNC(=O)CC(NC1=O)C1=CC=CC=C1)C(=O)C1=CC=C(C)C=C1)C1=CC(OC)=CC=C1  
 OC(=O)COC1=CC=C(C=C1)C1N(CCCNC(=O)CCCCNC1=O)C(=O)C1=CC(O)=C2C=CC=CC2=C1O  
 COC1=CC=CC2=C1C1(CC2)N(CCCCCNC(=O)C(CC(C)C)NC1=O)C(=O)CC1=CN=CC=C1  
 [H]C(=O)C1=CC=CC=C1C1([H])N(CCNC(=O)C(CC(C)C)NC1=O)C(=O)C1=CC=C(OC)C=C1[N+][O-]=O  
 [H]C1(N(C(O)C)C)CNC(=O)C(CC2=CC=CC=C2)NC1=O)C(=O)CC1=CC(CI)=CC=C1)C1=CC=C(OC)C=C1  
 CC(=O)N1CC(C)C)CNC(=O)CCCNC(=O)C2CCC(CC2)C(O)=O)C1C1=CC=C2C=NNC2=C1  
 COC1=CC=C(C=C1)C1CC(=O)NCCCCCN(C(=O)CCC(=O)C2=CC=CC=C2)C2(CCC(CC2)C2=CC=CC=C2)C(=O)N1  
 COC1=CC=C(C=C1)C(=O)N1CCCCCCCCCCCCNC(=O)C(CC2=CNC3=C2C=CC=C3)NC(=O)C1(CBr)C1=CC=CC=C1  
 CC1=CC(C)=C(C=C1)C(=O)N1C(C(NC(=O)CCCNC(=O)C1(C1CC1)C1=CC=CC=C1)C1=CC=CC=C1)C1=CC=CC=C1  
 [H]C1(N(CCCCCCCCCNC(=O)CC(CC(C)C)NC1=O)C(=O)CC1)C1=CC=CC(CI)=C1C1  
 CCC1(N(CCNC(=O)CNC1=O)C(=O)CCOCC1=CC=CC=C1)C1=CC=CS1  
 [H]C1(N(CCCCCCCCCNC(=O)CCCCNC1=O)C(=O)C=C\C1=CC(=CC=C1)C(F)(F)F)C(O)=O

[H][C@@]12CC[C@H]([C@H](C)CCC(=O)N3CCCCCCCCNC(=O)C(NC(=O)C3C3=CC(=CC=C3)C#N)C(C)C)[C@@]1  
 (C)CC[C@@]1([H])[C@@]2([H])CC[C@]2([H])C[C@H](O)CC[C@]12C  
 OC(C(=O)N1CCCCCNC(=O)CC(NC(=O)C1(C(F)(F)F)C(F)(F)F)C1=CC=C(CI)C=C1)C1=CC=CC=C1  
 [H]C1(N(C(C(NC(=O)C(CC2=CC=CC=C2)NC1=O)C1=CC=CC=C1)C1=CC=CC=C1)C(=O)CC1CCC=C1)C1=C(Br)C=C  
 C(OC)=C1  
 OC(=O)C1=CC=C(C=C1)C1N([C@@H]2CCCC[C@H]2NC(=O)CCCCCNC1=O)C(=O)CC1=CC=C(C=C1)[N+][[O-]]=O  
 COC1=CC=CC2=C1CCCC21N(CCCCCCCCCCNC(=O)C(CC2=CNC3=C2C=CC=C3)NC1=O)C(=O)C1=CC=C(F)C(=C1)  
 [N+][[O-]]=O  
 CC1=CC(C)=C(C=C1)C(=O)N1CCCCCNC(=O)C(CC2=CNC3=C2C=CC=C3)NC(=O)C1(CCCC1)C1=CC=C(F)C=C1  
 CCC(C)C(=O)N1CCCCCNC(=O)C(CC2=CNC3=C2C=CC=C3)NC(=O)C1(C)CCC=C  
 COC(C(=O)N1CCCCCNC(=O)CC(CC(C)C)NC(=O)C1C1=CC=C(C)C=C1)(C1=CC=CC=C1)C(F)(F)F  
 [H]C1(N(CCCCCCNC(=O)CC(NC1=O)C1=CC=C(OC)C=C1)C(=O)C1=CNC2=C1C=CC=C2)C1=CC=CO1  
 COC1=CC=C(C(=O)N2CCNC(=O)CCCCCNC(=O)C2C2=C3C=CC=CC3=CC=C2)C(=C1)[N+][[O-]]=O  
 [H]C1(N(CCSCCNC(=O)CC(NC1=O)C1=CC=CC=C1)C(=O)CCCC#C)C1=C(Br)C=CC(OC)=C1  
 CCCCCC(=O)N1CC(O)CNC(=O)CCCNC(=O)C1(C)C=O  
 CC1CCC2=CC=CC=C2C11N(CCCCCCNC(=O)CCCCCNC1=O)C(=O)C1=CC2=C(NC=N2)C=C1  
 [H]C1(\C=C\C)N(CCOCCOCCNC(=O)C(NC1=O)C(C)C)C(=O)CC1CCCCC1  
 C\C=C(/C)C1N(CC(C)C)CNC(=O)CCCNC1=O)C(=O)[C@H](COCC1=CC=CC=C1)NC(=O)OC(C)C)C  
 COC1=CC=C(C=C1)C1CC(=O)NCCCCCN(C(=O)CBr)C(C)(C2=CC=C(CI)C=C2)C(=O)N1  
 SC1=C(C=CC=C1)C(=O)N1[C@@H]2CCCC[C@H]2NC(=O)CCCNC(=O)C1C1=CNC2=C1C=CC(CI)=C2  
 CC(C)C1NC(=O)C(C)(CC2=CC=CC=C2)N(CCCCCCNC1=O)C(=O)C1CCCCC1  
 CC(C)CC1NC(=O)C(N(CCCCCCCCCCCCCCNC1=O)C(=O)C1=C(O)C(=CC(=C1)[N+][[O-]]=O)[N+][[O-]  
 ])=O)C1=CC(OC2=CC=CC=C2)=CC=C1  
 CC1(N(CCCCCCCCCCCCCCNC(=O)CCNC1=O)C(=O)CC1CCC=C1)C1=CC=C(CI)C=C1  
 COC(=O)CCC1(C)N(CC(O)CNC(=O)CNC1=O)C(=O)CC1=CC=C(C=C1)[N+][[O-]]=O  
 CCOC1=CC2(CCC1)N(C(C(NC(=O)C(CC(C)C)NC2=O)C1=CC=CC=C1)C1=CC=CC=C1)C(=O)C1=CC(F)=CC=C1  
 CCC(=O)N1CCCNC(=O)C(CC(C)C)NC(=O)C1(CC)C1=CC=C(CI)C=C1  
 C\C=C(/C)C1N(CCCCCCNC(=O)C(NC1=O)C(C)C)C(=O)CCCC=C  
 COC1=CC=CC(\C=C\C(=O)N2CC(O)CNC(=O)C(CC3=CNC4=C3C=CC=C4)NC(=O)C2(C)C=O)=C1OC  
 [H]C1(N(CCOCCOCCNC(=O)C(NC1=O)C(C)C)C(=O)C1=CC=C(C=C1)N(C)C)C1=CC=CS1  
 CC1=C(C=CC=C1C(=O)N1CCCCCCCCCCCCCNC(=O)C(CC2=CC=CC=C2)NC(=O)C1CNC(=O)OC(C)C)C)[N+][[O-]  
 ]=O  
 FC1=CC=C(C=C1)C(=O)CCC(=O)N1CCCNC(=O)CCCNC(=O)C1C1=CC(Br)=CC=C1  
 CCC1(CC)N(CCCCCCNC(=O)C(NC1=O)C(C)C)C(=O)[C@H](C)NC(=O)OC(C)C)C

CC(=O)N1CCCCCNC(=O)CCNC(=O)C2CCC(CC2)C(O)=O)C1CCI  
 CC1(C=O)N(CCOCCOCCNC(=O)C(CC2=CNC3=C2C=CC=C3)NC1=O)C(=O)C1=C(O)C=CC=C1O  
 CC(C)C1NC(=O)C(N(CC(C)(C)CNC1=O)C(=O)CCCNC(=O)OCC1=CC=CC=C1)C1=CC=C(C=C1)C1=CC=CC=C1  
 O=C(CCCC1=CC=CC=C1)N1CCCCCCCCCNC(=O)CNC(=O)C11CCN(CCC2=CC=CC=C2)CC1  
 CC(C)CC1CC(=O)NC(C(N(C(=O)C(O)=O)C2(CCC3=C2C(O)=CC=C3)C(=O)N1)C1=CC=CC=C1)C1=CC=CC=C1  
 COC1=C(C(=O)N2CC(C)(C)CNC(=O)CC(NC(=O)C2C2CCCC2)C2=CC=CC=C2)C(Br)=CC=C1  
 COC(C(=O)N1CCCNC(=O)CCCCNC(=O)C1C1=CC=CC(=C1)B1OC(C)(C)C(C)(C)O1)(C1=CC=CC=C1)C(F)(F)F  
 CC(C)C1NC(=O)C2(C3CC4CC(C3)CC2C4)N(CCCCCNC1=O)C(=O)C1=CNC2=C1C=CC=C2  
 [H]C1(N(CCSCCNC(=O)C(NC1=O)C(C)C)C(=O)C1CCCC1)C1=CC=C(O)C=C1  
 CCC(=O)N1C(C(NC(=O)C(CC2=CC=CC=C2)NC(=O)C1(C)CCC=C)C1=CC=CC=C1)C1=CC=CC=C1  
 O=C(CC1=CC=C2OCOC2=C1)N1[C@@H]2CCCC[C@H]2NC(=O)CCCCCNC(=O)C1C1=CN=C2C=CC=CC2=C1  
 OC1=C(O)C(=CC=C1)C(=O)N1CCCCCCCCCNC(=O)C(CC2=CNC3=C2C=CC=C3)NC(=O)C1C1=CC(=CC=C1)C#N  
 CC(C)(C)OC(=O)N1CCC2(CC1)N(CCCCCCNC(=O)CNC2=O)C(=O)C1=C(O)C=CC=C1  
 CC1=CC(=CC=C1Br)C(=O)N1CC(O)CNC(=O)CCCCNC(=O)C1(C1CC1)C1=CC=CC=C1  
 [H][C@]12CS[C@@H](CCCC(=O)N3CCCCCNC(=O)CCCCCNC(=O)C3(C)C)[C@@]1([H])NC(=O)N2  
 CCC1(CC)N(CCCCCCCCCCNC(=O)C(CC2=CC=CC=C2)NC1=O)C(=O)C1=CC2=C(O1)C=CC=C2  
 [H]C1(\C=C\C2=CC=CC=C2)N([C@@H]2CCCC[C@H]2NC(=O)CCNC1=O)C(=O)C(C)C1  
 CC1(N(CCCCCCNC(=O)CCNC1=O)C(=O)C1=C2C=CC=CC2=CC=C1)C1=C(O)C=CC=C1  
 C1CCCC1(N(CCCCCCNC(=O)CCNC1=O)C(=O)CCC1=CC=CC(OC(=O)C2=CC=CC=C2)=C1)C1=CC=CS1  
 OC1=CC=C(CC(=O)N2CCCCCCCCCNC(=O)CC(NC(=O)C2C2=CC(=C(Br)C=C2)[N+][[O-]]  
 )=O)C2=CC=C(C1)C=C2)C=C1  
 OC1=CC(O)=C(C=C1)C1N(CCCCCCCCCCNC(=O)CCNC1=O)C(=O)C=C\C1=CC(=CC=C1)C(F)(F)F  
 OC1CNC(=O)CNC(=O)C(CCCCCCCC=C)N(C1)C(=O)C1=CC=C(Br)O1  
 CCOC(=O)C1CCC2(CC1)N(CCCCCCNC(=O)C(CC(C)C)NC2=[O]C1CCC(CC1)C(O)=O)C(C)=O  
 OC1CNC(=O)CCCCCNC(=O)C(N(C1)C(=O)CCC(=O)C1=CC=CC=C1)C1=CC2=C(OC2)C=C1[N+][[O-]]=O  
 CC(C)=CC1(C)N(CCCCCCCCCCNC(=O)CCCCCNC1=O)C(=O)C1=C(O)C=CC=C1O  
 CC(C)C1NC(=O)C(N(CCNC1=O)C(=O)CCCNC(=O)OCC1=CC=CC=C1)C1=C(Br)C=CC=C1  
 CC(C)CC1NC(=O)C(C)(N(CCCCCCCCCCNC1=O)C(=O)CCCC1=CC=CC=C1)C1=CC=C(Br)S1  
 [H]C1(N(CCCNC(=O)C(CC2=CC=CC=C2)NC1=O)C(=O)CC1=CC=C(O)C=C1)C1=CC(O)=CC=C1  
 CCC(C)C(=O)N1CCOCCOCCNC(=O)C(CC2=CC=CC=C2)NC(=O)C1C1=C(C=CC=C1)C(O)=O  
 COC(C(=O)N1CCCCCCCCCNC(=O)CCCCCNC(=O)C11CC2=CC=CC=C2C1)(C1=CC=CC=C1)C(F)(F)F  
 [H]C1(N(CCCCCCNC(=O)C(CC(C)C)NC1=O)C(=O)C1=CNC2=C1C=CC=C2)C1=CC=CC=C1

COC1=CC=C(C(=O)N2CCCCNC(=O)CCCNC(=O)C2C2=CC=C(F)C=C2C1)C(=C1)[N+]([O-])=O  
 ClCCCC1(N(CCCCNC(=O)CCCCNC1=O)C(=O)CCCC#C)C1=CC=C(Cl)C=C1  
 CCC1(N(CCCCNC(=O)C(CC2=CC=CC=C2)NC1=O)C(=O)CC1=CC=C(Br)C=C1)C1=CC=C(O)C=C1  
 [H][C@]12CS[C@@H](CCCC(=O)N3CCOCCOCCNC(=O)CCCCNC(=O)C3(C)CCC(=O)OC)[C@@]1([H])NC(=O)N2  
 [H]C1(N(CCCCCCCCNC(=O)CCCCNC1=O)C(=O)C1=C(O)C=C(O)C=C1O)C1=CC(OC)=CC(OC)=C1  
 COC1=C(O)C=CC(=C1)C(O)C(=O)N1CC(C)(C)CNC(=O)CC(CC(C)C)NC(=O)C1CNC(=O)OC(C)(C)C  
 [H]C1(CCC)N(C(C(NC(=O)CCCCNC1=O)C1=CC=CC=C1)C1=CC=CC=C1)C(=O)CC1=CC(OC)=CC(OC)=C1  
 ClCCCC1(N(CCCCNC(=O)CCCCNC1=O)C(=O)CCCB1)C1=CC=CC=C1  
 COC(C(=O)N1CCCNC(=O)CC(NC(=O)C1C1=CC=C(COC(C)=O)O1)C1=CC=C(OC)C=C1)C1=CC=CC=C1  
 [H]C1(N(CCCCCCNC(=O)CC(NC1=O)C1=CC=CC=C1)C(=O)CCC1=CC=C2OCOC2=C1)C1=C(OC)C=CC=C1  
 [H]C1(N(C(C(NC(=O)CC(NC1=O)C1=CC=CC=C1)C1=CC=CC=C1)C1=CC=CC=C1)C(=O)C1=CC=C(OC)C=C1)C1=CS  
 C=C1  
 [H]C1(N(CCCCCCCCNC(=O)C(CC2=CNC3=C2C=CC=C3)NC1=O)C(=O)CC1=CC=CC=C1[N+](O-  
 ))=O)C1=CC=CO1  
 CC(C)[C@H](NC(=O)OC(C)(C)C(=O)N1CCCCNC(=O)C(CC2=CNC3=C2C=CC=C3)NC(=O)C11CCCCCCCCC1  
 COC1CC(C(OC)O1)C1N(C(C(NC(=O)CCCCNC1=O)C1=CC=CC=C1)C1=CC=CC=C1)C(=O)C1=CC2=C(O1)C=CC=C2  
 CCC1(N(CCCNC(=O)C(CC2=CC=CC=C2)NC1=O)C(=O)CCCB1)C1=CC=C(F)C=C1  
 COC1=CC=C(C=C1)C1CC(=O)NCCCCCN(C(C2=CSC3=C2C=CC=C3)C(=O)N1)C(=O)C(C)OC(=O)NC1=CC=CC=C1  
 CCCN1CCC2(CC1)N(CCNC(=O)C(CC1=CNC3=C1C=CC=C3)NC2=O)C(=O)C(C)=C  
 SC1=C(C=CC=C1)C(=O)N1CCNC(=O)CC(NC(=O)C11CCCC1C1)C1=CC=CC=C1  
 COC1=CC=C(C(=O)N2CC(O)CNC(=O)C(NC(=O)C2C2=CC=NC=C2)C(C)C)C(OC)=C1  
 CC1(N(CCCCCCNC(=O)C(CC2=CNC3=C2C=CC=C3)NC1=O)C(=O)C1=CC2=C(N1)C=CC=C2)C1=C(O)C=CC(Br)=C1  
 CC(C)CC1NC(=O)C(C2CC2)N(CCCCCCNC1=O)C(=O)[C@H](CS)NC(C)=O  
 COC1=C(C=C)C(=O)N2CC(O)CNC(=O)CCCCNC(=O)C2(C2=CC=CC=C2)C2=CC=CC=C2)C=CC=C1  
 OCC1(N(CCCCCCCCNC(=O)CCCCNC1=O)C(=O)CC1CCCC1)C1=CC=CC=C1  
 [H]C1(N(CCCCCCNC(=O)CCCCNC1=O)C(=O)CC1=CC(=CC=C1)[N+](O-))=O)C1=CC=CS1  
 OC1CNC(=O)CC(NC(=O)C(N(C1)C(=O)C=C)C1=CC=CO1)C1=CC(Br)=CC=C1)C1=CC=C(Cl)C=C1  
 COC(=O)CCCC1N(CCCNC(=O)CC(NC1=O)C1=CC=C(Cl)C=C1)C(=O)CC1  
 COC1=CC=C(C=C1)C1CC(=O)NCCCCCCCCCCCCN(C(C2=CC(F)=CC=C2)C(=O)N1)C(=O)C1=CC=C(C)C=C1  
 [H]C(=O)CCCC1([H])N(CCCCCCNC(=O)C(CC2=CC=CC=C2)NC1=O)C(=O)C1CCC=CC1  
 [H]C1(N(C(C(NC(=O)CC(CC(C)C)NC1=O)C1=CC=CC=C1)C1=CC=CC=C1)C(=O)C1=CC2=C(N1)C=CC(O)=C2)C1=C  
 C=CS1  
 CCCC(=O)N1CCCCCNC(=O)C(CC2=CC=CC=C2)NC(=O)C1C(C)CC

CC1(C)CNC(=O)C(CC2=CNC3=C2C=CC=C3)NC(=O)C(CCl)(N(C1)C(=O)C1=CC=C2C=CC=CC2=C1)C1=CC=CC=C1  
[H]C(=O)CCCC1([H])N(CC(O)CNC(=O)CCNC1=O)C(=O)\C=C\C1=C(OC)C(OC)=CC=C1  
CC(C)CC1NC(=O)C(N(CCOCCOCCNC1=O)C(=O)[C@H]1O[C@@H](O)[C@H](O)[C@@H](O)[C@@H]1O)C1=CC(O)  
)=C(O)C=C1  
OC1=CC2=C(NC(=C2)C(=O)N2CCCCCCCCCCCCNC(=O)CCNC(=O)C2C2=C(Cl)C(F)=CC=C2F)C=C1  
CCCC(=O)N1CC(O)CNC(=O)CNC(=O)C1C1=C(Cl)C=CC=C1  
CC1(C)CNC(=O)C(CC2=CNC3=C2C=CC=C3)NC(=O)C(N(C1)C(=O)CC1=CC(=C(O)C=C1)[N+](([O-]  
])=O)C1=CC(F)=C(F)C(F)=C1  
CCOC(=O)C1CCCC11N(CCCCNC(=O)CNC1=O)C(=O)[C@@H](NC(=O)OCC1=CC=CC=C1)C(C)C  
COC1=CC(=CC(OC)=C1OC)C1N(C(C(NC(=O)CCCCNC1=O)C1=CC=CC=C1)C1=CC=CC=C1)C(=O)C(Br)C1=CC=CC  
=C1  
CC(C)CC1NC(=O)C(C)(CC(=O)OCC2=CC=CC=C2)N(CC(O)CNC1=O)C(=O)C(C)=C  
OC1CNC(=O)CNC(=O)C2(CCCC2)N(C1)C(=O)C(Br)C1=CC=CC=C1  
CC(=O)N1CCSCCNC(=O)CNC(=[O]C2=CC=C(C=C2)C(O)=O)C1C1CC1  
CC1(C=C)N([C@@H]2CCCC[C@H]2NC(=O)C(CC2=CNC3=C2C=CC=C3)NC1=O)C(=O)C1=C2C=CC=CC2=CC=C1  
CCOC(=O)CC1(C(C)C)N(CCCCNC(=O)CNC1=O)C(=O)C1=CC=C(C)S1  
[H]C1(N(C(C(NC(=O)CC(NC1=O)C1=CC=C(OC)C=C1)C1=CC=CC=C1)C1=CC=CC=C1)C(=O)CCCC1=CC=CC(OC(=O)  
C2=CC=CC=C2)=C1)C1=CC=C(Br)C=C1  
CC(C)C1NC(=O)C(C)C2=CC=C(C=C2)C(C)(C)N(CCNC1=O)C(=O)CNC(=O)OCC1=CC=CC=C1  
[H][C@@]12CC[C@H]([C@H](C)CCC(=O)N3CC(O)CNC(=O)CC(NC(=O)C3([H])C3=CC=C(Br)C=C3)C3=CC=CC=C3)  
[C@@]1(C)CC[C@@]1([H])[C@@]2([H])CC[C@]2([H])C[C@H](O)CC[C@]12C  
COC1=C(OCC2=CC=CC=C2)C=CC(=C1)C1N(CCOCCOCCNC(=O)C(CC2=CC=CC=C2)NC1=O)C(=O)CC1CCC=C1  
COC1=CC=C(\C=C\C(=O)N2CCNC(=O)CCCCNC(=O)C2(C)C2=CC(O)=CC(O)=C2)C=C1  
CC[O]=C1NCCCC(=O)NCCCCCN(C1C1=CC=C(OCC(O)=O)C=C1)C(=O)\C=C\C(O)=O  
COC1=C(OC)C(=CC=C1)C(=O)N1CCCCCCCCCCCCNC(=O)C(CC2=CC=CC=C2)NC(=O)C1(CC#N)C1=CNC2=CC(F)=CC  
=C12  
O=C(CCC1=CC=CC=C1)N1CCCCNC(=O)CCCCNC(=O)C11CCOC2=CC=CC=C12  
[H]C1(N(CCCCNC(=O)C(CC2=CC=CC=C2)NC1=O)C(=O)CC1=CC(Cl)=CC=C1)C1=CC=CC(O)=C1  
CC(C)CC1NC(=O)C(N(CC(C)(C)CNC1=O)C(=O)CCOCC1=CC=CC=C1)C1=CC2=CC=CC=C2S1  
CC1(C)CNC(=O)CCNC(=O)C(C)(N(C1)C(=O)CC12CC3CC(CC(C3)C1)C2)C1=CC=C(Cl)C(Cl)=C1  
[H]C1(N(CC(O)CNC(=O)CC(NC1=O)C1=CC=C(Cl)C=C1)C(=O)CCO)C1=CC=CO1  
[H]C1(N(CCOCCOCCNC(=O)CCCCNC1=O)C(=O)C1=C(O)C=CC(O)=C1)C1=CC=CC(OC)=C1O  
OB(O)C1=CC=C(C=C1)C(=O)N1CCCCCCCCCCCCNC(=O)CNC(=O)C1(CCl)CC1  
CCOC(=O)CC1(CCl)N(CC(C)(C)CNC(=O)CCNC1=O)C(=O)CC1=CC=CC=C1OC  
CC1(N(CCCCCCCCCCCCCNC(=O)CCCCNC1=O)C(=O)CCC=C)C1=CC=CC=C1

CN1C2CCC1CC1(C2)N(CCCCCCCCCCNC(=O)CNC1=O)C(=O)C#CC1=CC=CC=C1  
 OC1=CC=C(CCC(=O)N2CCOCCOCCNC(=O)C(CC3=CC=CC=C3)NC(=O)C2(C2CC2)C2=CC=CC=C2)C=C1  
 [H][C@@]12CC[C@H]([C@H](C)CCC(=O)N3CCCCNC(=O)CCNC(=O)C3C3=CC(Br)=CC=C3)[C@@]1(C)C(=O)C[C@  
 @]1([H])[C@@]2([H])C(=O)CC2CC(=O)CC[C@]12C  
 COC1=CC=C2C=C(C=CC2=C1)C(C)C(=O)N1CCNC(=O)CC(NC(=O)C1C(C)CC1=CC=C(C=C1)C(C)(C)C)C1=CC=C(C1  
 )C=C1  
 COC1=C(OCC2=CC=CC=C2)C=C(CC(=O)N2CCOCCOCCNC(=O)CC(NC(=O)C22CCCC2C1)C2=CC=CC=C2)C=C1  
 OC1=C(C=CC=C1)C1N(CCCCCNC(=O)CC(NC1=O)C1=CC=CC=C1)C(=O)C1=CN=C2C=CC=CC2=N1  
 CCOC(=O)C1CCCC11N([C@@H]2CCCC[C@H]2NC(=O)C(NC1=O)C(C)C)C(=O)[C@H](C)NC(=O)OCC1=CC=CC=  
 C1  
 COC1=CC(=CC(OC)=C1OC)C1N([C@@H]2CCCC[C@H]2NC(=O)CCCCNC1=O)C(=O)C=C  
 [H]C1(N(C(C(NC(=O)C(CC2=CNC3=C2C=CC=C3)NC1=O)C1=CC=CC=C1)C1=CC=CC=C1)C(=O)CC1=CC(=C(O)C=C  
 1)[N+])([O-])=O)C1=CC=C(C1)C=C1  
 CCOC(=O)C1CCC2(CC1)N(C(C(NC(=O)CCCCNC2=O)C1=CC=CC=C1)C1=CC=CC=C1)C(=O)C(C)C  
 CC(C)(C)OC(=O)NC1(CC1)C(=O)N1CC(O)CNC(=O)CNC(=O)C1C1=CC(=C(Br)C=C1)[N+])([O-])=O  
 COC1=CC=CC2=C1CCCC21N(CC(C)(C)CNC(=O)CC(NC1=O)C1=CC=C(C1)C=C1)C(=O)C1=CC2=C(S1)C=CC=C2  
 [H]C1(N(CCCCCCNC(=O)C(CC2=CNC3=C2C=CC=C3)NC1=O)C(=O)C=C)C1=CC=CC(C1)=C1  
 CCOC(=O)CC1(C)N(CCCCCCCCCCNC(=O)CC(NC1=O)C1=CC=C(OC)C=C1)C(=O)C1=C(C1)C=CC=C1  
 CCOC(=O)CC1(CCI)N(CCCCCCNC(=O)C(CC2=CC=CC=C2)NC1=[O]CCC(O)=O)C(C)=O  
 [H]C1(N(CC(O)CNC(=O)CCNC1=O)C(=O)[C@H](NC(=O)OC(C)(C)C)C(C)C)C1=CC=CC(O)=C1  
 FC1=CC=CC(C1)=C1C1N(CCOCOCNC(=O)CCNC1=O)C(=O)CCNC(=O)OCC1=CC=CC=C1  
 OC1CNC(=O)CC(NC(=O)C2(CCCC2)N(C1)C(=O)C1=CC(O)=C2C=CC=CC2=C1O)C1=CC=C(C1)C=C1  
 COC1=CC=C(C=C(C(=O)N2CCCCCCCCCNC(=O)C(CC3=CNC4=C3C=CC=C4)NC(=O)C22CCC(C3=CC=CC=C3)C3=C  
 2C=CC=C3)C=C1  
 CC[O]=C1NC(CC(C)C)C(=O)N[C@@H]2CCCC[C@H]2N(C1C1=C(C=CC=C1)B1OC(C)(C)C(C)(O)1)C(=O)C=C\C(O  
 )=O  
 [H]C1(N(CCSCCNC(=O)CC(NC1=O)C1=CC=CC=C1)C(=O)C1=CC=CC(OC)=C1OC)C1=CC=C(OCC2=CC=CC=C2)C(  
 OC)=C1  
 [H][C@@]12CC[C@H]([C@H](C)CCC(=O)N3CCCCCCCCCNC(=O)CC(NC(=O)C3C3=CC=CC=C3)B3OC(C)(C)C(C  
 )(C)O3)C3=CC=C(C1)C=C3)[C@@]1(C)CC[C@@]1([H])[C@@]2([H])CC[C@@]2([H])C[C@H](O)CC[C@]12C  
 [H]C1(N(CCCCCNC(=O)CC(CC(C)C)NC1=O)C(=O)C(O)C1=CC=CC=C1)C1=CC=C(OCC2=CC=CC=C2)C(OC)=C1  
 [H]C1(N(CCCCCCNC(=O)CC(NC1=O)C1=CC=C(OC)C=C1)C(=O)CC1=CC=C2C=CC=CC2=C1)C1=CC(=CC=C1)[N+](  
 O-)=O  
 OC1=CC=C(Br)C=C1C(=O)N1CCNC(=O)CCCCCNC(=O)C1C1=C(F)C=CC=C1  
 COC1=CC(CC2(C)N(CCCCCCNC(=O)CCNC2=O)C(=O)C2=CC=C(O)C=C2O)=CC=C1  
 ClC1=CC=C(CC(=O)N2CCCCCCCCCNC(=O)C(CC3=CC=CC=C3)NC(=O)C22CCN(CC3=CC=CC=C3)CC2)C=C1



BrCCC(=O)N1CCCCNC(=O)CCCCNC(=O)C1C1=CC(OCC2=CC=CC=C2)=CC=C1  
 COC(=O)CCC1(C)N(CC(O)CNC(=O)CCNC1=O)C(=O)C1=NC2=C(N1)C=CC=C2  
 CCOC(=O)C1N([C@@H]2CCCC[C@H]2NC(=O)CCNC1=O)C(=O)C1=CC=C(Br)O1  
 CCOC(=O)C1CCCC11N(CCCCCNC(=O)C(NC1=[O]C1CCC(CC1)C(O)=O)C(C)C(C)=O  
 CC1(CCl)N(CCCCNC(=O)C(CC2=CC=CC=C2)NC1=O)C(=O)C1=C(O)C=CC=C1O  
 COC1=CC=CC(\C=C\C(=O)N2CC(C)(C)CNC(=O)C(CC(C)C)NC(=O)C2C(C)C)=C1  
 CC[C@H](C)[C@H](NC(=O)OC(C)(C)C(=O)N1CCOCCOCCNC(=O)CCCCNC(=O)C1C1=CC=C(F)C=C1C1  
 OCC1(N(CCCCNC(=O)CNC1=O)C(=O)CCCNC(=O)OCC1=CC=CC=C1)C1=CC=CC=C1  
 [H]C1(C)N(CCCCCCCCCNC(=O)C(CC(C)C)NC1=O)C(=O)C1=CC(O)=C2C=CC=CC2=C1O  
 CC[O]=C1NC(CC(=O)N[C@@H]2CCCC[C@H]2N(C1C1=CC=C(C=C1)B1OC(C)(C)C(C)O1)C(=O)\C=C\C(O)=O)C1  
 =CC=CC=C1  
 [H]C1(N(CCCCCCCCCNC(=O)CC(NC1=O)C1=CC=CC=C1)C(=O)C(OC)(C1=CC=CC=C1)C(F)(F)F)C(O)=O  
 [H]C1(N(CCCCCNC(=O)CC(NC1=O)C1=CC=C(Cl)C=C1)C(=O)COC1=CC=C(Br)C=C1)C1=CC=C(OCC2=CC=CC=C2)  
 C(OC)=C1  
 [H]C1(N(CC(C)(C)CNC(=O)CC(NC1=O)C1=CC=CC=C1)C(=O)C(C)C1=CC(OC)=C(OC)C=C1)C1=CC(=CC=C1)[N+](  
 O-)=O  
 COC1=CC=C(C(=O)N2CCCNC(=O)CCCCNC(=O)C2C2=CNC3=C2C=C(Cl)C=C3)C(OC)=C1OC  
 CC(C)C1NC(=O)C(N(CCCCCNC1=O)C(=O)C1=C(S)C=CC=C1)C1=C(Br)C=CC(O)=C1  
 CC1=CC=C(S1)C(=O)N1CCCCCCCCNC(=O)CC(NC(=O)C1C1=C(Cl)C=CC=C1)C1=CC=C(Cl)C=C1  
 CC1=C(\C=C/S)C2(CCC1)N(CCNC(=O)CCCCNC2=O)C(=O)C1=CC(O)=C2C=CC=CC2=C1O  
 CC(C)CC1NC(=O)C(C)(CC(=O)OCC2=CC=CC=C2)N(CCCCCNC1=O)C(=O)CC1=CN=CC=C1  
 CC1=CC2(CCC1)N(CCCCCCCCCNC(=O)CCCCNC2=O)C(=O)C1=CC(F)=CC=C1  
 [H]C1(N(CCCCCNC(=O)C(CC2=CNC3=C2C=CC=C3)NC1=O)C(=O)[C@H](C)C1)C1=C(OC)C=CC=C1  
 COC1=CC=CC(\C=C\C(=O)N2CCSCCNC(=O)C(CC3=CNC4=C3C=CC=C4)NC(=O)C2C2=C(N)N=CN=C2)=C1OC  
 [H][C@@]12CC[C@H]([C@H](C)CCC(=O)N3CCCNC(=O)CCCNC(=O)C3CCC(=O)OC)[C@@]1(C)C(=O)C[C@@]1([  
 H])[C@@]2([H])C(=O)CC2CC(=O)CC[C@]12C  
 COC1=CC2=C(C=C1)C1(CC2)N(CCCCNC(=O)CC(NC1=O)C1=CC=C(Cl)C=C1)C(=O)C(C)C1=CC2=CC=C(OC)C=C2C  
 =C1  
 CC\C=C\C(=O)N1CCCCCCCCNC(=O)CC(CC(C)C)NC(=O)C1C1=C(C=CC(Cl)=C1)[N+](O-)=O  
 COC1=CC=C(C=C1)C1CC(=O)NCCCN(C(=O)CC2=CC(OCC3=CC=CC=C3)=C(OC)C=C2)C(CCl)(CC1)C(=O)N1  
 CC1=C(C=CC=C1)C1N(CCCCCCCCCNC(=O)C(CC2=CNC3=C2C=CC=C3)NC1=O)C(=O)C1=CN=C2C=CC=CC2=N1  
 COC1=C(C=CC=C1)C(=O)N1CCCCNC(=O)C(CC2=CNC3=C2C=CC=C3)NC(=O)C11CCCCC1  
 COC1=CC=C(C=C1)C1CC(=O)N[C@@H]2CCCC[C@H]2N(C(=O)[C@H](NC(=O)OC(C)(C)C(C)C(C)C(C)C2=CC(=  
 CC(=C2)C(F)(F)F)C(F)(F)F)C(=O)N1  
 CC(C)CC1NC(=O)C2(CCSC3=C2C=CC=C3)N(CC(C)(C)CNC1=O)C(=O)C(C)C1

FC1=CC=CC(CI)=C1C1N(CCCCCCCCNC(=O)CCCNC1=O)C(=O)CCCBr  
 [H]C1(N(CCCNC(=O)CCCNC1=O)C(=O)C(C)OC(=O)NC1=CC=CC=C1)C1=CC=CC(OC)=C1O  
 O=C(CC1=CC=CC=C1)N1CCCCNC(=O)CCNC(=O)C1C1=CC(=CC=C1)C#N  
 CC(C)(C)C(=O)N1[C@@H]2CCCC[C@H]2NC(=O)CC(NC(=O)C1C1=CC=CC=C1OC(F)(F)F)C1=CC=CC=C1  
 [H]C1(N(CCCCCNC(=O)CCNC1=O)C(=O)[C@@H](NC(=O)OC(C)(C)C)[C@@H](C)CC)C1=CC=C(OC)C(O)=C1  
 O=C(N1CCCCCCCCCNC(=O)CNC(=O)C1C1=CC=CN1)C1=CN=C2C=CC=CC2=C1  
 CC(C)CC1CC(=O)NC(C(N(C(C2=C3C=CC=CC3=CC=C2)C(=O)N1)C(=O)C1=CC=C(C=C1)B(O)O)C1=CC=CC=C1)C1  
 =CC=CC=C1  
 COC1=CC=CC=C1CC(=O)N1CCCCNC(=O)C(CC2=CC=CC=C2)NC(=O)C1(CCCC1)C1=CC=CC=C1  
 CC1(C)CNC(=O)CCCNC(=O)C(N(C1)C(=O)CCC=C)C1=C(N)N=CC=C1  
 CC(C)C1NC(=O)C(N(CCCCCCCCCCCCNC1=O)C(=O)C#CC1=CC=CC=C1)C1=C(CI)C=CC=C1  
 CCOC(=O)C(F)C1(C)N(CCNC(=O)CCCCNC1=O)C(=O)CCC1=CC=C(O)C=C1  
 [H]C1(N(CCCCCNC(=O)CCCNC1=O)C(=O)C1=C(C)C=CS1)C1=CC=CC(O)=C1  
 CC\C=C\C(=O)N1CCCCCCCCCNC(=O)C(CC2=CC=CC=C2)NC(=O)C11CCCCC1  
 COC(=O)CC1(CCI)N([C@@H]2CCCC[C@H]2NC(=O)CC(NC1=O)C1=CC=CC=C1)C(=O)CC1=CC(O)=C(OCC2=CC=C  
 C=C2)C=C1  
 FC1=C(C=CC=C1)C1N(CCCCCCCCNC(=O)CC(NC1=O)C1=CC=CC=C1)C(=O)CC1=CC=C2OCOC2=C1  
 CCOC(=O)C(CC)C1(C)N(CCCCCNC(=O)C(CC(C)C)NC1=O)C(=O)CCC1  
 [H]C1(\C=C\C2=CC=CC=C2)N(CCCCCCCCNC(=O)C(NC1=O)C(C)C)C(=O)C#C  
 [H]C1(N(CCCCCNC(=O)CC(NC1=O)C1=CC=C(CI)C=C1)C(=O)C1CCC=CC1)C1=CC(OC)=CC=C1OC  
 OC1=CC2=C(NC(=C2)C(=O)N2CCSNCNC(=O)CC(NC(=O)C22CC3=CC=CC=C3C2)C2=CC=CC=C2)C=C1  
 [H]C1(N(CCSCCNC(=O)CCCCNC1=O)C(=O)CCC)C1=CC=CC=C1  
 CC1=C(SC=C1)C1N(CCNC(=O)CCNC1=O)C(=O)[C@H]1O[C@@H](O)[C@H](O)[C@@H](O)[C@@H]1O  
 CC(C)C1=CC=C(C=C1)C1N(CC(O)CNC(=O)CNC1=O)C(=O)C(C)OC(=O)NC1=CC=CC=C1  
 CC1(N(CCNC(=O)CCCCNC1=O)C(=O)CC1CC2CCC1C2)C1=CC=C(CI)C=C1  
 CC(C)CC1NC(=O)C(N(CC(O)CNC1=O)C(=O)CNC(=O)OC(C)(C)C)C1=CSC2=C1C=CC=C2  
 CC1(CO)N(CCSCCNC(=O)CC(NC1=O)C1=CC=CC=C1)C(=O)C1=CC2=C(S1)C=CC=C2  
 [H]C1(N(CCSCCNC(=O)CCCCNC1=O)C(=O)C=C)C(C)=C  
 CC1=CC2(CCC1)N(C(C(NC(=O)CC(NC2=O)C1=CC=CC=C1)C1=CC=CC=C1)C1=CC=CC=C1)C(=O)CC1=CC(=C(O)C  
 =C1)[N+][([O-])=O  
 [H]C1(N(CCNC(=O)C(CC2=CNC3=C2C=CC=C3)NC1=O)C(=O)[C@@H](NC(=O)OCC1=CC=CC=C1)C(C)C)C1=CC(O  
 C)=CC=C1  
 CC(C)C1NC(=[O]C2=CC=C(C=C2)C(O)=O)C(N(CCCCCCCCCCCCNC1=O)C(C)=O)C1=C(CI)C=CC=C1  
 COC(=O)CC1(C)N(CC(C)C)CNC(=O)CC(NC1=O)C1=CC=C(CI)C=C1)C(=O)C1=C2C=CC=CC2=CC=C1

CC1=CC=CC=C1C(=O)N1CCCCCNC(=O)C(CC2=CNC3=C2C=CC=C3)NC(=O)C1(C)CC1  
FC1=CC=CC(F)=C1C1N(CCNC(=O)CC(NC1=O)C1=CC=CC=C1)C(=O)C1=CC=C(CBr)C=C1  
CCCCC(=O)N1C(C(NC(=O)CCNC(=O)C1)CCCC2=C1C(O)=CC=C2)C1=CC=CC=C1)C1=CC=CC=C1  
[H]C1(N(CCCCCCCCCCNC(=O)CCCCNC1=O)C(=O)C(Br)CBr)C1=CC(O)=CC=C1  
COC(=O)C1(N(CCCCCCNC(=O)C(CC(C)C)NC1=O)C(=O)CC1=CC=C2C=CC=CC2=C1)C1=CC=CC=C1  
COC1=CC=C(C=C1)C1CC(=O)NCCCCCN(C(C2=C(C)C=CC=C2)C(=O)N1)C(=O)C(F)(F)F  
BrC1=CC=C(C=C1)C(=O)N1CCCCCCCCCCCCNC(=O)C(CC2=CNC3=C2C=CC=C3)NC(=O)C1C1=CC2=CC=CC=C2S1  
COC1=CC=C(C=C1)C1CC(=O)N[C@@H]2CCCC[C@H]2N(C(C(=O)C2=CC=CC=C2)C(=O)N1)C(=O)[C@@H](NC(=O)OC(C)C)C(C)C  
CCCCCCCCCCCCCCCC(=O)N1CCCCCCCCCCCCNC(=O)CCCNC(=O)C1C1=C(OC)C(OC)=CC=C1  
CN1C(=CC2=C1C=CC=C2)C(=O)N1CC(C)C)CNC(=O)CC(NC(=O)C1C1=CC=C(C=C1)C1=CC=CC=C1)C1=CC=CC=C1  
CCOC(=O)C1CC1C1N(CCCNC(=O)CCCCNC1=O)C(=O)CC1=CC(O)=C(OC)C=C1  
COC(OC)C1(C)N(CCCCCNC(=O)C(NC1=O)C(C)C)C(=O)C1=CC=C2C=CC=CC2=C1  
COC1=CC=C2CCC3(N(CC(O)CNC(=O)C(CC4=CNC5=C4C=CC=C5)NC3=O)C(=O)C3=CC=CC(O)=C3O)C2=C1  
C1CCCC1(N(CCCCNC(=O)CNC1=O)C(=O)CCCI)C1=CC=CS1  
COC1=CC=C(C=C1)C1CC(=O)NC(C(N(C(C2=CNC3=C2C=CC=C3)C(=O)N1)C(=O)CC1=CC=C(CI)C=C1)C1=CC=CC=C1)C1=CC=CC=C1  
CC(C)C1NC(=O)C(N(CCNC1=O)C(=O)CCBr)C1=C(C=CC=C1)C(F)(F)F  
CC(C)CC1CC(=O)NCC(C)C)CN(C(C2=C(C)C=CC=C2)C(=O)N1)C(=O)C1=NC2=C(N1)C=CC=C2  
COC1=C(O)C=C(CCCC(=O)N2CCCNC(=O)C(NC(=O)C2C2=CC=C3C=CC=CC3=C2)C(C)C)C=C1  
CCCN(CC)C1CCC2(CC1)N(CCCCNC(=O)C(NC2=O)C(C)C)C(=O)C1=CC(OC)=C(OC)C(OC)=C1  
COC1=CC=C(C=C1)C1CC(=O)NCC(C)C)CN(C(=O)C2=C(O)C=CC=C2)C2(C3CC4CC(C3)CC2C4)C(=O)N1  
COC1=C(C=C)C(=O)N2CCSCCNC(=O)CCCNC(=O)C2\C(C)=C\C)C=CC=C1  
COC(=O)CCC1(C)N(CCCNC(=O)CCCCNC1=O)C(=O)CCC1=CC(OC)=C(OC)C=C1Br  
C=CCCCCCCC(=O)N1CCCCCCCCNC(=O)CCCNC(=O)C1(C1=CC=CC=C1)C1=CC=CC=C1  
CCCCC(=O)N1CCNC(=O)CC(NC(=O)C1C1=C(C=C(Br)C=C1)[N+][([O-])=O)C1=CC=C(OC)C=C1  
COC1=CC=CC2=C1CCCC21N(CCCCCCCCCCNC(=O)C(CC2=CC=CC=C2)NC1=O)C(=O)\C=C\C1=C(OC)C(OC)=CC=C1  
CC(C)C1NC(=O)C(CCCCI)(N(CCCCCCCCCCCCCCNC1=O)C(=O)CC1=C(CO)C=C2OCOC2=C1)C1=CC=C(F)C=C1  
COC1=C(OC)C=C(CCC(=O)N2CCCCCCCCCNC(=O)C(CC3=CNC4=C3C=CC=C4)NC(=O)C2(CCCCI)C2=CC=C(CI)C=C2)C(Br)=C1  
CC(C)CC1NC(=O)C(N([C@@H]2CCCC[C@H]2NC1=O)C(=O)C1=CC=CC=C1)C1=CC=CC(=C1)B1OC(C)C(C)C(C)C)O1  
CC1=CC=C(S1)C(=O)N1CCCCCCCCCCCCNC(=O)CCCNC(=O)C1(C)C1=CC=C(CI)C(CI)=C1

COC1=C(OC)C=C(C=C1)C1N(CCCCCNC(=O)C(CC(C)C)NC1=O)C(=O)CCC1=CC=CC(OC(=O)C2=CC=CC=C2)=C1  
 )N+][[O-]]=O  
 [O-][N+](=O)C1=C(Br)C=CC(=C1)C1N(CCCCNC(=O)CCCNC1=O)C(=O)CNC(=O)OCC1=CC=CC=C1  
 CC1(C)CNC(=O)CCCCNC(=O)C(CBr)(N(C1)C(=O)CC1=CC=C(O)C=C1)C1=CC=C(CI)C=C1  
 CC(C)CC1NC(=O)C2(CC3CCC(C2)N3C)N(CCCCCCCCCNC1=O)C(=O)\C=C\C1=CC(=CC=C1)C(F)(F)F  
 COC1=CC=C(C=C1)C1CC(=O)NCC(O)CN(C(=O)C2=CC=C(Br)O2)C(CCC1)(C2=CC=CC=C2)C(=O)N1  
 COC1=CC=CC(\C=C\C(=O)N2CC(O)CNC(=O)C(CC3=CC=CC=C3)NC(=O)C2C2=CC=C(C)C=C2)=C1OC  
 COC1=CC=C(C=C1)C1CC(=O)NCCCCCCCCCN(C(=O)C2=C(OC)C=CC(=C2)S(CI)(=O)=O)C2(CCC3=C2C(OC)=CC=C3)C(=O)N1  
 OC1=CC=C(CC(=O)N2CCCNC(=O)C(CC3=CC=CC=C3)NC(=O)C2CCC2=CC=CC=C2)C=C1C1  
 CC1=CC2(CCC1)N(CCCCNC(=O)CCCCNC2=O)C(=O)C1=CC=CC=N1  
 CN1C2CCC1CC1(C2)N(CC(C)C)CNC(=O)CCCCNC1=O)C(=O)C(F)(F)F  
 CC1(C)N(CCCCCCCCCNC(=O)CNC1=O)C(=O)CC1=CNC2=C1C=C(O)C=C2  
 [H]C1(C=C)N(C(C(NC(=O)CC(CC(C)C)NC1=O)C1=CC=CC=C1)C1=CC=CC=C1)C(=O)CCCC1=CC=CC=C1  
 [H]C1(C)N(CCCCCNC(=O)C(CC2=CC=CC=C2)NC1=O)C(=O)C(O)=O  
 COC1=C(C(=O)N2CC(O)CNC(=O)CCCCNC(=O)C22CCC=C2)C(Br)=CC=C1  
 COC(C(=O)N1CCCCNC(=O)CCCCNC(=O)C11CCC(C2=CC=CC=C2)C2=C1C=CC=C2)(C1=CC=CC=C1)C(F)(F)F  
 COC1=CC=CC=C1C1(C)N(CCCCNC(=O)C(CC2=CC=CC=C2)NC1=O)C(=O)C1=CNC2=C1C=CC=C2  
 COC1=CC=C2C(CCCC22N(CC(C)C)CNC(=O)C(CC(C)C)NC2=O)C(=O)C2=CC=C(OC)C=C2[N+][[O-]]=O=C1  
 CC1(C)CNC(=O)CCNC(=O)C(CCCCI)(N(C1)C(=O)CCC1=CC=CC=C1)C1=CC=C(F)C=C1  
 CIC1=CC=CC(CC(=O)N2CCCCNC(=O)CCNC(=O)C22CCCC3=C2C=CC=N3)=C1  
 CCC1(N(CCCCCCCCCNC(=O)CC(CC(C)C)NC1=O)C(=O)C1=CNC2=C1C=CC=C2)C1=CC=CC=C1  
 COC1=CC(OC)=C(C=C1)C1N(CCOCCOCCNC(=O)C(CC2=CNC3=C2C=CC=C3)NC1=O)C(=O)C1=CC=C(OC)C=C1[N+][[O-]]=O  
 COC1=CC2=C(OC(C)C22N(CC(C)C)CNC(=O)CC(CC(C)C)NC2=O)C(=O)CCC2=CC=CC=C2)C=C1  
 CC1=CC2(CCC1)N(CCCCCCCCCNC(=O)CCCNC2=O)C(=O)C1=CC2=C(N1)C=CC=C2  
 CCC(C)C1N(CCCCCCCCCNC(=O)CCCNC1=O)C(=O)C1=CSC=C1  
 CCC1(C)N(CC(O)CNC(=O)CC(CC(C)C)NC1=O)C(=O)C1=CC=CC(OC)=C1O  
 COC1=CC=C(C=C1)C1CC(=O)NCC(C)C)CN(C(=O)CC2=CNC3=C2C=CC=C3)C2(CCC2)C(=O)N1  
 CCOC(=O)CC1(C(C)C)N(CCNC(=O)CCNC1=O)C(=O)C(C)CC  
 CC1=CC=C(C=C1)C1N(CCNC(=O)CNC1=O)C(=O)CCNC(=O)OC(C)C)C  
 [H]C(=O)C1=CC=CC=C1C1([H])N(CCOCCOCCNC(=O)CCCCNC1=O)C(=O)CC1=CC=CC=C1OC  
 COC1=CC=CC(\C=C\C(=O)N2CC(O)CNC(=O)C(CC3=CC=CC=C3)NC(=O)C2C2=CN=C3C=CC=CC3=C2)=C1OC

CCCN(CC)C1CCC2(CC1)N(CCCCCCCCCNC(=O)CC(NC2=O)C1=CC=C(OC)C=C1)C(=O)C1=C(OC)C=CC(=C1)S(Cl)(=O)=O  
[H]C1(N(CCCNC(=O)C(CC2=CC=CC=C2)NC1=O)C(=O)CC1=CC=C(O)C(Cl)=C1)C1=CC=C(OC)C=C1  
CC1=C(SC=C1)C1N(CCCCCNC(=O)CCCNC1=O)C(=O)CC1CCC=C1  
CC(C)CC1(C)N(CCCCCCCCCNC(=O)C(CC2=CC=CC=C2)NC1=O)C(=O)CC1=CC=C(C=C1)[N+][([O-])]=O  
CCOC(=O)CC1(C(C)C)N(CCCNC(=O)CCCCNC1=O)C(=O)C1=CC=C(F)C(=C1)[N+][([O-])]=O  
[H]C1(N(CCCNC(=O)C(CC2=CC=CC=C2)NC1=O)C(=O)C1=C(C)C=C(C)C=C1)C1=CC=C(Br)C=C1  
CCC(C)C(=O)N1CCCCNC(=O)C(NC(=O)C1C1=CC=CN1)C(C)C  
[H]C1(N(CCCCCCCCCNC(=O)CCCCNC1=O)C(=O)CCC1=CC=CC(OC(=O)C2=CC=CC=C2)=C1)C(O)=O  
O=C(NCCCC(=O)N1CCCCNC(=O)CCCCNC(=O)C1C1=CC(=CC=C1)C#N)OCC1=CC=CC=C1  
OCC1(N(CC(O)CNC(=O)CC(NC1=O)C1=CC=C(Cl)C=C1)C(=O)C(O)=O)C1=CC=CC=C1  
[H]C1(N(CCCNC(=O)CC(NC1=O)C1=CC=C(Cl)C=C1)C(=O)CC1=CC=C(O)C=C1)C1=CC=CS1  
CCC(C)C(=O)N1CCCCCCCCCCCCNC(=O)CC(NC(=O)C11CCOC2=CC=CC=C12)C1=CC=C(OC)C=C1  
[H]C1(N(CCCCCNC(=O)C(CC2=CC=CC=C2)NC1=O)C(=O)CCC1=CC=CC(OC(=O)C2=CC=CC=C2)=C1)C1=CC=CC(O)=C1  
CC[C@H](C)[C@H](NC(=O)OC(C)C)C(=O)N1CCOCCOCCNC(=O)CC(NC(=O)C1C1=C(C=CC=C1)C(O)=O)C1=CC=C(Cl)C=C1  
O=C(NCCCC(=O)N1[C@@H]2CCCC[C@H]2NC(=O)CCCNC(=O)C11CC2=CC=CC=C2C1)OCC1=CC=CC=C1  
CC(C)CC1CC(=O)NCC(O)CN(C(C2=C(Br)C=CC=C2)C(=O)N1)C(=O)COC1=CC=C(Br)C=C1  
CC(C)CC1NC(=O)C(N(CCCNC1=O)C(=O)[C@@H](NC(=O)OCC1=CC=CC=C1)C(C)C)C1=C(C=CC=C1)B1OC(C)C(C)C(O)1  
COC1=CC=C(C=C1)C1CC(=O)N[C@@H]2CCCC[C@H]2N(C(C2=C(N)N=CN=C2)C(=O)N1)C(=O)C1=CC(Br)=CC=C1  
COC1=CC=C(CC2(C)N(CCCCCCCCCCCCCNC(=O)CCCNC2=O)C(=O)CCN2C3=C(SC4=C2C=CC=C4)C=CC=C3)C=C1  
O=C(N1CCCCCCCCNC(=O)CCCNC(=O)C11CCN(CC2=CC=CC=C2)CC1)C1=C2C=CC=CC2=CC=C1  
[H]C1(N(CCCCCCCCCCCCCNC(=O)CC(NC1=O)C1=CC=C(OC)C=C1)C(=O)CCCCCCCC=C)C1=CC(OC)=CC(OC)=C1  
CCCCC(=O)N1CCCCNC(=O)CC(CC(C)C)NC(=O)C1(CC1=CC=CC=C1)CC1=CC=CC=C1

**List of 221 amino isocyanides smiles:**

NCCNC(=O)C[N+]#[C-]  
CC(C)CC(CC(=O)NCCCCCCCCN)[N+]#[C-]  
NC1=CC=CC=C1NC(=O)C(CC1=CNC2=C1C=CC=C2)[N+]#[C-]  
NC(C(NC(=O)CCC[N+]#[C-])C1=CC=CC=C1)C1=CC=CC=C1  
N[C@@H]1CCCC[C@H]1NC(=O)CC[N+]#[C-]  
CC(C)CC(CC(=O)NCC(C)C)CN[N+]#[C-]  
NCC1=CC=CC(CNC(=O)CC([N+]#[C-])C2=CC=C(Cl)C=C2)=C1

NCCCCCCCCCCCCNC(=O)C(CC1=CNC2=C1C=CC=C2)[N+]#[C-]  
 NCCCCCCCCCCCCNC(=O)CCC[N+]#[C-]  
 NCC(O)CNC(=O)CC[N+]#[C-]  
 CC(C)CC(CC(=O)NCCCCCN)[N+]#[C-]  
 NCCOCCOCCNC(=O)C(CC1=CNC2=C1C=CC=C2)[N+]#[C-]  
 NCCCCCNC(=O)CCC[N+]#[C-]  
 CC(C)CC(CC(=O)NCCSCCN)[N+]#[C-]  
 NCCCNC(=O)C(CC1=CNC2=C1C=CC=C2)[N+]#[C-]  
 COC1=CC=C(C=C1)C(CC(=O)NCCCCCN)[N+]#[C-]  
 NCCOCCOCCNC(=O)CC([N+]#[C-])C1=CC=C(C1)C=C1  
 NCCCCCNC(=O)C(CC1=CNC2=C1C=CC=C2)[N+]#[C-]  
 NCCCCCCCCNC(=O)CCC[N+]#[C-]  
 NC1=CC=CC=C1NC(=O)CC[N+]#[C-]  
 NC(C(NC(=O)C[N+]#[C-])C1=CC=CC=C1)C1=CC=CC=C1  
 N[C@@H]1CCCC[C@H]1NC(=O)C[N+]#[C-]  
 NCCCCNC(=O)C[N+]#[C-]  
 CC(C)CC(CC(=O)NCCCCCCCCCCCN)[N+]#[C-]  
 NC(C(NC(=O)C(CC1=CC=CC=C1)[N+]#[C-])C1=CC=CC=C1)C1=CC=CC=C1  
 N[C@@H]1CCCC[C@H]1NC(=O)CCCC[N+]#[C-]  
 CC(C)CC([N+]#[C-])C(=O)NCCCCCN  
 NCCCCCCCCNC(=O)CCCC[N+]#[C-]  
 NC1=CC=CC=C1NC(=O)CCC[N+]#[C-]  
 CC(C)CC(CC(=O)NCCCN)[N+]#[C-]  
 NCCNC(=O)C(CC1=CNC2=C1C=CC=C2)[N+]#[C-]  
 CC(C)(CN)CNC(=O)CCC[N+]#[C-]  
 CC(C)CC(CC(=O)NCCCCN)[N+]#[C-]  
 NCC1=CC=C(CNC(=O)C(CC2=CC=CC=C2)[N+]#[C-])C=C1  
 CC(C)C([N+]#[C-])C(=O)NC(C(N)C1=CC=CC=C1)C1=CC=CC=C1  
 CC(C)(CN)CNC(=O)CC([N+]#[C-])C1=CC=C(C1)C=C1  
 NCC1=CC=CC(CNC(=O)C(CC2=CNC3=C2C=CC=C3)[N+]#[C-])=C1  
 NCCCCCCCCCCCCNC(=O)CCC[N+]#[C-]  
 CC(C)CC([N+]#[C-])C(=O)NC1=CC=CC=C1N

NC(C(NC(=O)CCCCC[N+][C-])C1=CC=CC=C1)C1=CC=CC=C1  
 N[C@@H]1CCCC[C@H]1NC(=O)CCC[N+][C-]  
 NCCCCNC(=O)CC[N+][C-]  
 NCCCCNC(=O)C[N+][C-]  
 NCCOCCOCCNC(=O)C[N+][C-]  
 CC(C)CC(CC(=O)NCCCCCCCCCN)[N+][C-]  
 NCC(O)CNC(=O)C(CC1=CNC2=C1C=CC=C2)[N+][C-]  
 COC1=CC=C(C=C1)C(CC(=O)NCCCCCCCCCN)[N+][C-]  
 NC1=CC=CC=C1NC(=O)CCCCC[N+][C-]  
 CC(C)CC([N+][C-])C(=O)NCCSCCN  
 CC(C)C([N+][C-])C(=O)NCCSCCN  
 CC(C)C([N+][C-])C(=O)NCCCCCCCCCN  
 CC(C)C([N+][C-])C(=O)N[C@@H]1CCCC[C@H]1N  
 CC(C)C([N+][C-])C(=O)NCCCCCCCCCCCCCN  
 NCCCCCCCCCCCCNC(=O)CCCC[N+][C-]  
 COC1=CC=C(C=C1)C(CC(=O)NCC1=CC=C(CN)C=C1)[N+][C-]  
 CC(C)C([N+][C-])C(=O)NCCCCN  
 NCCCCCNC(=O)CCCC[N+][C-]  
 CC(C)CC([N+][C-])C(=O)NCC1=CC(CN)=CC=C1  
 NCCCCCCCCCCCCCNC(=O)CCCC[N+][C-]  
 COC1=CC=C(C=C1)C(CC(=O)NCC(C)(C)CN)[N+][C-]  
 CC(C)C([N+][C-])C(=O)NCCN  
 CC(C)(CN)CNC(=O)CCCC[N+][C-]  
 NCC1=CC=CC(CNC(=O)CC[N+][C-])=C1  
 NCCCCCCCCCCCCCNC(=O)C[N+][C-]  
 NCCSCCNC(=O)CC([N+][C-])C1=CC=C(C1)C=C1  
 NCCCCCCCCCCCCCNC(=O)CC([N+][C-])C1=CC=C(C1)C=C1  
 NCC1=CC=C(CNC(=O)CC([N+][C-])C2=CC=CC=C2)C=C1  
 NCCCCCNC(=O)CC([N+][C-])C1=CC=CC=C1  
 NCCOCCOCCNC(=O)C(CC1=CC=CC=C1)[N+][C-]  
 COC1=CC=C(C=C1)C(CC(=O)NCCOCCOCCN)[N+][C-]  
 CC(C)C([N+][C-])C(=O)NCC(O)CN

CC(C)C([N+]#[C-])C(=O)NCCCCCCCCCN  
 NCCCCCNC(=O)CC([N+]#[C-])C1=CC=C(Cl)C=C1  
 NCCCCCCCCCNC(=O)CC([N+]#[C-])C1=CC=CC=C1  
 NC1=CC=CC=C1NC(=O)C(CC1=CC=CC=C1)[N+]#[C-]  
 COC1=CC=C(C=C1)C(CC(=O)N[C@@H]1CCCC[C@H]1N)[N+]#[C-]  
 NCCCCCNC(=O)CCCC[N+]#[C-]  
 CC(C)CC([N+]#[C-])C(=O)NCCCCN  
 NC1=CC=CC=C1NC(=O)CC([N+]#[C-])C1=CC=C(Cl)C=C1  
 NC(C(NC(=O)C(CC1=CNC2=C1C=CC=C2)[N+]#[C-])C1=CC=CC=C1)C1=CC=CC=C1  
 CC(C)C([N+]#[C-])C(=O)NCC1=CC=C(CN)C=C1  
 NCC1=CC=C(CNC(=O)CCCC[N+]#[C-])C=C1  
 NCC1=CC=C(CNC(=O)CC[N+]#[C-])C=C1  
 NCC1=CC=C(CNC(=O)C[N+]#[C-])C=C1  
 CC(C)CC(CC(=O)N[C@@H]1CCCC[C@H]1N)[N+]#[C-]  
 NCCCCCNC(=O)C(CC1=CNC2=C1C=CC=C2)[N+]#[C-]  
 NCCCCCNC(=O)CCC[N+]#[C-]  
 NCCOCCOCCNC(=O)CC[N+]#[C-]  
 NCCCCCNC(=O)C[N+]#[C-]  
 NCCCCCNC(=O)CC([N+]#[C-])C1=CC=C(Cl)C=C1  
 NCC1=CC=CC(CNC(=O)C(CC2=CC=CC=C2)[N+]#[C-])=C1  
 CC(C)C([N+]#[C-])C(=O)NCCCCCN  
 CC(C)C([N+]#[C-])C(=O)NCCOCCOCCN  
 NCCCCCNC(=O)CCCC[N+]#[C-]  
 NCCCCCCCCCNC(=O)CC[N+]#[C-]  
 NCC1=CC=CC(CNC(=O)CC([N+]#[C-])CC(C)C)=C1  
 NCCCCCCCCCNC(=O)CC([N+]#[C-])C1=CC=C(Cl)C=C1  
 NCCCCCCCCCNC(=O)CC([N+]#[C-])C1=CC=CC=C1  
 NCC(O)CNC(=O)C(CC1=CC=CC=C1)[N+]#[C-]  
 NCCSCCNC(=O)CCCC[N+]#[C-]  
 CC(C)CC([N+]#[C-])C(=O)NCCCCCN  
 NCC1=CC=C(CNC(=O)CC([N+]#[C-])C2=CC=C(Cl)C=C2)C=C1  
 NCC1=CC=C(CNC(=O)C(CC2=CNC3=C2C=CC=C3)[N+]#[C-])C=C1



NCC1=CC=C(CNC(=O)CCC[N+]#[C-])C=C1  
 CC(C)CC([N+]#[C-])C(=O)NCC(O)CN  
 NCCCCCCCCNC(=O)C(CC1=CC=CC=C1)[N+]#[C-]  
 NC1=CC=CC=C1NC(=O)CCCC[N+]#[C-]  
 NC(C(NC(=O)CC[N+]#[C-])C1=CC=CC=C1)C1=CC=CC=C1  
 CC(C)CC(CC(=O)NC(C(N)C1=CC=CC=C1)C1=CC=CC=C1)[N+]#[C-]  
 N[C@@H]1CCCC[C@H]1NC(=O)C(CC1=CNC2=C1C=CC=C2)[N+]#[C-]  
 COC1=CC=C(C=C1)C(CC(=O)NCC1=CC(CN)=CC=C1)[N+]#[C-]  
 CC(C)C([N+]#[C-])C(=O)NCCCN  
 CC(C)C([N+]#[C-])C(=O)NCC1=CC(CN)=CC=C1  
 NCCCCCCCCCCCCNC(=O)CCCC[N+]#[C-]  
 NCCCCCCCCCCCCNC(=O)CC[N+]#[C-]  
 CC(C)CC([N+]#[C-])C(=O)NCCCCCCCCCCCCN  
 NCCCCCCCCCCCCNC(=O)CCCC[N+]#[C-]  
 NCC(O)CNC(=O)CCC[N+]#[C-]  
 NCCSCCNC(=O)CC[N+]#[C-]  
 CC(C)CC(CC(=O)NCC(O)CN)[N+]#[C-]  
 NCCSCCNC(=O)C(CC1=CNC2=C1C=CC=C2)[N+]#[C-]  
 COC1=CC=C(C=C1)C(CC(=O)NC(C(N)C1=CC=CC=C1)C1=CC=CC=C1)[N+]#[C-]  
 N[C@@H]1CCCC[C@H]1NC(=O)CCCC[N+]#[C-]  
 NCCCCNC(=O)CCC[N+]#[C-]  
 CC(C)CC([N+]#[C-])C(=O)NCC1=CC=C(CN)C=C1  
 NCC1=CC=C(CNC(=O)CCCC[N+]#[C-])C=C1  
 COC1=CC=C(C=C1)C(CC(=O)NCCCCN)[N+]#[C-]  
 NCCOCCOCCNC(=O)CCCC[N+]#[C-]  
 CC(C)CC([N+]#[C-])C(=O)NCCCN  
 NCCCCNC(=O)CCCC[N+]#[C-]  
 NCCOCCOCCNC(=O)CCC[N+]#[C-]  
 CC(C)CC(CC(=O)NCCN)[N+]#[C-]  
 NCCNC(=O)CC([N+]#[C-])C1=CC=CC=C1  
 NCCNC(=O)C(CC1=CC=CC=C1)[N+]#[C-]  
 COC1=CC=C(C=C1)C(CC(=O)NCCCCN)[N+]#[C-]

NCCCCCNC(=O)CC([N+]#[C-])C1=CC=C(Cl)C=C1  
 NCCCCCCCCNC(=O)C(CC1=CNC2=C1C=CC=C2)[N+]#[C-]  
 COC1=CC=C(C=C1)C(CC(=O)NCCN)[N+]#[C-]  
 CC(C)C([N+]#[C-])C(=O)NC1=CC=CC=C1N  
 NC(C(NC(=O)CCCC[N+]#[C-])C1=CC=CC=C1)C1=CC=CC=C1  
 CC(C)CC([N+]#[C-])C(=O)NCCCCCCCCN  
 NCCNC(=O)CC([N+]#[C-])C1=CC=CC=C1  
 CC(C)(CN)CNC(=O)C(CC1=CC=CC=C1)[N+]#[C-]  
 COC1=CC=C(C=C1)C(CC(=O)NC1=CC=CC=C1N)[N+]#[C-]  
 NC(C(NC(=O)CC([N+]#[C-])C1=CC=C(Cl)C=C1)C1=CC=CC=C1)C1=CC=CC=C1  
 NCCCCCCCCCCCCCNC(=O)CC([N+]#[C-])C1=CC=CC=C1  
 CC(C)(CN)CNC(=O)CC([N+]#[C-])C1=CC=CC=C1  
 N[C@@H]1CCCC[C@H]1NC(=O)CC([N+]#[C-])C1=CC=CC=C1  
 NCCCCNC(=O)C(CC1=CC=CC=C1)[N+]#[C-]  
 COC1=CC=C(C=C1)C(CC(=O)NCCSCCN)[N+]#[C-]  
 NCCNC(=O)CCCCC[N+]#[C-]  
 NCCNC(=O)CCC[N+]#[C-]  
 CC(C)CC([N+]#[C-])C(=O)NCCCCCCCCCN  
 NCCCCCCCCCCCCCNC(=O)C(CC1=CC=CC=C1)[N+]#[C-]  
 NCC(O)CNC(=O)CCCC[N+]#[C-]  
 CC(C)CC([N+]#[C-])C(=O)NC(C(N)C1=CC=CC=C1)C1=CC=CC=C1  
 NCCCCCCCCCCCCCNC(=O)C(CC1=CC=CC=C1)[N+]#[C-]  
 CC(C)C([N+]#[C-])C(=O)NCCCCCN  
 NCCCCCCCCNC(=O)CCCC[N+]#[C-]  
 COC1=CC=C(C=C1)C(CC(=O)NCCCCCCCCCN)[N+]#[C-]  
 NCC(O)CNC(=O)CCCCC[N+]#[C-]  
 NCCSCCNC(=O)CCC[N+]#[C-]  
 NCCNC(=O)CC[N+]#[C-]  
 CC(C)CC(CC(=O)NC1=CC=CC=C1N)[N+]#[C-]  
 NCCCCCNC(=O)C(CC1=CC=CC=C1)[N+]#[C-]  
 NCCOCCOCCNC(=O)CCCC[N+]#[C-]  
 NCCCCCNC(=O)CC[N+]#[C-]

NCCCCCCCCNC(=O)C[N+][C-]  
 NC1=CC=CC=C1NC(=O)C[N+][C-]  
 CC(C)CC(CC(=O)NCC1=CC=C(CN)C=C1)[N+][C-]  
 NCCCCCCCCCCCCNC(=O)CC([N+][C-])C1=CC=C(CI)C=C1  
 NCCCCCCCCCCCCNC(=O)C(CC1=CNC2=C1C=CC=C2)[N+][C-]  
 COC1=CC=C(C=C1)C(CC(=O)NCCCN)[N+][C-]  
 NCCNC(=O)CCCCC[N+][C-]  
 CC(C)CC([N+][C-])C(=O)NCCN  
 CC(C)(CN)CNC(=O)CCCCC[N+][C-]  
 CC(C)CC([N+][C-])C(=O)NCCOCCOCCN  
 NCCCCCNC(=O)CCCCC[N+][C-]  
 CC(C)CC([N+][C-])C(=O)N[C@@H]1CCCC[C@@H]1N  
 NCC(O)CNC(=O)CC([N+][C-])C1=CC=C(CI)C=C1  
 NCC1=CC=CC(CNC(=O)CC([N+][C-])C2=CC=CC=C2)=C1  
 NCC(O)CNC(=O)CC([N+][C-])C1=CC=CC=C1  
 NCCSCCNC(=O)C(CC1=CC=CC=C1)[N+][C-]  
 NCCCNC(=O)CCCC[N+][C-]  
 CC(C)CC([N+][C-])C(=O)NCC(C)(C)CN  
 NCC1=CC=CC(CNC(=O)CCCC[N+][C-])=C1  
 COC1=CC=C(C=C1)C(CC(=O)NCC(O)CN)[N+][C-]  
 NCCSCCNC(=O)CCCCC[N+][C-]  
 NCCCNC(=O)CCC[N+][C-]  
 NCCNC(=O)CC[N+][C-]  
 CC(C)(CN)CNC(=O)C[N+][C-]  
 NCCNC(=O)CC([N+][C-])C1=CC=C(CI)C=C1  
 CC(C)(CN)CNC(=O)C(CC1=CNC2=C1C=CC=C2)[N+][C-]  
 NCC1=CC=CC(CNC(=O)CCC[N+][C-])=C1  
 CC(C)CC(CC(=O)NCCOCCOCCN)[N+][C-]  
 NCCCCNC(=O)CC([N+][C-])C1=CC=CC=C1  
 NCCCCCNC(=O)CC([N+][C-])C1=CC=CC=C1  
 NC1=CC=CC=C1NC(=O)CC([N+][C-])C1=CC=CC=C1  
 NCCOCCOCCNC(=O)CC([N+][C-])C1=CC=CC=C1

NCCSCCNC(=O)CC([N+]#[C-])C1=CC=CC=C1  
NCCCNC(=O)C(CC1=CC=CC=C1)[N+]#[C-]  
NCCNC(=O)CCCC[N+]#[C-]  
CC(C)(CN)CNC(=O)CC[N+]#[C-]  
NCC1=CC=CC(CNC(=O)C[N+]#[C-])=C1  
NCCCCNC(=O)CC([N+]#[C-])C1=CC=C(Cl)C=C1  
NCCCCCNC(=O)C(CC1=CNC2=C1C=CC=C2)[N+]#[C-]  
COC1=CC=C(C=C1)C(CC(=O)NCCCCCCCCCCCCN)[N+]#[C-]  
N[C@@H]1CCCC[C@H]1NC(=O)CC([N+]#[C-])C1=CC=C(Cl)C=C1  
NC(C(NC(=O)CC([N+]#[C-])C1=CC=CC=C1)C1=CC=CC=C1)C1=CC=CC=C1  
N[C@@H]1CCCC[C@H]1NC(=O)C(CC1=CC=CC=C1)[N+]#[C-]  
NCCCCNC(=O)CCCC[N+]#[C-]  
NCCCCCNC(=O)CC[N+]#[C-]  
CC(C)CC(CC(=O)NCCCCCN)[N+]#[C-]  
NCCCCCNC(=O)C(CC1=CC=CC=C1)[N+]#[C-]  
CC(C)C([N+]#[C-])C(=O)NCC(C)(C)CN  
NCC1=CC=CC(CNC(=O)CCCC[N+]#[C-])=C1  
NCCCCCCCCCCCCCNC(=O)CC[N+]#[C-]  
NCCCCCCCCCNC(=O)C[N+]#[C-]  
NCC(O)CNC(=O)C[N+]#[C-]  
NCCSCCNC(=O)C[N+]#[C-]  
NCCCNC(=O)C[N+]#[C-]

**List of 272 oxo compounds smiles:**

[H]C(C)=O  
[H]C(=O)C=C  
CC(C)=O  
[H]C(=O)CC  
CC(=O)C=C  
O=C1CCC1  
[H]C(=O)\C=C\C  
[H]C(=O)C(C)=C  
O=CC1CC1

CC(=O)C=O  
CCC(C)=O  
[H]C(=O)CCC  
CC(C)C=O  
[H]C(=O)C(O)=O  
CC(=O)CO  
CICC=O  
O=C1CCC=C1  
O=C1CCCC1  
C\C=C(/C)C=O  
CC(C)C(C)=O  
CCC(=O)CC  
CCC(C)C=O  
CC(C)CC=O  
CC(C)(C)C=O  
[H]C(=O)C(O)CO  
CC(=O)CC1  
O=CC1=CC=CN1  
[H]C(=O)C1=CC=CO1  
O=C1CCCC=C1  
O=C1CCCCC1  
CC(C)=CC(C)=O  
CC(=O)CCC=C  
O=C1CCOCC1  
[H]C(=O)CCCC([H])=O  
CC(C)CC(C)=O  
[H]C(=O)CCCCC  
CCOC(=O)C=O  
[H]C(=O)C(OC)OC  
CSCCC=O  
[H]C(=O)C1=CC=CC=C1  
O=CC1=CC=NC=C1

O=CC1=CC=CN=C1  
CC1=CC(=O)CCC1  
[H]C(=O)C1=CC=CS1  
[H]C(=O)C1=CSC=C1  
CC1(C)CCCC1=O  
O=CC1CCCCC1  
CN1CCC(=O)CC1  
CCC(=O)C(=O)CC  
CCCC(=O)CCC  
COC(=O)CC(C)=O  
COC(=O)CCC=O  
COC(OC)C(C)=O  
CC(=O)C1=CC=CC=C1  
O=CCC1=CC=CC=C1  
CC1=CC=C(C(=O))C=C1  
O=CCC1=CC=CC=C1  
CC1=CC=CC(C=O)=C1  
CC1=C(C(=O))C=CC=C1  
[H]C(=O)C1=CC=CC(O)=C1  
[H]C(=O)C1=CC(O)=CC=C1  
OC1=C(C(=O))C=CC=C1  
[H]C(=O)C1=CC=C(O)C=C1  
NC1=C(C(=O))C=CC=N1  
NC1=C(C(=O))C=NC=N1  
FC1=CC=C(C(=O))C=C1  
FC1=C(C(=O))C=CC=C1  
FC1=CC=CC(C=O)=C1  
[H]C(=O)C1=CC=C(C)S1  
CC1=C(SC=C1)C=O  
CICC(=O)CC1  
CCOC(=O)CC(C)=O  
COC(=O)CCC(C)=O

COC(=O)CCC(C)=O  
COC(=O)CCCC=O  
O=CC1=CC(=CC=C1)C#N  
O=CC1=CC=C(C=C1)C#N  
O=CC1=CC(=CC=C1)C#N  
O=C1CC2=CC=CC=C2C1  
[H]C(=O)C=C\C1=CC=CC=C1  
ClC1CCCCC1=O  
[H]C(=O)C1=CC=CC=C1C([H])=O  
O=CC(=O)C1=CC=CC=C1  
CC(=O)CC1=CC=CC=C1  
CCC(=O)C1=CC=CC=C1  
O=CCCC1=CC=CC=C1  
OCC(=O)C1=CC=CC=C1  
CC(=O)C1=C(O)C=CC=C1  
[H]C(=O)C1=CC=C(OC)C=C1  
[H]C(=O)C1=C(OC)C=CC=C1  
[H]C(=O)C1=CC(OC)=CC=C1  
[H]C(=O)C1=CC=CC(O)=C1O  
OC1=C(O)C=C(C=O)C=C1  
OC1=CC(O)=C(C=O)C=C1  
CC(=O)C1=CC=CC(F)=C1  
CN1C2CCC1CC(=O)C2  
CCOC1=CC(=O)CCC1  
CCC(=O)C1=CC=CS1  
[H]C(=O)C1=CC=C(Cl)C=C1  
[H]C(=O)C1=CC=CC(Cl)=C1  
ClC1=C(C=O)C=CC=C1  
CCCN1CCC(=O)CC1  
FC1=CC(F)=C(C=O)C=C1  
FC1=CC=CC(F)=C1C=O  
CCOC(=O)C1CC1C=O

COC(=O)CCCC(C)=O  
CCC(C(C)=O)C(=O)OC  
COC(=O)CCCCC=O  
O=CC1=CNC2=C1C=CC=C2  
O=CC1=CC=CC2=C1C=CN2  
O=CC1=CC2=C(NC=C2)C=C1  
OC(=O)CC(=O)CC(O)=O  
O=CC1=CC=C2C=NNC2=C1  
O=CC1=CC=C2NN=CC2=C1  
O=C1CCC2=CC=CC=C2C1  
O=C1CCCC2=C1C=CC=C2  
O=C(C1CC1)C1=CC=CC=C1  
O=C1CCCC2=C1C=CC=N2  
CCOC(=O)C(F)C(C)=O  
O=C1CCOC2=CC=CC=C12  
OC1=CC=CC2=C1C(=O)CC2  
CC(=O)C1=C(C=O)C=CC=C1  
CC(C)C1=CC=C(C=O)C=C1  
[H]C(=O)C1=CC2=C(OC2)C=C1  
OC(=O)C1=C(C=O)C=CC=C1  
OC(=O)C1=CC=C(C=O)C=C1  
CCC(=O)C1=CC=C(O)C=C1  
COC1=CC=CC=C1C(C)=O  
CCC(=O)C1=C(O)C=CC=C1  
O=CCOCC1=CC=CC=C1  
CC(=C)C1CC=C(C)C(=O)C1  
O=C1C2CC3CC(C2)CC1C3  
COC(=O)CC(=O)CC1  
[H]C(=O)C1=CC(=CC=C1)[N+][O-]=O  
[O-][N+](=O)C1=CC=C(C=O)C=C1  
[H]C(=O)C1=CC=CC=C1[N+][O-]=O  
[O-][N+](=O)C1=C(C=O)C=CC=C1



[O-][N+](=O)C1=CC=CC=C1C=O  
CC(=O)C1=CC(O)=CC(O)=C1  
[H]C(=O)C1=CC=C(OC)C(O)=C1  
[H]C(=O)C1=CC=CC(OC)=C1O  
[H]C(=O)C1=C(OC)C=CC=C1O  
CCC(=O)C1=CC=C(F)C=C1  
CC1(C)C2CCC1(C)C(=O)C2  
CC(C)=CCC\C(C)=C\C=O  
CC(=O)C1=CC=C(Cl)C=C1  
ClCC(=O)C1=CC=CC=C1  
COC(=O)C1CCCCC1=O  
CCOC(=O)C1CCCC1=O  
O=CC1=C2C=CC=CC2=CC=C1  
O=CC1=CC=C2C=CC=CC2=C1  
O=CC1=CN=C2C=CC=CC2=C1  
CCOC(=O)C(CC)C(C)=O  
CCOC(=O)CC(=O)C(C)C  
FC1=CC=CC(Cl)=C1C=O  
FC1=CC=C(C=O)C(Cl)=C1  
FC1=CC(C=O)=C(Cl)C=C1  
CC(C)(C)OC(=O)NCC=O  
FC1=CC(C=O)=CC(F)=C1F  
COC1CC(C=O)C(OC)O1  
CC1CCC2=CC=CC=C2C1=O  
COC1=CC2=C(C=C1)C(=O)CC2  
COC1=CC=C2CCC(=O)C2=C1  
COC1=CC=CC2=C1C(=O)CC2  
O=CC1=CSC2=C1C=CC=C2  
O=CC1=CC2=CC=CC=C2S1  
COC(=O)C(=O)C1=CC=CC=C1  
COC1=CC=CC=C1CC(C)=O  
COC1=CC=C(CC(C)=O)C=C1

COC1=CC(CC(C)=O)=CC=C1  
O=C1CCSC2=C1C=CC=C2  
CCOC(=O)CC(=O)CC1  
CCOC(=O)C(Cl)C(C)=O  
FC(F)(F)C(=O)C(F)(F)F  
[H]C(=O)C1=CC=C(OC)C(OC)=C1  
[H]C(=O)C1=CC(OC)=CC=C1OC  
[H]C(=O)C1=CC(OC)=CC(OC)=C1  
COC1=CC=CC(C=O)=C1OC  
COC1=CC(OC)=C(C=O)C=C1  
CC(=O)OCC1=CC=C(O1)C=O  
CC1=C(\C=C/S)C(=O)CCC1  
O=C1CCCCCCCCC1  
C=CCCCCCCCC=O  
ClCCC(=O)C1=CC=CC=C1  
CCC(=O)C1=CC=C(Cl)C=C1  
CCOC(=O)C1CCC(=O)CC1  
CCOC(=O)C1CCCCC1=O  
CC(=O)C1=CC=CC2=C1C=CC=C2  
CCOC(=O)N1CCC(=O)CC1  
CC1=CC=C(F)C(C=O)=C1Cl  
FC(F)(F)C1=C(C=O)C=CC=C1  
FC(F)(F)C1=CC=C(C=O)C=C1  
O=C1CCC(CC1)C1=CC=CC=C1  
BrC1=CC=C(O1)C=O  
[H]C(=O)C1=CC=CC(Cl)=C1Cl  
ClC1=CC=CC(Cl)=C1C=O  
ClC1=C(Cl)C=C(C=O)C=C1  
COC1=CC2=C(CCCC2=O)C=C1  
COC1=CC=CC2=C1CCCC2=O  
COC1=CC=C2C(=O)CCCC2=C1  
FC1=CC=C(Cl)C(F)=C1C=O

FC1=CC=C(F)C(C=O)=C1Cl  
ClC1=CC2=C(NC=C2C=O)C=C1  
ClC1=CC2=C(C=C1)C(C=O)=CN2  
ClC1=CC2=C(C=C1)C(C=O)=CN2  
OC(=O)COC1=CC=C(C=O)C=C1  
COC1=C(OC)C=C(C=C1)C(C)=O  
CC1(C)C2CCC1(C(O)=O)C(=O)C2  
O=C(C1=CC=CC=C1)C1=CC=CC=C1  
O=CC1=CC=C(C=C1)C1=CC=CC=C1  
ClCCCC(=O)C1=CC=CC=C1  
CCCN(CC)C1CCC(=O)CC1  
[H]C(=O)C1=CC=C(Br)C=C1  
BrC1=CC=CC(C=O)=C1  
BrC1=CC=CC(C=O)=C1  
BrC1=C(C=O)C=CC=C1  
[O-][N+](=O)C1=C(C=O)C=C(Cl)C=C1  
ClCCCC(=O)C1=CC=CS1  
CC(=O)C1=CC=C(Cl)C(Cl)=C1  
O=C1CCCN(CC2=CC=CC=C2)C1  
O=C1CCN(CC2=CC=CC=C2)CC1  
FC(F)(F)OC1=CC=CC=C1C=O  
FC(F)(F)OC1=CC=C(C=O)C=C1  
BrC1=CC=C(S1)C=O  
[H]C(=O)C1=CC=C(Br)S1  
COC1=CC2=C(OCC(C)C2=O)C=C1  
CC(=O)CC(=O)OCC1=CC=CC=C1  
COC1=C(OC)C=C(CC(C)=O)C=C1  
[O-][N+](=O)C1=CC2=C(OC2)C=C1C=O  
COC1=CC(C=O)=CC(OC)=C1OC  
O=C(CC1=CC=CC=C1)C1=CC=CC=C1  
O=CC1=CC(OC2=CC=CC=C2)=CC=C1  
BrCC(=O)C1=CC=CC=C1

CC(C)(C)OC(=O)N1CCC(=O)CC1  
[H]C(=O)C1=CC=C(OC)C(OC)=C1Cl  
FC1=CC=C(C=C1)C(=O)CCCC1  
[H]C(=O)C1=C(O)C=CC(Br)=C1  
OC1=CC(C=O)=C(Br)C=C1  
FC1=CC=C2C(NC=C2C(=O)CC#N)=C1  
CCOC(=O)CC(=O)CC(=O)OCC  
O=C1CCN(CCC2=CC=CC=C2)CC1  
COC1=CC=CC(=C1)C1CCCCC1=O  
CC(CC1=CC=C(C=C1)C(C)(C)C)C=O  
CC(=O)C1=CC=C(Br)S1  
O=C(CC1=CC=CC=C1)CC1=CC=CC=C1  
COC1=C(OC)C=C(C(C=O)=C1)[N+](=[O-])=O  
O=CC1=CC(OCC2=CC=CC=C2)=CC=C1  
O=CC1=CC=C(OCC2=CC=CC=C2)C=C1  
BrCCC1=CC=C(C=O)C=C1  
CC(=O)C1=C(O)C=CC(Br)=C1  
[H]C(=O)C1=C(OC)C=CC(Br)=C1  
[H]C(=O)C1=C(Br)C=CC(OC)=C1  
FC1=CC(=CC=C1)C(=O)CBr  
ClCCCC(=O)C1=CC=C(Cl)C=C1  
CC(C)(C)OC(=O)NC1=CC=CC(C=O)=C1  
O=C1CCC(C2=CC=CC=C2)C2=C1C=CC=C2  
CC(=O)C1=CC=C(Cl)C(Cl)=C1Cl  
COC(=O)C1=C(C=O)C(OC)=CC(OC)=C1  
[O-][N+](=O)C1=C(Br)C=CC(C=O)=C1  
[O-][N+](=O)C1=C(C=O)C=CC(Br)=C1  
[H]C(=O)C1=C(Br)C=CC(OC)=C1O  
CC1(C)OB(OC1(C)C)C1=CC=C(C=O)C=C1  
CC1(C)OB(OC1(C)C)C1=CC(C=O)=CC=C1  
CC1(C)OB(OC1(C)C)C1=C(C=O)C=CC=C1  
O=C(OCC1=CC=CC=C1)N1CCC(=O)CC1

ClC1=CC=C(C=C1)C(=O)CBr  
O=C1CCC(CC2=CC=CC=C2)C2=CC=CC=C12  
[H]C(=O)C1=CC=C(OCC2=CC=CC=C2)C(OC)=C1  
COC1=C(OCC2=CC=CC=C2)C=CC(C=O)=C1  
CC(C)(C)OC(=O)N1C=C(C=O)C2=C1C=CC=C2  
COC1=CC=CC=C1CC(=O)\C=C\C1=CC=CC=C1  
CC(=O)C1=CC(=CC(=C1)C(F)(F)F)C(F)(F)F

**List of 205 carboxylic acids smiles:**

OC(=O)C1=C2C=CC=CC2=CC=CC=C12  
OC(=O)CC12CC3CC(CC(C3)C1)C2  
OC(=O)CCBr  
OC(=O)CCOCC1=CC=CC=C1  
OC(=O)CC#N  
OC(=O)CC1=CC=C(Cl)C=C1  
OC(=O)CCl  
OC(=O)CC1=CC(Cl)=CC=C1  
COC1=C(OC)C=C(CC(O)=O)C=C1  
COC1=CC=C(C(O)=O)C(OC)=C1  
OC(=O)CCCl  
OC(=O)C1=CC=C(O)C=C1O  
OC(=O)\C=C\C1=CC=CO1  
CC1=CC(C)=C(C=C1)C(O)=O  
OC(=O)CCC1=CC=CC=C1  
OC(=O)CC1=CC=C(O)C=C1  
OC(=O)CC1=CC=CO1  
OC(=O)CCC(=O)C1=CC=C(F)C=C1  
OC(=O)C1=C(S)C=CC=C1  
COC1=CC(=CC(OC)=C1OC)C(O)=O  
OC(=O)CC1=CNC2=C1C=CC=C2  
OC(=O)C1=CC=CC(O)=C1O  
[Cl-].OC(=O)CC1=C[NH2+]C=N1  
OC(=O)C1=CC(Br)=CC=C1O

CC1=CC=CC=C1C(O)=O  
OC(=O)C1=CC(I)=CC=C1O  
COC1=CC=C(C=C1)C(O)=O  
OC(=O)C1=CC=C(F)C(=C1)[N+]([O-])=O  
COC1=C(OC)C(=CC=C1)C(O)=O  
COC1=CC=C(C(O)=O)C(=C1)[N+]([O-])=O  
OC(=O)C(O)=O  
OC(=O)CNC(=O)OCC1=CC=CC=C1  
COC1=CC=CC(CC(O)=O)=C1  
OC(=O)C1=CC=CS1  
COC1=CC(OC)=C(OC)C=C1C(O)=O  
CC1=C(C=CC=C1C(O)=O)[N+]([O-])=O  
COC1=CC=C(CC(O)=O)C=C1  
COC1=CC=C(C(O)=O)C(OC)=C1OC  
COC1=CC=CC=C1CC(O)=O  
COC1=C(O)C=C(CCCC(O)=O)C=C1  
COC1=C(O)C(=CC=C1)C(O)=O  
COC1=C(C=C(C=C1)S(Cl)(=O)=O)C(O)=O  
OC(=O)CC1=CC=C2OCOC2=C1  
OC(=O)C1=CC=C2C=CC=CC2=C1  
CC1=CC=C(S1)C(O)=O  
COC1=CC=CC(OC)=C1C(O)=O  
OC(=O)CC1=CC=C2C=CC=CC2=C1  
OC(=O)C1=CC=CC=N1  
OC(=O)C1=C2C=CC=CC2=CC=C1  
COC1=C(OC)C=C(CCC(O)=O)C(Br)=C1  
CC\C=C\C(O)=O  
OC(=O)CC1=CC(=CC=C1)[N+]([O-])=O  
OC(=O)CCC1=CC=C2OCOC2=C1  
OC(=O)CCC(=O)C1=CC=CC=C1  
CC(=O)OCCC(O)=O  
OC(=O)CC1=CC=C(C=C1)[N+]([O-])=O

OC(=O)CC1=CC=CC=C1  
CCOC(=O)\C=C\C(O)=O  
OC(CC1=CN=CC=C1)=O  
OC(=O)C1=CNC2=C1C=CC=C2  
OC(=O)CCCC1=CC=CC=C1  
CC1=CC=C(CC(O)=O)C=C1  
OC(=O)C1CCC=CC1  
OC(=O)CCC1=CC=CC(OC(=O)C2=CC=CC=C2)=C1  
COC1=CC(\C=C\C(O)=O)=C(OC)C=C1  
CC(=O)NCC(O)=O  
OC(=O)C1=CC=C(Br)C=C1  
CC(C)(C)C(O)=O  
COC1=CC=CC(\C=C\C(O)=O)=C1  
CCCCCCCCCCCCCCCC(O)=O  
OC(=O)CC1=CC=C(I)C=C1  
CN(C)C1=CC=C(C=C1)C(O)=O  
CC(C)C(O)=O  
OC(=O)CBr  
CCC\C=C\C(O)=O  
COC1=C(OC)C=C(C=C1)C(C)C(O)=O  
CC(C)(C)C1=CC(=CC(=C1O)C(C)(C)C(O)=O  
OB(O)C1=CC=C(C=C1)C(O)=O  
COC1=C(C=CC=C1)C(O)=O  
OC(=O)C1=CC=C(Br)O1  
OC(=O)C1=CSC=C1  
CC1=CC(=CC=C1Br)C(O)=O  
OC(=O)CC1=CC=C(Br)C=C1  
COC1=CC=CC(\C=C\C(O)=O)=C1OC  
OC(=O)CC1=CC(O)=C(OCC2=CC=CC=C2)C=C1  
CCC(O)=O  
COC1=C(O)C=C(CC(O)=O)C=C1  
CCCC(O)=O

CC1(CCCCC1)C(O)=O  
CCC(Br)C(O)=O  
OC(=O)C=C  
OC(=O)C=C\C1=CC=CS1  
OC(C(O)=O)C1=CC=CC=C1  
OC(=O)C(Br)CBr  
OC(=O)CC1=CC=C(O)C(Cl)=C1  
OC(=O)C1=CC(O)=CC(O)=C1  
CC(=O)OC1=CC=C(C=C1)C(O)=O  
OC(=O)CCN1C2=C(SC3=C1C=CC=C3)C=CC=C2  
OC(=O)CC1=CC=CS1  
OCC1=C(CC(O)=O)C=C2OCOC2=C1  
CC1=C(SC=C1)C(O)=O  
COC1=CC=C2C=C(C=CC2=C1)C(C)C(O)=O  
OC(=O)CC1CCCCC1  
CC(OC(=O)NC1=CC=CC=C1)C(O)=O  
COC(C(O)=O)C1=CC=CC=C1  
OC(=O)CC1=CSC=C1  
COC1=CC=C(C=C\C(O)=O)C=C1  
CC(=O)OC1CCC(CC1)C(O)=O  
OC(C(O)=O)C1=CC=CC=C1  
OC(=O)C1=C(Cl)C=CC=C1  
OC(=O)CC1CCC=C1  
COC1=CC=CC(O)=C1C(O)=O  
OC(=O)CC1CC2CCC1C2  
COC1=C(C(O)=O)C(=CC=C1)[N+][O-]=O  
OCC(C(O)=O)C1=CC=CC=C1  
COC1=CC=C(C=C\C(O)=O)C=C1  
OC(=O)CC=C  
OC(=O)C1=CC(O)=C2C=CC=CC2=C1O  
COC(C(O)=O)(C1=CC=CC=C1)C(F)(F)F  
COC1=CC=C(OC)C(=C1)C(O)=O



OC(=O)CC1=CNC2=C1C=C(O)C=C2  
OC(=O)CCCNC(=O)OCC1=CC=CC=C1  
COC(C(O)=O)(C1=CC=CC=C1)C(F)(F)F  
OCCC(O)=O  
CC1=CC=C(C=C1)C(O)=O  
OC(=O)C#C  
CCC(C)C(O)=O  
CC1=CC=C(S1)C(O)=O  
OC(=O)CC1=CC=CC=C1[N+](=[O-])=O  
COC1=C(C(O)=O)C(Br)=CC=C1  
CC1=CC(=CC(C)=C1)C(O)=O  
CC(O)=O  
OC(=O)C1=CC2=C(NN=N2)C=C1  
OC(=O)C(F)(F)F  
COC1=C(OCC2=CC=CC=C2)C=C(CC(O)=O)C=C1  
CC(C)[C@@H](NC(=O)OC(C)(C)C)C(O)=O  
OC(=O)C1=C(O)C=CC=C1O  
OC(=O)C1=CC=CC=C1I  
CC[C@H](C)[C@H](NC(=O)OC(C)(C)C)C(O)=O  
CC(C)[C@H](NC(=O)OC(C)(C)C)C(O)=O  
CC(C)(C)OC(=O)N[C@@H](CC1=CC=CC=C1)C(O)=O  
OC(=O)C1=C(O)C=C(O)C=C1O  
O[C@@H]1O[C@@H]([C@@H](O)[C@H](O)[C@H]1O)C(O)=O  
[H][C@]12CS[C@@H](CCCC(O)=O)[C@@]1([H])NC(=O)N2  
C[C@@H](OCC1=CC=CC=C1)[C@H](NC(=O)OC(C)(C)C)C(O)=O  
OC(=O)CC1=CC(=C(O)C=C1)[N+](=[O-])=O  
CC(=C)C(O)=O  
CC(C)(C)OC(=O)N[C@@H](COCC1=CC=CC=C1)C(O)=O  
CC(C)(C)OC(=O)NCC(O)=O  
CC(C)(C)OC(=O)NC1(CC1)C(O)=O  
OC(=O)COC1=CC=C(Br)C=C1  
CC1=C(OC2=C1C=CC=C2)C(O)=O

OC(=O)C1=CC(I)=CC=C1  
CC(C)(C)OC(=O)NCCC(O)=O  
OC(=O)C1=C(O)C=CC(O)=C1  
OC(=O)C1=CN=C2C=CC=CC2=C1  
OC(=O)C1=CN=C2C=CC=CC2=N1  
OC(=O)C1=CC=C2C=CC=CC2=N1  
OC(=O)C1=NC2=C(N1)C=CC=C2  
OC(=O)C=C\C1=CC(=CC=C1)C(F)(F)F  
OC(=O)C1=CC2=C(N1)C=CC=C2  
OC(=O)C1=CC=C(CBr)C=C1  
OC(=O)C1=C(O)C=CC=C1  
C[C@H](NC(=O)OC(C)(C)C)C(O)=O  
OC(=O)CCCC#C  
OC(=O)C1=CC=CC=C1  
OC(=O)CCCC=C  
OC(=O)CCC=C  
OC(=O)CCCCCCCC=C  
OC(=O)C1=C(Cl)C2=C(S1)C=CC=C2  
OC(=O)C1CCCCC1  
OC(=O)C1=CC(F)=CC=C1  
CN1C(=CC2=C1C=CC=C2)C(O)=O  
CCC(C)C(O)=O  
OC(=O)C1=CC2=C(N1)C=CC(O)=C2  
OC(=O)C1=CC2=C(O1)C=CC=C2  
COC1=C(O)C=CC(=C1)C(O)C(O)=O  
OC(=O)C1=CC2=C(C=C1)C=C(O)C=C2  
CC(C)[C@H](NC(=O)OCC1=CC=CC=C1)C(O)=O  
COC1=CC2=CC=C(C=C2C=C1)C(O)=O  
OC(=O)C1=CC2=C(S1)C=CC=C2  
C[C@H](NC(=O)OCC1=CC=CC=C1)C(O)=O  
OC(=O)C1=CC2=C(N1)C=CC(Cl)=C2  
OC(=O)C1=CN=C2C=C(Cl)C=CC2=C1O

CC(=O)N[C@@H](CS)C(O)=O

[H][C@@]12CC[C@H]([C@H](C)CCC(O)=O)[C@@]1(C)CC[C@@]1([H])[C@@]2([H])CC[C@]2([H])C[C@H](O)CC[C@@]12C

CCCCC(O)=O

CCCCC(O)=O

CC1=NC=C(N=C1)C(O)=O

OC(=O)C#CC1=CC=CC=C1

OC(=O)C1=C(O)C(=CC(=C1)[N+][([O-])=O][N+][([O-])=O

C[C@H](Cl)C(O)=O

OC(=O)C(Br)C1=CC=CC=C1

CC(Cl)C(O)=O

COC1=CC(OC)=CC(CC(O)=O)=C1

OC(=O)C1=CC(Br)=CC=C1

OC(=O)C1=CC2=C(NC=N2)C=C1

COC1=C(\C=C\C(O)=O)C=CC=C1

OC(=O)CCCCC1

COC1=CC=CC(\C=C\C(O)=O)=C1OC

OC(=O)CCC1=CC=C(O)C=C1

CC1=C(Br)C=CC=C1C(O)=O

OC(=O)CCCB

[H][C@@]12CC[C@H]([C@H](C)CCC(O)=O)[C@@]1(C)C(=O)C[C@@]1([H])[C@@]2([H])C(=O)CC2CC(=O)CC[C@@]12C

OC(=O)C1=C(Cl)C=CC=C1Cl
